# Supplementary material for: A Bioacoustic Record of a Conservancy in the Mount Kenya Ecosystem
Source: Biodivers Data J. 2016 Oct 5;(4):e9906. doi: 10.3897/BDJ.4.e9906 (PMC5136683; doi:10.3897/BDJ.4.e9906)
Supplement: Supplementary material 1 — Annotation File [file biodiversity_data_journal-4-e9906-s001.xlsx]

## Sheet: 1
Filename	Date	Time	Location	Latitude	Longitude	Elevation	Foreground Species	Background Species	Remarks
1-2016-01-05-10-30-01	2016-01-05	10:30:00	DeKUWC	-0.389206	36.9612	1773
1-2016-01-05-10-35-02	2016-01-05	10:35:00	DeKUWC	-0.389206	36.9612	1773
1-2016-01-05-10-40-01	2016-01-05	10:40:00	DeKUWC	-0.389206	36.9612	1773	YWGR	GBCA	Engine noise in the background
1-2016-01-05-10-45-01	2016-01-05	10:45:00	DeKUWC	-0.389206	36.9612	1773
1-2016-01-05-10-50-01	2016-01-05	10:50:00	DeKUWC	-0.389206	36.9612	1773
1-2016-01-05-10-55-01	2016-01-05	10:55:00	DeKUWC	-0.389206	36.9612	1773
1-2016-01-05-11-00-02	2016-01-05	11:00:00	DeKUWC	-0.389206	36.9612	1773
1-2016-01-05-11-05-01	2016-01-05	11:05:00	DeKUWC	-0.389206	36.9612	1773
1-2016-01-05-11-10-01	2016-01-05	11:10:00	DeKUWC	-0.389206	36.9612	1773	TRBO	HATU
1-2016-01-05-11-15-01	2016-01-05	11:15:00	DeKUWC	-0.389206	36.9612	1773
1-2016-01-05-11-20-02	2016-01-05	11:20:00	DeKUWC	-0.389206	36.9612	1773
1-2016-01-05-11-25-01	2016-01-05	11:25:00	DeKUWC	-0.389206	36.9612	1773
1-2016-01-05-11-30-01	2016-01-05	11:30:00	DeKUWC	-0.389206	36.9612	1773
1-2016-01-05-11-35-01	2016-01-05	11:35:00	DeKUWC	-0.389206	36.9612	1773
1-2016-01-05-11-40-01	2016-01-05	11:40:00	DeKUWC	-0.389206	36.9612	1773
1-2016-01-05-11-45-02	2016-01-05	11:45:00	DeKUWC	-0.389206	36.9612	1773
1-2016-01-05-11-50-01	2016-01-05	11:50:00	DeKUWC	-0.389206	36.9612	1773
1-2016-01-05-11-55-01	2016-01-05	11:55:00	DeKUWC	-0.389206	36.9612	1773
1-2016-01-05-12-00-01	2016-01-05	12:00:00	DeKUWC	-0.389206	36.9612	1773
1-2016-01-05-12-05-01	2016-01-05	12:05:00	DeKUWC	-0.389206	36.9612	1773
1-2016-01-05-12-10-02	2016-01-05	12:10:00	DeKUWC	-0.389206	36.9612	1773
1-2016-01-05-12-15-01	2016-01-05	12:15:00	DeKUWC	-0.389206	36.9612	1773
1-2016-01-05-12-20-01	2016-01-05	12:20:00	DeKUWC	-0.389206	36.9612	1773
1-2016-01-05-12-25-01	2016-01-05	12:25:00	DeKUWC	-0.389206	36.9612	1773
1-2016-01-05-12-30-01	2016-01-05	12:30:00	DeKUWC	-0.389206	36.9612	1773
1-2016-01-05-12-35-01	2016-01-05	12:35:00	DeKUWC	-0.389206	36.9612	1773	GBCA		Sound of engine; crow and insect in the background
1-2016-01-05-12-40-01	2016-01-05	12:40:00	DeKUWC	-0.389206	36.9612	1773	GBCA	TADO;HATU	Engine noise in the background
1-2016-01-05-12-45-01	2016-01-05	12:45:00	DeKUWC	-0.389206	36.9612	1773		GBCA;OLTH;TADO	Insect in the foreground
1-2016-01-05-12-50-01	2016-01-05	12:50:00	DeKUWC	-0.389206	36.9612	1773
1-2016-01-05-12-55-01	2016-01-05	12:55:00	DeKUWC	-0.389206	36.9612	1773
1-2016-01-05-13-00-01	2016-01-05	13:00:00	DeKUWC	-0.389206	36.9612	1773
1-2016-01-05-13-05-01	2016-01-05	13:05:00	DeKUWC	-0.389206	36.9612	1773
1-2016-01-05-13-10-01	2016-01-05	13:10:00	DeKUWC	-0.389206	36.9612	1773
1-2016-01-05-13-15-01	2016-01-05	13:15:00	DeKUWC	-0.389206	36.9612	1773
1-2016-01-05-13-20-01	2016-01-05	13:20:00	DeKUWC	-0.389206	36.9612	1773	COBU	YRTI
1-2016-01-05-13-25-01	2016-01-05	13:25:00	DeKUWC	-0.389206	36.9612	1773
1-2016-01-05-13-30-01	2016-01-05	13:30:00	DeKUWC	-0.389206	36.9612	1773
1-2016-01-05-13-35-02	2016-01-05	13:35:00	DeKUWC	-0.389206	36.9612	1773
1-2016-01-05-13-40-01	2016-01-05	13:40:00	DeKUWC	-0.389206	36.9612	1773	GBCA	TADO
1-2016-01-05-13-45-01	2016-01-05	13:45:00	DeKUWC	-0.389206	36.9612	1773
1-2016-01-05-13-50-01	2016-01-05	13:50:00	DeKUWC	-0.389206	36.9612	1773
1-2016-01-05-13-55-01	2016-01-05	13:55:00	DeKUWC	-0.389206	36.9612	1773
1-2016-01-05-14-00-02	2016-01-05	14:00:00	DeKUWC	-0.389206	36.9612	1773
1-2016-01-05-14-05-01	2016-01-05	14:05:00	DeKUWC	-0.389206	36.9612	1773
1-2016-01-05-14-10-01	2016-01-05	14:10:00	DeKUWC	-0.389206	36.9612	1773
1-2016-01-05-14-15-01	2016-01-05	14:15:00	DeKUWC	-0.389206	36.9612	1773
1-2016-01-05-14-20-02	2016-01-05	14:20:00	DeKUWC	-0.389206	36.9612	1773
1-2016-01-05-14-25-01	2016-01-05	14:25:00	DeKUWC	-0.389206	36.9612	1773
1-2016-01-05-14-30-01	2016-01-05	14:30:00	DeKUWC	-0.389206	36.9612	1773
1-2016-01-05-14-35-01	2016-01-05	14:35:00	DeKUWC	-0.389206	36.9612	1773		GBCA;TADO;COBU;BBPU
1-2016-01-05-14-40-01	2016-01-05	14:40:00	DeKUWC	-0.389206	36.9612	1773
1-2016-01-05-14-45-02	2016-01-05	14:45:00	DeKUWC	-0.389206	36.9612	1773
1-2016-01-05-14-50-01	2016-01-05	14:50:00	DeKUWC	-0.389206	36.9612	1773
1-2016-01-05-14-55-01	2016-01-05	14:55:00	DeKUWC	-0.389206	36.9612	1773
1-2016-01-05-15-00-01	2016-01-05	15:00:00	DeKUWC	-0.389206	36.9612	1773
1-2016-01-05-15-05-01	2016-01-05	15:05:00	DeKUWC	-0.389206	36.9612	1773
1-2016-01-05-15-10-02	2016-01-05	15:10:00	DeKUWC	-0.389206	36.9612	1773
1-2016-01-05-15-15-01	2016-01-05	15:15:00	DeKUWC	-0.389206	36.9612	1773
1-2016-01-05-15-20-01	2016-01-05	15:20:00	DeKUWC	-0.389206	36.9612	1773
1-2016-01-05-15-25-01	2016-01-05	15:25:00	DeKUWC	-0.389206	36.9612	1773
1-2016-01-05-15-30-02	2016-01-05	15:30:00	DeKUWC	-0.389206	36.9612	1773
1-2016-01-05-15-35-01	2016-01-05	15:35:00	DeKUWC	-0.389206	36.9612	1773
1-2016-01-05-15-40-01	2016-01-05	15:40:00	DeKUWC	-0.389206	36.9612	1773
1-2016-01-05-15-45-01	2016-01-05	15:45:00	DeKUWC	-0.389206	36.9612	1773
1-2016-01-05-15-50-01	2016-01-05	15:50:00	DeKUWC	-0.389206	36.9612	1773
1-2016-01-05-15-55-02	2016-01-05	15:55:00	DeKUWC	-0.389206	36.9612	1773
1-2016-01-05-16-00-01	2016-01-05	16:00:00	DeKUWC	-0.389206	36.9612	1773
1-2016-01-05-16-05-01	2016-01-05	16:05:00	DeKUWC	-0.389206	36.9612	1773
1-2016-01-05-16-10-01	2016-01-05	16:10:00	DeKUWC	-0.389206	36.9612	1773
1-2016-01-05-16-15-01	2016-01-05	16:15:00	DeKUWC	-0.389206	36.9612	1773
1-2016-01-05-16-20-01	2016-01-05	16:20:00	DeKUWC	-0.389206	36.9612	1773
1-2016-01-05-16-25-01	2016-01-05	16:25:00	DeKUWC	-0.389206	36.9612	1773
1-2016-01-05-16-30-01	2016-01-05	16:30:00	DeKUWC	-0.389206	36.9612	1773
1-2016-01-05-16-35-01	2016-01-05	16:35:00	DeKUWC	-0.389206	36.9612	1773		YRTI
1-2016-01-05-16-40-01	2016-01-05	16:40:00	DeKUWC	-0.389206	36.9612	1773		YRTI
1-2016-01-05-16-45-01	2016-01-05	16:45:00	DeKUWC	-0.389206	36.9612	1773
1-2016-01-05-16-50-01	2016-01-05	16:50:00	DeKUWC	-0.389206	36.9612	1773
1-2016-01-05-16-55-01	2016-01-05	16:55:00	DeKUWC	-0.389206	36.9612	1773
1-2016-01-05-17-00-01	2016-01-05	17:00:00	DeKUWC	-0.389206	36.9612	1773
1-2016-01-05-17-05-01	2016-01-05	17:05:00	DeKUWC	-0.389206	36.9612	1773
1-2016-01-05-17-10-01	2016-01-05	17:10:00	DeKUWC	-0.389206	36.9612	1773
1-2016-01-05-17-15-01	2016-01-05	17:15:00	DeKUWC	-0.389206	36.9612	1773
1-2016-01-05-17-20-02	2016-01-05	17:20:00	DeKUWC	-0.389206	36.9612	1773			An insect
1-2016-01-05-17-25-01	2016-01-05	17:25:00	DeKUWC	-0.389206	36.9612	1773
1-2016-01-05-17-30-01	2016-01-05	17:30:00	DeKUWC	-0.389206	36.9612	1773
1-2016-01-05-17-35-01	2016-01-05	17:35:00	DeKUWC	-0.389206	36.9612	1773
1-2016-01-05-17-40-01	2016-01-05	17:40:00	DeKUWC	-0.389206	36.9612	1773
1-2016-01-05-17-45-02	2016-01-05	17:45:00	DeKUWC	-0.389206	36.9612	1773
1-2016-01-05-17-50-01	2016-01-05	17:50:00	DeKUWC	-0.389206	36.9612	1773
1-2016-01-05-17-55-01	2016-01-05	17:55:00	DeKUWC	-0.389206	36.9612	1773
1-2016-01-05-18-00-01	2016-01-05	18:00:00	DeKUWC	-0.389206	36.9612	1773
1-2016-01-05-18-05-01	2016-01-05	18:05:00	DeKUWC	-0.389206	36.9612	1773
1-2016-01-05-18-10-02	2016-01-05	18:10:00	DeKUWC	-0.389206	36.9612	1773
1-2016-01-05-18-15-01	2016-01-05	18:15:00	DeKUWC	-0.389206	36.9612	1773
1-2016-01-05-18-20-01	2016-01-05	18:20:00	DeKUWC	-0.389206	36.9612	1773
1-2016-01-05-18-25-01	2016-01-05	18:25:00	DeKUWC	-0.389206	36.9612	1773
1-2016-01-05-18-30-02	2016-01-05	18:30:00	DeKUWC	-0.389206	36.9612	1773
1-2016-01-05-18-35-01	2016-01-05	18:35:00	DeKUWC	-0.389206	36.9612	1773
1-2016-01-05-18-40-01	2016-01-05	18:40:00	DeKUWC	-0.389206	36.9612	1773
1-2016-01-05-18-45-01	2016-01-05	18:45:00	DeKUWC	-0.389206	36.9612	1773
1-2016-01-05-18-50-01	2016-01-05	18:50:00	DeKUWC	-0.389206	36.9612	1773
1-2016-01-05-18-55-02	2016-01-05	18:55:00	DeKUWC	-0.389206	36.9612	1773
1-2016-01-05-19-00-01	2016-01-05	19:00:00	DeKUWC	-0.389206	36.9612	1773
1-2016-01-05-19-05-01	2016-01-05	19:05:00	DeKUWC	-0.389206	36.9612	1773
1-2016-01-05-19-10-01	2016-01-05	19:10:00	DeKUWC	-0.389206	36.9612	1773
1-2016-01-05-19-15-01	2016-01-05	19:15:00	DeKUWC	-0.389206	36.9612	1773
1-2016-01-05-19-20-01	2016-01-05	19:20:00	DeKUWC	-0.389206	36.9612	1773
1-2016-01-05-19-25-01	2016-01-05	19:25:00	DeKUWC	-0.389206	36.9612	1773
1-2016-01-05-19-30-01	2016-01-05	19:30:00	DeKUWC	-0.389206	36.9612	1773
1-2016-01-05-19-35-01	2016-01-05	19:35:00	DeKUWC	-0.389206	36.9612	1773
1-2016-01-05-19-40-01	2016-01-05	19:40:00	DeKUWC	-0.389206	36.9612	1773
1-2016-01-05-19-45-01	2016-01-05	19:45:00	DeKUWC	-0.389206	36.9612	1773
1-2016-01-05-19-50-01	2016-01-05	19:50:00	DeKUWC	-0.389206	36.9612	1773
1-2016-01-05-19-55-01	2016-01-05	19:55:00	DeKUWC	-0.389206	36.9612	1773
1-2016-01-05-20-00-01	2016-01-05	20:00:00	DeKUWC	-0.389206	36.9612	1773
1-2016-01-05-20-05-01	2016-01-05	20:05:00	DeKUWC	-0.389206	36.9612	1773
1-2016-01-05-20-10-01	2016-01-05	20:10:00	DeKUWC	-0.389206	36.9612	1773
1-2016-01-05-20-15-01	2016-01-05	20:15:00	DeKUWC	-0.389206	36.9612	1773
1-2016-01-05-20-20-01	2016-01-05	20:20:00	DeKUWC	-0.389206	36.9612	1773
1-2016-01-05-20-25-01	2016-01-05	20:25:00	DeKUWC	-0.389206	36.9612	1773
1-2016-01-05-20-30-01	2016-01-05	20:30:00	DeKUWC	-0.389206	36.9612	1773
1-2016-01-05-20-35-01	2016-01-05	20:35:00	DeKUWC	-0.389206	36.9612	1773
1-2016-01-05-20-40-01	2016-01-05	20:40:00	DeKUWC	-0.389206	36.9612	1773
1-2016-01-05-20-45-02	2016-01-05	20:45:00	DeKUWC	-0.389206	36.9612	1773
1-2016-01-05-20-50-01	2016-01-05	20:50:00	DeKUWC	-0.389206	36.9612	1773
1-2016-01-05-20-55-01	2016-01-05	20:55:00	DeKUWC	-0.389206	36.9612	1773
1-2016-01-05-21-00-01	2016-01-05	21:00:00	DeKUWC	-0.389206	36.9612	1773
1-2016-01-05-21-05-01	2016-01-05	21:05:00	DeKUWC	-0.389206	36.9612	1773
1-2016-01-05-21-10-02	2016-01-05	21:10:00	DeKUWC	-0.389206	36.9612	1773
1-2016-01-05-21-15-01	2016-01-05	21:15:00	DeKUWC	-0.389206	36.9612	1773
1-2016-01-05-21-20-01	2016-01-05	21:20:00	DeKUWC	-0.389206	36.9612	1773
1-2016-01-05-21-25-01	2016-01-05	21:25:00	DeKUWC	-0.389206	36.9612	1773
1-2016-01-05-21-30-02	2016-01-05	21:30:00	DeKUWC	-0.389206	36.9612	1773
1-2016-01-05-21-35-01	2016-01-05	21:35:00	DeKUWC	-0.389206	36.9612	1773
1-2016-01-05-21-40-01	2016-01-05	21:40:00	DeKUWC	-0.389206	36.9612	1773
1-2016-01-05-21-45-01	2016-01-05	21:45:00	DeKUWC	-0.389206	36.9612	1773
1-2016-01-05-21-50-01	2016-01-05	21:50:00	DeKUWC	-0.389206	36.9612	1773
1-2016-01-05-21-55-02	2016-01-05	21:55:00	DeKUWC	-0.389206	36.9612	1773
1-2016-01-05-22-00-01	2016-01-05	22:00:00	DeKUWC	-0.389206	36.9612	1773
1-2016-01-05-22-05-01	2016-01-05	22:05:00	DeKUWC	-0.389206	36.9612	1773
1-2016-01-05-22-10-01	2016-01-05	22:10:00	DeKUWC	-0.389206	36.9612	1773
1-2016-01-05-22-15-01	2016-01-05	22:15:00	DeKUWC	-0.389206	36.9612	1773
1-2016-01-05-22-20-01	2016-01-05	22:20:00	DeKUWC	-0.389206	36.9612	1773
1-2016-01-05-22-25-01	2016-01-05	22:25:00	DeKUWC	-0.389206	36.9612	1773
1-2016-01-05-22-30-01	2016-01-05	22:30:00	DeKUWC	-0.389206	36.9612	1773
1-2016-01-05-22-35-01	2016-01-05	22:35:00	DeKUWC	-0.389206	36.9612	1773
1-2016-01-05-22-40-02	2016-01-05	22:40:00	DeKUWC	-0.389206	36.9612	1773
1-2016-01-05-22-45-01	2016-01-05	22:45:00	DeKUWC	-0.389206	36.9612	1773
1-2016-01-05-22-50-01	2016-01-05	22:50:00	DeKUWC	-0.389206	36.9612	1773
1-2016-01-05-22-55-01	2016-01-05	22:55:00	DeKUWC	-0.389206	36.9612	1773
1-2016-01-05-23-00-01	2016-01-05	23:00:00	DeKUWC	-0.389206	36.9612	1773
1-2016-01-05-23-05-01	2016-01-05	23:05:00	DeKUWC	-0.389206	36.9612	1773
1-2016-01-05-23-10-01	2016-01-05	23:10:00	DeKUWC	-0.389206	36.9612	1773
1-2016-01-05-23-15-01	2016-01-05	23:15:00	DeKUWC	-0.389206	36.9612	1773
1-2016-01-05-23-20-02	2016-01-05	23:20:00	DeKUWC	-0.389206	36.9612	1773
1-2016-01-05-23-25-01	2016-01-05	23:25:00	DeKUWC	-0.389206	36.9612	1773
1-2016-01-05-23-30-01	2016-01-05	23:30:00	DeKUWC	-0.389206	36.9612	1773
1-2016-01-05-23-35-01	2016-01-05	23:35:00	DeKUWC	-0.389206	36.9612	1773
1-2016-01-05-23-40-01	2016-01-05	23:40:00	DeKUWC	-0.389206	36.9612	1773
1-2016-01-05-23-45-02	2016-01-05	23:45:00	DeKUWC	-0.389206	36.9612	1773
1-2016-01-05-23-50-01	2016-01-05	23:50:00	DeKUWC	-0.389206	36.9612	1773
1-2016-01-05-23-55-01	2016-01-05	23:55:00	DeKUWC	-0.389206	36.9612	1773
1-2016-01-06-00-00-01	2016-01-06	00:00:00	DeKUWC	-0.389206	36.9612	1773
1-2016-01-06-00-05-01	2016-01-06	00:05:00	DeKUWC	-0.389206	36.9612	1773
1-2016-01-06-00-10-02	2016-01-06	00:10:00	DeKUWC	-0.389206	36.9612	1773
1-2016-01-06-00-15-01	2016-01-06	00:15:00	DeKUWC	-0.389206	36.9612	1773
1-2016-01-06-00-20-01	2016-01-06	00:20:00	DeKUWC	-0.389206	36.9612	1773
1-2016-01-06-00-25-01	2016-01-06	00:25:00	DeKUWC	-0.389206	36.9612	1773
1-2016-01-06-00-30-02	2016-01-06	00:30:00	DeKUWC	-0.389206	36.9612	1773
1-2016-01-06-00-35-01	2016-01-06	00:35:00	DeKUWC	-0.389206	36.9612	1773
1-2016-01-06-00-40-01	2016-01-06	00:40:00	DeKUWC	-0.389206	36.9612	1773
1-2016-01-06-00-45-01	2016-01-06	00:45:00	DeKUWC	-0.389206	36.9612	1773
1-2016-01-06-00-50-01	2016-01-06	00:50:00	DeKUWC	-0.389206	36.9612	1773
1-2016-01-06-00-55-02	2016-01-06	00:55:00	DeKUWC	-0.389206	36.9612	1773
1-2016-01-06-01-00-01	2016-01-06	01:00:00	DeKUWC	-0.389206	36.9612	1773
1-2016-01-06-01-05-01	2016-01-06	01:05:00	DeKUWC	-0.389206	36.9612	1773
1-2016-01-06-01-10-01	2016-01-06	01:10:00	DeKUWC	-0.389206	36.9612	1773
1-2016-01-06-01-15-01	2016-01-06	01:15:00	DeKUWC	-0.389206	36.9612	1773
1-2016-01-06-01-20-01	2016-01-06	01:20:00	DeKUWC	-0.389206	36.9612	1773
1-2016-01-06-01-25-01	2016-01-06	01:25:00	DeKUWC	-0.389206	36.9612	1773
1-2016-01-06-01-30-01	2016-01-06	01:30:00	DeKUWC	-0.389206	36.9612	1773
1-2016-01-06-01-35-01	2016-01-06	01:35:00	DeKUWC	-0.389206	36.9612	1773
1-2016-01-06-01-40-02	2016-01-06	01:40:00	DeKUWC	-0.389206	36.9612	1773
1-2016-01-06-01-45-01	2016-01-06	01:45:00	DeKUWC	-0.389206	36.9612	1773
1-2016-01-06-01-50-01	2016-01-06	01:50:00	DeKUWC	-0.389206	36.9612	1773
1-2016-01-06-01-55-01	2016-01-06	01:55:00	DeKUWC	-0.389206	36.9612	1773
1-2016-01-06-02-00-01	2016-01-06	02:00:00	DeKUWC	-0.389206	36.9612	1773
1-2016-01-06-02-05-02	2016-01-06	02:05:00	DeKUWC	-0.389206	36.9612	1773
1-2016-01-06-02-10-01	2016-01-06	02:10:00	DeKUWC	-0.389206	36.9612	1773
1-2016-01-06-02-15-01	2016-01-06	02:15:00	DeKUWC	-0.389206	36.9612	1773
1-2016-01-06-02-20-01	2016-01-06	02:20:00	DeKUWC	-0.389206	36.9612	1773
1-2016-01-06-02-25-01	2016-01-06	02:25:00	DeKUWC	-0.389206	36.9612	1773
1-2016-01-06-02-30-01	2016-01-06	02:30:00	DeKUWC	-0.389206	36.9612	1773
1-2016-01-06-02-35-01	2016-01-06	02:35:00	DeKUWC	-0.389206	36.9612	1773
1-2016-01-06-02-40-01	2016-01-06	02:40:00	DeKUWC	-0.389206	36.9612	1773
1-2016-01-06-02-45-01	2016-01-06	02:45:00	DeKUWC	-0.389206	36.9612	1773
1-2016-01-06-02-50-01	2016-01-06	02:50:00	DeKUWC	-0.389206	36.9612	1773
1-2016-01-06-02-55-01	2016-01-06	02:55:00	DeKUWC	-0.389206	36.9612	1773
1-2016-01-06-03-00-01	2016-01-06	03:00:00	DeKUWC	-0.389206	36.9612	1773
1-2016-01-06-03-05-01	2016-01-06	03:05:00	DeKUWC	-0.389206	36.9612	1773
1-2016-01-06-03-10-01	2016-01-06	03:10:00	DeKUWC	-0.389206	36.9612	1773
1-2016-01-06-03-15-01	2016-01-06	03:15:00	DeKUWC	-0.389206	36.9612	1773
1-2016-01-06-03-20-01	2016-01-06	03:20:00	DeKUWC	-0.389206	36.9612	1773
1-2016-01-06-03-25-01	2016-01-06	03:25:00	DeKUWC	-0.389206	36.9612	1773
1-2016-01-06-03-30-02	2016-01-06	03:30:00	DeKUWC	-0.389206	36.9612	1773
1-2016-01-06-03-35-01	2016-01-06	03:35:00	DeKUWC	-0.389206	36.9612	1773
1-2016-01-06-03-40-01	2016-01-06	03:40:00	DeKUWC	-0.389206	36.9612	1773
1-2016-01-06-03-45-01	2016-01-06	03:45:00	DeKUWC	-0.389206	36.9612	1773
1-2016-01-06-03-50-01	2016-01-06	03:50:00	DeKUWC	-0.389206	36.9612	1773
1-2016-01-06-03-55-02	2016-01-06	03:55:00	DeKUWC	-0.389206	36.9612	1773
1-2016-01-06-04-00-01	2016-01-06	04:00:00	DeKUWC	-0.389206	36.9612	1773
1-2016-01-06-04-05-01	2016-01-06	04:05:00	DeKUWC	-0.389206	36.9612	1773
1-2016-01-06-04-10-01	2016-01-06	04:10:00	DeKUWC	-0.389206	36.9612	1773
1-2016-01-06-04-15-01	2016-01-06	04:15:00	DeKUWC	-0.389206	36.9612	1773
1-2016-01-06-04-20-01	2016-01-06	04:20:00	DeKUWC	-0.389206	36.9612	1773
1-2016-01-06-04-25-01	2016-01-06	04:25:00	DeKUWC	-0.389206	36.9612	1773
1-2016-01-06-04-30-01	2016-01-06	04:30:00	DeKUWC	-0.389206	36.9612	1773
1-2016-01-06-04-35-01	2016-01-06	04:35:00	DeKUWC	-0.389206	36.9612	1773
1-2016-01-06-04-40-02	2016-01-06	04:40:00	DeKUWC	-0.389206	36.9612	1773
1-2016-01-06-04-45-01	2016-01-06	04:45:00	DeKUWC	-0.389206	36.9612	1773
1-2016-01-06-04-50-01	2016-01-06	04:50:00	DeKUWC	-0.389206	36.9612	1773
1-2016-01-06-04-55-01	2016-01-06	04:55:00	DeKUWC	-0.389206	36.9612	1773
1-2016-01-06-05-00-01	2016-01-06	05:00:00	DeKUWC	-0.389206	36.9612	1773
1-2016-01-06-05-05-02	2016-01-06	05:05:00	DeKUWC	-0.389206	36.9612	1773
1-2016-01-06-05-10-01	2016-01-06	05:10:00	DeKUWC	-0.389206	36.9612	1773
1-2016-01-06-05-15-01	2016-01-06	05:15:00	DeKUWC	-0.389206	36.9612	1773
1-2016-01-06-05-25-02	2016-01-06	05:25:00	DeKUWC	-0.389206	36.9612	1773
1-2016-01-06-05-30-01	2016-01-06	05:30:00	DeKUWC	-0.389206	36.9612	1773
1-2016-01-06-05-35-01	2016-01-06	05:35:00	DeKUWC	-0.389206	36.9612	1773
1-2016-01-06-05-40-01	2016-01-06	05:40:00	DeKUWC	-0.389206	36.9612	1773
1-2016-01-06-05-45-01	2016-01-06	05:45:00	DeKUWC	-0.389206	36.9612	1773
1-2016-01-06-05-50-01	2016-01-06	05:50:00	DeKUWC	-0.389206	36.9612	1773
1-2016-01-06-05-55-01	2016-01-06	05:55:00	DeKUWC	-0.389206	36.9612	1773
1-2016-01-06-06-00-01	2016-01-06	06:00:00	DeKUWC	-0.389206	36.9612	1773
1-2016-01-06-06-05-01	2016-01-06	06:05:00	DeKUWC	-0.389206	36.9612	1773
1-2016-01-06-06-10-01	2016-01-06	06:10:00	DeKUWC	-0.389206	36.9612	1773
1-2016-01-06-06-15-01	2016-01-06	06:15:00	DeKUWC	-0.389206	36.9612	1773
1-2016-01-06-06-20-01	2016-01-06	06:20:00	DeKUWC	-0.389206	36.9612	1773
1-2016-01-06-06-25-01	2016-01-06	06:25:00	DeKUWC	-0.389206	36.9612	1773
1-2016-01-06-06-30-01	2016-01-06	06:30:00	DeKUWC	-0.389206	36.9612	1773	GBCA	YWGR	Robin-Chat singing in the background
1-2016-01-06-06-35-01	2016-01-06	06:35:00	DeKUWC	-0.389206	36.9612	1773	YWGR	OLTH;HATU
1-2016-01-06-06-40-02	2016-01-06	06:40:00	DeKUWC	-0.389206	36.9612	1773	GBCA	COBU;HAIB
1-2016-01-06-06-45-01	2016-01-06	06:45:00	DeKUWC	-0.389206	36.9612	1773
1-2016-01-06-06-50-01	2016-01-06	06:50:00	DeKUWC	-0.389206	36.9612	1773		GBCA;BBPU	Insect in the foreground toward the end
1-2016-01-06-06-55-01	2016-01-06	06:55:00	DeKUWC	-0.389206	36.9612	1773
1-2016-01-06-07-00-01	2016-01-06	07:00:00	DeKUWC	-0.389206	36.9612	1773	GBCA;BBPU;PICR
1-2016-01-06-07-05-02	2016-01-06	07:05:00	DeKUWC	-0.389206	36.9612	1773
1-2016-01-06-07-10-01	2016-01-06	07:10:00	DeKUWC	-0.389206	36.9612	1773
1-2016-01-06-07-15-01	2016-01-06	07:15:00	DeKUWC	-0.389206	36.9612	1773
1-2016-01-06-07-20-01	2016-01-06	07:20:00	DeKUWC	-0.389206	36.9612	1773
1-2016-01-06-07-25-02	2016-01-06	07:25:00	DeKUWC	-0.389206	36.9612	1773
1-2016-01-06-07-30-01	2016-01-06	07:30:00	DeKUWC	-0.389206	36.9612	1773
1-2016-01-06-07-35-01	2016-01-06	07:35:00	DeKUWC	-0.389206	36.9612	1773	BBPU;ABCR;BHOR
1-2016-01-06-07-40-01	2016-01-06	07:40:00	DeKUWC	-0.389206	36.9612	1773	GBCA	YRTI
1-2016-01-06-07-45-01	2016-01-06	07:45:00	DeKUWC	-0.389206	36.9612	1773
1-2016-01-06-07-50-01	2016-01-06	07:50:00	DeKUWC	-0.389206	36.9612	1773
1-2016-01-06-07-55-01	2016-01-06	07:55:00	DeKUWC	-0.389206	36.9612	1773
1-2016-01-06-08-00-01	2016-01-06	08:00:00	DeKUWC	-0.389206	36.9612	1773
1-2016-01-06-08-05-01	2016-01-06	08:05:00	DeKUWC	-0.389206	36.9612	1773	COBU;YWGR;SCHO
1-2016-01-06-08-10-01	2016-01-06	08:10:00	DeKUWC	-0.389206	36.9612	1773
1-2016-01-06-08-15-01	2016-01-06	08:15:00	DeKUWC	-0.389206	36.9612	1773
1-2016-01-06-08-20-01	2016-01-06	08:20:00	DeKUWC	-0.389206	36.9612	1773
1-2016-01-06-08-25-01	2016-01-06	08:25:00	DeKUWC	-0.389206	36.9612	1773
1-2016-01-06-08-30-02	2016-01-06	08:30:00	DeKUWC	-0.389206	36.9612	1773
1-2016-01-06-08-35-01	2016-01-06	08:35:00	DeKUWC	-0.389206	36.9612	1773
1-2016-01-06-08-40-01	2016-01-06	08:40:00	DeKUWC	-0.389206	36.9612	1773
1-2016-01-06-08-45-01	2016-01-06	08:45:00	DeKUWC	-0.389206	36.9612	1773
1-2016-01-06-08-50-01	2016-01-06	08:50:00	DeKUWC	-0.389206	36.9612	1773
1-2016-01-06-08-55-02	2016-01-06	08:55:00	DeKUWC	-0.389206	36.9612	1773	GBCA	BBPU;TRBO
1-2016-01-06-09-00-01	2016-01-06	09:00:00	DeKUWC	-0.389206	36.9612	1773
1-2016-01-06-09-05-01	2016-01-06	09:05:00	DeKUWC	-0.389206	36.9612	1773
1-2016-01-06-09-10-01	2016-01-06	09:10:00	DeKUWC	-0.389206	36.9612	1773
1-2016-01-06-09-15-01	2016-01-06	09:15:00	DeKUWC	-0.389206	36.9612	1773
1-2016-01-06-09-20-01	2016-01-06	09:20:00	DeKUWC	-0.389206	36.9612	1773
1-2016-01-06-09-25-01	2016-01-06	09:25:00	DeKUWC	-0.389206	36.9612	1773
1-2016-01-06-09-30-01	2016-01-06	09:30:00	DeKUWC	-0.389206	36.9612	1773	HAIB
1-2016-01-06-09-35-01	2016-01-06	09:35:00	DeKUWC	-0.389206	36.9612	1773
1-2016-01-06-09-40-02	2016-01-06	09:40:00	DeKUWC	-0.389206	36.9612	1773	GBCA	BWWA;YRTI
1-2016-01-06-09-45-01	2016-01-06	09:45:00	DeKUWC	-0.389206	36.9612	1773
1-2016-01-06-09-50-01	2016-01-06	09:50:00	DeKUWC	-0.389206	36.9612	1773
1-2016-01-06-09-55-01	2016-01-06	09:55:00	DeKUWC	-0.389206	36.9612	1773
1-2016-01-06-10-00-01	2016-01-06	10:00:00	DeKUWC	-0.389206	36.9612	1773
1-2016-01-06-10-05-02	2016-01-06	10:05:00	DeKUWC	-0.389206	36.9612	1773
1-2016-01-06-10-10-01	2016-01-06	10:10:00	DeKUWC	-0.389206	36.9612	1773
1-2016-01-06-10-15-01	2016-01-06	10:15:00	DeKUWC	-0.389206	36.9612	1773
1-2016-01-06-10-20-01	2016-01-06	10:20:00	DeKUWC	-0.389206	36.9612	1773
1-2016-01-06-10-25-02	2016-01-06	10:25:00	DeKUWC	-0.389206	36.9612	1773
1-2016-01-06-10-30-01	2016-01-06	10:30:00	DeKUWC	-0.389206	36.9612	1773
1-2016-01-06-10-35-01	2016-01-06	10:35:00	DeKUWC	-0.389206	36.9612	1773
1-2016-01-06-10-40-01	2016-01-06	10:40:00	DeKUWC	-0.389206	36.9612	1773
1-2016-01-06-10-45-01	2016-01-06	10:45:00	DeKUWC	-0.389206	36.9612	1773	YRTI	TRBO;GBCA;BWWA
1-2016-01-06-10-50-02	2016-01-06	10:50:00	DeKUWC	-0.389206	36.9612	1773
1-2016-01-06-10-55-01	2016-01-06	10:55:00	DeKUWC	-0.389206	36.9612	1773
1-2016-01-06-11-00-01	2016-01-06	11:00:00	DeKUWC	-0.389206	36.9612	1773
1-2016-01-06-11-05-01	2016-01-06	11:05:00	DeKUWC	-0.389206	36.9612	1773
1-2016-01-06-11-10-01	2016-01-06	11:10:00	DeKUWC	-0.389206	36.9612	1773
1-2016-01-06-11-15-02	2016-01-06	11:15:00	DeKUWC	-0.389206	36.9612	1773
1-2016-01-06-11-20-01	2016-01-06	11:20:00	DeKUWC	-0.389206	36.9612	1773
1-2016-01-06-11-25-01	2016-01-06	11:25:00	DeKUWC	-0.389206	36.9612	1773
1-2016-01-06-11-30-01	2016-01-06	11:30:00	DeKUWC	-0.389206	36.9612	1773
1-2016-01-06-11-35-01	2016-01-06	11:35:00	DeKUWC	-0.389206	36.9612	1773
1-2016-01-06-11-40-01	2016-01-06	11:40:00	DeKUWC	-0.389206	36.9612	1773
1-2016-01-06-11-45-01	2016-01-06	11:45:00	DeKUWC	-0.389206	36.9612	1773
1-2016-01-06-11-50-01	2016-01-06	11:50:00	DeKUWC	-0.389206	36.9612	1773
1-2016-01-06-11-55-01	2016-01-06	11:55:00	DeKUWC	-0.389206	36.9612	1773
1-2016-01-06-12-00-01	2016-01-06	12:00:00	DeKUWC	-0.389206	36.9612	1773
1-2016-01-06-12-05-01	2016-01-06	12:05:00	DeKUWC	-0.389206	36.9612	1773
1-2016-01-06-12-10-01	2016-01-06	12:10:00	DeKUWC	-0.389206	36.9612	1773
1-2016-01-06-12-15-01	2016-01-06	12:15:00	DeKUWC	-0.389206	36.9612	1773
1-2016-01-06-12-20-01	2016-01-06	12:20:00	DeKUWC	-0.389206	36.9612	1773
1-2016-01-06-12-25-01	2016-01-06	12:25:00	DeKUWC	-0.389206	36.9612	1773
1-2016-01-06-12-30-01	2016-01-06	12:30:00	DeKUWC	-0.389206	36.9612	1773	FTDR	YRTI
1-2016-01-06-12-35-01	2016-01-06	12:35:00	DeKUWC	-0.389206	36.9612	1773
1-2016-01-06-12-40-02	2016-01-06	12:40:00	DeKUWC	-0.389206	36.9612	1773
1-2016-01-06-12-45-01	2016-01-06	12:45:00	DeKUWC	-0.389206	36.9612	1773
1-2016-01-06-12-50-01	2016-01-06	12:50:00	DeKUWC	-0.389206	36.9612	1773
1-2016-01-06-12-55-01	2016-01-06	12:55:00	DeKUWC	-0.389206	36.9612	1773
1-2016-01-06-13-00-01	2016-01-06	13:00:00	DeKUWC	-0.389206	36.9612	1773
1-2016-01-06-13-05-02	2016-01-06	13:05:00	DeKUWC	-0.389206	36.9612	1773
1-2016-01-06-13-10-01	2016-01-06	13:10:00	DeKUWC	-0.389206	36.9612	1773
1-2016-01-06-13-15-01	2016-01-06	13:15:00	DeKUWC	-0.389206	36.9612	1773
1-2016-01-06-13-20-01	2016-01-06	13:20:00	DeKUWC	-0.389206	36.9612	1773
1-2016-01-06-13-25-02	2016-01-06	13:25:00	DeKUWC	-0.389206	36.9612	1773
1-2016-01-06-13-30-01	2016-01-06	13:30:00	DeKUWC	-0.389206	36.9612	1773
1-2016-01-06-13-35-01	2016-01-06	13:35:00	DeKUWC	-0.389206	36.9612	1773
1-2016-01-06-13-40-01	2016-01-06	13:40:00	DeKUWC	-0.389206	36.9612	1773
1-2016-01-06-13-45-01	2016-01-06	13:45:00	DeKUWC	-0.389206	36.9612	1773
1-2016-01-06-13-50-02	2016-01-06	13:50:00	DeKUWC	-0.389206	36.9612	1773
1-2016-01-06-13-55-01	2016-01-06	13:55:00	DeKUWC	-0.389206	36.9612	1773
1-2016-01-06-14-00-01	2016-01-06	14:00:00	DeKUWC	-0.389206	36.9612	1773
1-2016-01-06-14-05-01	2016-01-06	14:05:00	DeKUWC	-0.389206	36.9612	1773	GBCA;YRTI
1-2016-01-06-14-10-01	2016-01-06	14:10:00	DeKUWC	-0.389206	36.9612	1773	YWGR;FTDR
1-2016-01-06-14-15-02	2016-01-06	14:15:00	DeKUWC	-0.389206	36.9612	1773
1-2016-01-06-14-20-01	2016-01-06	14:20:00	DeKUWC	-0.389206	36.9612	1773
1-2016-01-06-14-25-01	2016-01-06	14:25:00	DeKUWC	-0.389206	36.9612	1773			An insect
1-2016-01-06-14-30-01	2016-01-06	14:30:00	DeKUWC	-0.389206	36.9612	1773
1-2016-01-06-14-35-02	2016-01-06	14:35:00	DeKUWC	-0.389206	36.9612	1773
1-2016-01-06-14-40-01	2016-01-06	14:40:00	DeKUWC	-0.389206	36.9612	1773
1-2016-01-06-14-45-01	2016-01-06	14:45:00	DeKUWC	-0.389206	36.9612	1773
1-2016-01-06-14-50-01	2016-01-06	14:50:00	DeKUWC	-0.389206	36.9612	1773
1-2016-01-06-14-55-01	2016-01-06	14:55:00	DeKUWC	-0.389206	36.9612	1773
1-2016-01-06-15-00-01	2016-01-06	15:00:00	DeKUWC	-0.389206	36.9612	1773
1-2016-01-06-15-05-01	2016-01-06	15:05:00	DeKUWC	-0.389206	36.9612	1773
1-2016-01-06-15-10-01	2016-01-06	15:10:00	DeKUWC	-0.389206	36.9612	1773
1-2016-01-06-15-15-01	2016-01-06	15:15:00	DeKUWC	-0.389206	36.9612	1773
1-2016-01-06-15-20-01	2016-01-06	15:20:00	DeKUWC	-0.389206	36.9612	1773
1-2016-01-06-15-25-01	2016-01-06	15:25:00	DeKUWC	-0.389206	36.9612	1773
1-2016-01-06-15-30-01	2016-01-06	15:30:00	DeKUWC	-0.389206	36.9612	1773
1-2016-01-06-15-35-01	2016-01-06	15:35:00	DeKUWC	-0.389206	36.9612	1773
1-2016-01-06-15-40-02	2016-01-06	15:40:00	DeKUWC	-0.389206	36.9612	1773
1-2016-01-06-15-45-01	2016-01-06	15:45:00	DeKUWC	-0.389206	36.9612	1773
1-2016-01-06-15-50-01	2016-01-06	15:50:00	DeKUWC	-0.389206	36.9612	1773			An insect
1-2016-01-06-15-55-01	2016-01-06	15:55:00	DeKUWC	-0.389206	36.9612	1773
1-2016-01-06-16-00-01	2016-01-06	16:00:00	DeKUWC	-0.389206	36.9612	1773
1-2016-01-06-16-05-02	2016-01-06	16:05:00	DeKUWC	-0.389206	36.9612	1773

## Sheet: 2
Filename	Date	Time	Location	Latitude	Longitude	Elevation	Foreground Species	Background Species	Remarks
2-2016-01-05-11-20-01	2016-01-05	11:20:00	DeKUWC	-0.387812	36.9622	1778
2-2016-01-05-11-25-01	2016-01-05	11:25:00	DeKUWC	-0.387812	36.9622	1778
2-2016-01-05-11-30-01	2016-01-05	11:30:00	DeKUWC	-0.387812	36.9622	1778
2-2016-01-05-11-35-01	2016-01-05	11:35:00	DeKUWC	-0.387812	36.9622	1778
2-2016-01-05-11-40-01	2016-01-05	11:40:00	DeKUWC	-0.387812	36.9622	1778
2-2016-01-05-11-45-01	2016-01-05	11:45:00	DeKUWC	-0.387812	36.9622	1778
2-2016-01-05-11-50-02	2016-01-05	11:50:00	DeKUWC	-0.387812	36.9622	1778
2-2016-01-05-11-55-01	2016-01-05	11:55:00	DeKUWC	-0.387812	36.9622	1778
2-2016-01-05-12-00-01	2016-01-05	12:00:00	DeKUWC	-0.387812	36.9622	1778
2-2016-01-05-12-05-01	2016-01-05	12:05:00	DeKUWC	-0.387812	36.9622	1778
2-2016-01-05-12-10-01	2016-01-05	12:10:00	DeKUWC	-0.387812	36.9622	1778
2-2016-01-05-12-15-01	2016-01-05	12:15:00	DeKUWC	-0.387812	36.9622	1778
2-2016-01-05-12-20-01	2016-01-05	12:20:00	DeKUWC	-0.387812	36.9622	1778
2-2016-01-05-12-25-01	2016-01-05	12:25:00	DeKUWC	-0.387812	36.9622	1778
2-2016-01-05-12-30-01	2016-01-05	12:30:00	DeKUWC	-0.387812	36.9622	1778
2-2016-01-05-12-35-01	2016-01-05	12:35:00	DeKUWC	-0.387812	36.9622	1778
2-2016-01-05-12-40-01	2016-01-05	12:40:00	DeKUWC	-0.387812	36.9622	1778
2-2016-01-05-12-45-01	2016-01-05	12:45:00	DeKUWC	-0.387812	36.9622	1778
2-2016-01-05-12-50-01	2016-01-05	12:50:00	DeKUWC	-0.387812	36.9622	1778
2-2016-01-05-12-55-01	2016-01-05	12:55:00	DeKUWC	-0.387812	36.9622	1778
2-2016-01-05-13-00-01	2016-01-05	13:00:00	DeKUWC	-0.387812	36.9622	1778
2-2016-01-05-13-05-01	2016-01-05	13:05:00	DeKUWC	-0.387812	36.9622	1778
2-2016-01-05-13-10-01	2016-01-05	13:10:00	DeKUWC	-0.387812	36.9622	1778
2-2016-01-05-13-15-02	2016-01-05	13:15:00	DeKUWC	-0.387812	36.9622	1778
2-2016-01-05-13-20-01	2016-01-05	13:20:00	DeKUWC	-0.387812	36.9622	1778	YWGR;GBCA
2-2016-01-05-13-25-01	2016-01-05	13:25:00	DeKUWC	-0.387812	36.9622	1778
2-2016-01-05-13-30-01	2016-01-05	13:30:00	DeKUWC	-0.387812	36.9622	1778	YWGR
2-2016-01-05-13-35-01	2016-01-05	13:35:00	DeKUWC	-0.387812	36.9622	1778
2-2016-01-05-13-40-01	2016-01-05	13:40:00	DeKUWC	-0.387812	36.9622	1778
2-2016-01-05-13-45-01	2016-01-05	13:45:00	DeKUWC	-0.387812	36.9622	1778
2-2016-01-05-13-50-01	2016-01-05	13:50:00	DeKUWC	-0.387812	36.9622	1778
2-2016-01-05-13-55-01	2016-01-05	13:55:00	DeKUWC	-0.387812	36.9622	1778
2-2016-01-05-14-00-01	2016-01-05	14:00:00	DeKUWC	-0.387812	36.9622	1778
2-2016-01-05-14-05-01	2016-01-05	14:05:00	DeKUWC	-0.387812	36.9622	1778
2-2016-01-05-14-10-01	2016-01-05	14:10:00	DeKUWC	-0.387812	36.9622	1778
2-2016-01-05-14-15-01	2016-01-05	14:15:00	DeKUWC	-0.387812	36.9622	1778
2-2016-01-05-14-20-01	2016-01-05	14:20:00	DeKUWC	-0.387812	36.9622	1778
2-2016-01-05-14-25-01	2016-01-05	14:25:00	DeKUWC	-0.387812	36.9622	1778
2-2016-01-05-14-30-02	2016-01-05	14:30:00	DeKUWC	-0.387812	36.9622	1778
2-2016-01-05-14-35-01	2016-01-05	14:35:00	DeKUWC	-0.387812	36.9622	1778
2-2016-01-05-14-40-01	2016-01-05	14:40:00	DeKUWC	-0.387812	36.9622	1778
2-2016-01-05-14-45-01	2016-01-05	14:45:00	DeKUWC	-0.387812	36.9622	1778
2-2016-01-05-14-50-01	2016-01-05	14:50:00	DeKUWC	-0.387812	36.9622	1778
2-2016-01-05-14-55-01	2016-01-05	14:55:00	DeKUWC	-0.387812	36.9622	1778
2-2016-01-05-15-00-01	2016-01-05	15:00:00	DeKUWC	-0.387812	36.9622	1778
2-2016-01-05-15-05-01	2016-01-05	15:05:00	DeKUWC	-0.387812	36.9622	1778
2-2016-01-05-15-10-01	2016-01-05	15:10:00	DeKUWC	-0.387812	36.9622	1778
2-2016-01-05-15-15-01	2016-01-05	15:15:00	DeKUWC	-0.387812	36.9622	1778
2-2016-01-05-15-20-01	2016-01-05	15:20:00	DeKUWC	-0.387812	36.9622	1778		YWGR	Very faint
2-2016-01-05-15-25-01	2016-01-05	15:25:00	DeKUWC	-0.387812	36.9622	1778
2-2016-01-05-15-30-01	2016-01-05	15:30:00	DeKUWC	-0.387812	36.9622	1778
2-2016-01-05-15-35-01	2016-01-05	15:35:00	DeKUWC	-0.387812	36.9622	1778
2-2016-01-05-15-40-01	2016-01-05	15:40:00	DeKUWC	-0.387812	36.9622	1778
2-2016-01-05-15-45-01	2016-01-05	15:45:00	DeKUWC	-0.387812	36.9622	1778
2-2016-01-05-15-50-02	2016-01-05	15:50:00	DeKUWC	-0.387812	36.9622	1778
2-2016-01-05-15-55-02	2016-01-05	15:55:00	DeKUWC	-0.387812	36.9622	1778	GBCA	YRTI;YWGR
2-2016-01-05-16-00-01	2016-01-05	16:00:00	DeKUWC	-0.387812	36.9622	1778
2-2016-01-05-16-05-01	2016-01-05	16:05:00	DeKUWC	-0.387812	36.9622	1778
2-2016-01-05-16-10-01	2016-01-05	16:10:00	DeKUWC	-0.387812	36.9622	1778
2-2016-01-05-16-15-01	2016-01-05	16:15:00	DeKUWC	-0.387812	36.9622	1778
2-2016-01-05-16-20-01	2016-01-05	16:20:00	DeKUWC	-0.387812	36.9622	1778
2-2016-01-05-16-25-01	2016-01-05	16:25:00	DeKUWC	-0.387812	36.9622	1778	YWGR	TRBO
2-2016-01-05-16-30-01	2016-01-05	16:30:00	DeKUWC	-0.387812	36.9622	1778
2-2016-01-05-16-35-01	2016-01-05	16:35:00	DeKUWC	-0.387812	36.9622	1778
2-2016-01-05-16-40-01	2016-01-05	16:40:00	DeKUWC	-0.387812	36.9622	1778
2-2016-01-05-16-45-01	2016-01-05	16:45:00	DeKUWC	-0.387812	36.9622	1778
2-2016-01-05-16-50-01	2016-01-05	16:50:00	DeKUWC	-0.387812	36.9622	1778
2-2016-01-05-16-55-01	2016-01-05	16:55:00	DeKUWC	-0.387812	36.9622	1778
2-2016-01-05-17-00-01	2016-01-05	17:00:00	DeKUWC	-0.387812	36.9622	1778
2-2016-01-05-17-05-01	2016-01-05	17:05:00	DeKUWC	-0.387812	36.9622	1778
2-2016-01-05-17-10-01	2016-01-05	17:10:00	DeKUWC	-0.387812	36.9622	1778
2-2016-01-05-17-15-02	2016-01-05	17:15:00	DeKUWC	-0.387812	36.9622	1778
2-2016-01-05-17-20-01	2016-01-05	17:20:00	DeKUWC	-0.387812	36.9622	1778	YWGR
2-2016-01-05-17-25-01	2016-01-05	17:25:00	DeKUWC	-0.387812	36.9622	1778	YWGR	HATU
2-2016-01-05-17-30-01	2016-01-05	17:30:00	DeKUWC	-0.387812	36.9622	1778
2-2016-01-05-17-35-01	2016-01-05	17:35:00	DeKUWC	-0.387812	36.9622	1778
2-2016-01-05-17-40-01	2016-01-05	17:40:00	DeKUWC	-0.387812	36.9622	1778
2-2016-01-05-17-45-01	2016-01-05	17:45:00	DeKUWC	-0.387812	36.9622	1778
2-2016-01-05-17-50-01	2016-01-05	17:50:00	DeKUWC	-0.387812	36.9622	1778
2-2016-01-05-17-55-01	2016-01-05	17:55:00	DeKUWC	-0.387812	36.9622	1778
2-2016-01-05-18-00-01	2016-01-05	18:00:00	DeKUWC	-0.387812	36.9622	1778
2-2016-01-05-18-05-01	2016-01-05	18:05:00	DeKUWC	-0.387812	36.9622	1778	YWGR;FTDR	HATU;TADO;GBCA
2-2016-01-05-18-10-01	2016-01-05	18:10:00	DeKUWC	-0.387812	36.9622	1778	RURC;BWWA	HATU
2-2016-01-05-18-15-01	2016-01-05	18:15:00	DeKUWC	-0.387812	36.9622	1778
2-2016-01-05-18-20-01	2016-01-05	18:20:00	DeKUWC	-0.387812	36.9622	1778
2-2016-01-05-18-25-01	2016-01-05	18:25:00	DeKUWC	-0.387812	36.9622	1778
2-2016-01-05-18-30-02	2016-01-05	18:30:00	DeKUWC	-0.387812	36.9622	1778
2-2016-01-05-18-35-01	2016-01-05	18:35:00	DeKUWC	-0.387812	36.9622	1778
2-2016-01-05-18-40-01	2016-01-05	18:40:00	DeKUWC	-0.387812	36.9622	1778
2-2016-01-05-18-45-01	2016-01-05	18:45:00	DeKUWC	-0.387812	36.9622	1778
2-2016-01-05-18-50-01	2016-01-05	18:50:00	DeKUWC	-0.387812	36.9622	1778
2-2016-01-05-18-55-01	2016-01-05	18:55:00	DeKUWC	-0.387812	36.9622	1778
2-2016-01-05-19-00-01	2016-01-05	19:00:00	DeKUWC	-0.387812	36.9622	1778
2-2016-01-05-19-05-01	2016-01-05	19:05:00	DeKUWC	-0.387812	36.9622	1778
2-2016-01-05-19-10-01	2016-01-05	19:10:00	DeKUWC	-0.387812	36.9622	1778
2-2016-01-05-19-15-01	2016-01-05	19:15:00	DeKUWC	-0.387812	36.9622	1778
2-2016-01-05-19-20-01	2016-01-05	19:20:00	DeKUWC	-0.387812	36.9622	1778
2-2016-01-05-19-25-01	2016-01-05	19:25:00	DeKUWC	-0.387812	36.9622	1778
2-2016-01-05-19-30-01	2016-01-05	19:30:00	DeKUWC	-0.387812	36.9622	1778
2-2016-01-05-19-35-01	2016-01-05	19:35:00	DeKUWC	-0.387812	36.9622	1778
2-2016-01-05-19-40-01	2016-01-05	19:40:00	DeKUWC	-0.387812	36.9622	1778
2-2016-01-05-19-45-01	2016-01-05	19:45:00	DeKUWC	-0.387812	36.9622	1778
2-2016-01-05-19-50-01	2016-01-05	19:50:00	DeKUWC	-0.387812	36.9622	1778
2-2016-01-05-19-55-02	2016-01-05	19:55:00	DeKUWC	-0.387812	36.9622	1778
2-2016-01-05-20-00-01	2016-01-05	20:00:00	DeKUWC	-0.387812	36.9622	1778
2-2016-01-05-20-05-01	2016-01-05	20:05:00	DeKUWC	-0.387812	36.9622	1778
2-2016-01-05-20-10-01	2016-01-05	20:10:00	DeKUWC	-0.387812	36.9622	1778
2-2016-01-05-20-15-01	2016-01-05	20:15:00	DeKUWC	-0.387812	36.9622	1778
2-2016-01-05-20-20-01	2016-01-05	20:20:00	DeKUWC	-0.387812	36.9622	1778
2-2016-01-05-20-25-01	2016-01-05	20:25:00	DeKUWC	-0.387812	36.9622	1778
2-2016-01-05-20-30-01	2016-01-05	20:30:00	DeKUWC	-0.387812	36.9622	1778
2-2016-01-05-20-35-01	2016-01-05	20:35:00	DeKUWC	-0.387812	36.9622	1778
2-2016-01-05-20-40-01	2016-01-05	20:40:00	DeKUWC	-0.387812	36.9622	1778
2-2016-01-05-20-45-01	2016-01-05	20:45:00	DeKUWC	-0.387812	36.9622	1778
2-2016-01-05-20-50-02	2016-01-05	20:50:00	DeKUWC	-0.387812	36.9622	1778
2-2016-01-05-20-55-02	2016-01-05	20:55:00	DeKUWC	-0.387812	36.9622	1778
2-2016-01-05-21-00-01	2016-01-05	21:00:00	DeKUWC	-0.387812	36.9622	1778
2-2016-01-05-21-05-01	2016-01-05	21:05:00	DeKUWC	-0.387812	36.9622	1778
2-2016-01-05-21-10-01	2016-01-05	21:10:00	DeKUWC	-0.387812	36.9622	1778
2-2016-01-05-21-15-01	2016-01-05	21:15:00	DeKUWC	-0.387812	36.9622	1778
2-2016-01-05-21-20-01	2016-01-05	21:20:00	DeKUWC	-0.387812	36.9622	1778
2-2016-01-05-21-25-01	2016-01-05	21:25:00	DeKUWC	-0.387812	36.9622	1778
2-2016-01-05-21-30-01	2016-01-05	21:30:00	DeKUWC	-0.387812	36.9622	1778
2-2016-01-05-21-35-01	2016-01-05	21:35:00	DeKUWC	-0.387812	36.9622	1778
2-2016-01-05-21-40-01	2016-01-05	21:40:00	DeKUWC	-0.387812	36.9622	1778
2-2016-01-05-21-45-01	2016-01-05	21:45:00	DeKUWC	-0.387812	36.9622	1778
2-2016-01-05-21-50-02	2016-01-05	21:50:00	DeKUWC	-0.387812	36.9622	1778
2-2016-01-05-21-55-01	2016-01-05	21:55:00	DeKUWC	-0.387812	36.9622	1778
2-2016-01-05-22-00-01	2016-01-05	22:00:00	DeKUWC	-0.387812	36.9622	1778
2-2016-01-05-22-05-01	2016-01-05	22:05:00	DeKUWC	-0.387812	36.9622	1778
2-2016-01-05-22-10-01	2016-01-05	22:10:00	DeKUWC	-0.387812	36.9622	1778
2-2016-01-05-22-15-01	2016-01-05	22:15:00	DeKUWC	-0.387812	36.9622	1778
2-2016-01-05-22-20-01	2016-01-05	22:20:00	DeKUWC	-0.387812	36.9622	1778
2-2016-01-05-22-25-01	2016-01-05	22:25:00	DeKUWC	-0.387812	36.9622	1778
2-2016-01-05-22-30-01	2016-01-05	22:30:00	DeKUWC	-0.387812	36.9622	1778
2-2016-01-05-22-35-01	2016-01-05	22:35:00	DeKUWC	-0.387812	36.9622	1778
2-2016-01-05-22-40-01	2016-01-05	22:40:00	DeKUWC	-0.387812	36.9622	1778
2-2016-01-05-22-45-02	2016-01-05	22:45:00	DeKUWC	-0.387812	36.9622	1778
2-2016-01-05-22-50-01	2016-01-05	22:50:00	DeKUWC	-0.387812	36.9622	1778
2-2016-01-05-22-55-01	2016-01-05	22:55:00	DeKUWC	-0.387812	36.9622	1778
2-2016-01-05-23-00-01	2016-01-05	23:00:00	DeKUWC	-0.387812	36.9622	1778
2-2016-01-05-23-05-01	2016-01-05	23:05:00	DeKUWC	-0.387812	36.9622	1778
2-2016-01-05-23-10-01	2016-01-05	23:10:00	DeKUWC	-0.387812	36.9622	1778
2-2016-01-05-23-15-01	2016-01-05	23:15:00	DeKUWC	-0.387812	36.9622	1778
2-2016-01-05-23-20-01	2016-01-05	23:20:00	DeKUWC	-0.387812	36.9622	1778
2-2016-01-05-23-25-01	2016-01-05	23:25:00	DeKUWC	-0.387812	36.9622	1778
2-2016-01-05-23-30-01	2016-01-05	23:30:00	DeKUWC	-0.387812	36.9622	1778
2-2016-01-05-23-35-01	2016-01-05	23:35:00	DeKUWC	-0.387812	36.9622	1778
2-2016-01-05-23-40-02	2016-01-05	23:40:00	DeKUWC	-0.387812	36.9622	1778
2-2016-01-05-23-45-01	2016-01-05	23:45:00	DeKUWC	-0.387812	36.9622	1778
2-2016-01-05-23-50-01	2016-01-05	23:50:00	DeKUWC	-0.387812	36.9622	1778
2-2016-01-05-23-55-01	2016-01-05	23:55:00	DeKUWC	-0.387812	36.9622	1778
2-2016-01-06-00-00-01	2016-01-06	00:00:00	DeKUWC	-0.387812	36.9622	1778
2-2016-01-06-00-05-01	2016-01-06	00:05:00	DeKUWC	-0.387812	36.9622	1778
2-2016-01-06-00-10-01	2016-01-06	00:10:00	DeKUWC	-0.387812	36.9622	1778
2-2016-01-06-00-15-01	2016-01-06	00:15:00	DeKUWC	-0.387812	36.9622	1778
2-2016-01-06-00-20-01	2016-01-06	00:20:00	DeKUWC	-0.387812	36.9622	1778
2-2016-01-06-00-25-01	2016-01-06	00:25:00	DeKUWC	-0.387812	36.9622	1778
2-2016-01-06-00-30-01	2016-01-06	00:30:00	DeKUWC	-0.387812	36.9622	1778
2-2016-01-06-00-35-02	2016-01-06	00:35:00	DeKUWC	-0.387812	36.9622	1778
2-2016-01-06-00-40-01	2016-01-06	00:40:00	DeKUWC	-0.387812	36.9622	1778
2-2016-01-06-00-45-01	2016-01-06	00:45:00	DeKUWC	-0.387812	36.9622	1778
2-2016-01-06-00-50-01	2016-01-06	00:50:00	DeKUWC	-0.387812	36.9622	1778
2-2016-01-06-00-55-01	2016-01-06	00:55:00	DeKUWC	-0.387812	36.9622	1778
2-2016-01-06-01-00-01	2016-01-06	01:00:00	DeKUWC	-0.387812	36.9622	1778
2-2016-01-06-01-05-01	2016-01-06	01:05:00	DeKUWC	-0.387812	36.9622	1778
2-2016-01-06-01-10-01	2016-01-06	01:10:00	DeKUWC	-0.387812	36.9622	1778
2-2016-01-06-01-15-01	2016-01-06	01:15:00	DeKUWC	-0.387812	36.9622	1778
2-2016-01-06-01-20-01	2016-01-06	01:20:00	DeKUWC	-0.387812	36.9622	1778
2-2016-01-06-01-25-01	2016-01-06	01:25:00	DeKUWC	-0.387812	36.9622	1778
2-2016-01-06-01-30-02	2016-01-06	01:30:00	DeKUWC	-0.387812	36.9622	1778
2-2016-01-06-01-35-02	2016-01-06	01:35:00	DeKUWC	-0.387812	36.9622	1778
2-2016-01-06-01-40-01	2016-01-06	01:40:00	DeKUWC	-0.387812	36.9622	1778
2-2016-01-06-01-45-01	2016-01-06	01:45:00	DeKUWC	-0.387812	36.9622	1778
2-2016-01-06-01-50-01	2016-01-06	01:50:00	DeKUWC	-0.387812	36.9622	1778
2-2016-01-06-01-55-01	2016-01-06	01:55:00	DeKUWC	-0.387812	36.9622	1778
2-2016-01-06-02-00-01	2016-01-06	02:00:00	DeKUWC	-0.387812	36.9622	1778
2-2016-01-06-02-05-01	2016-01-06	02:05:00	DeKUWC	-0.387812	36.9622	1778
2-2016-01-06-02-10-01	2016-01-06	02:10:00	DeKUWC	-0.387812	36.9622	1778
2-2016-01-06-02-15-01	2016-01-06	02:15:00	DeKUWC	-0.387812	36.9622	1778
2-2016-01-06-02-20-01	2016-01-06	02:20:00	DeKUWC	-0.387812	36.9622	1778
2-2016-01-06-02-25-01	2016-01-06	02:25:00	DeKUWC	-0.387812	36.9622	1778
2-2016-01-06-02-30-02	2016-01-06	02:30:00	DeKUWC	-0.387812	36.9622	1778
2-2016-01-06-02-35-01	2016-01-06	02:35:00	DeKUWC	-0.387812	36.9622	1778
2-2016-01-06-02-40-01	2016-01-06	02:40:00	DeKUWC	-0.387812	36.9622	1778
2-2016-01-06-02-45-01	2016-01-06	02:45:00	DeKUWC	-0.387812	36.9622	1778
2-2016-01-06-02-50-01	2016-01-06	02:50:00	DeKUWC	-0.387812	36.9622	1778
2-2016-01-06-02-55-01	2016-01-06	02:55:00	DeKUWC	-0.387812	36.9622	1778
2-2016-01-06-03-00-01	2016-01-06	03:00:00	DeKUWC	-0.387812	36.9622	1778
2-2016-01-06-03-05-01	2016-01-06	03:05:00	DeKUWC	-0.387812	36.9622	1778
2-2016-01-06-03-10-01	2016-01-06	03:10:00	DeKUWC	-0.387812	36.9622	1778
2-2016-01-06-03-15-01	2016-01-06	03:15:00	DeKUWC	-0.387812	36.9622	1778
2-2016-01-06-03-20-01	2016-01-06	03:20:00	DeKUWC	-0.387812	36.9622	1778
2-2016-01-06-03-25-02	2016-01-06	03:25:00	DeKUWC	-0.387812	36.9622	1778
2-2016-01-06-03-30-01	2016-01-06	03:30:00	DeKUWC	-0.387812	36.9622	1778
2-2016-01-06-03-35-01	2016-01-06	03:35:00	DeKUWC	-0.387812	36.9622	1778
2-2016-01-06-03-40-01	2016-01-06	03:40:00	DeKUWC	-0.387812	36.9622	1778
2-2016-01-06-03-45-01	2016-01-06	03:45:00	DeKUWC	-0.387812	36.9622	1778
2-2016-01-06-03-50-01	2016-01-06	03:50:00	DeKUWC	-0.387812	36.9622	1778
2-2016-01-06-03-55-01	2016-01-06	03:55:00	DeKUWC	-0.387812	36.9622	1778
2-2016-01-06-04-00-01	2016-01-06	04:00:00	DeKUWC	-0.387812	36.9622	1778
2-2016-01-06-04-05-01	2016-01-06	04:05:00	DeKUWC	-0.387812	36.9622	1778
2-2016-01-06-04-10-01	2016-01-06	04:10:00	DeKUWC	-0.387812	36.9622	1778
2-2016-01-06-04-15-01	2016-01-06	04:15:00	DeKUWC	-0.387812	36.9622	1778
2-2016-01-06-04-20-02	2016-01-06	04:20:00	DeKUWC	-0.387812	36.9622	1778
2-2016-01-06-04-25-01	2016-01-06	04:25:00	DeKUWC	-0.387812	36.9622	1778
2-2016-01-06-04-30-01	2016-01-06	04:30:00	DeKUWC	-0.387812	36.9622	1778
2-2016-01-06-04-35-01	2016-01-06	04:35:00	DeKUWC	-0.387812	36.9622	1778
2-2016-01-06-04-40-01	2016-01-06	04:40:00	DeKUWC	-0.387812	36.9622	1778
2-2016-01-06-04-45-01	2016-01-06	04:45:00	DeKUWC	-0.387812	36.9622	1778
2-2016-01-06-04-50-01	2016-01-06	04:50:00	DeKUWC	-0.387812	36.9622	1778
2-2016-01-06-04-55-01	2016-01-06	04:55:00	DeKUWC	-0.387812	36.9622	1778
2-2016-01-06-05-00-01	2016-01-06	05:00:00	DeKUWC	-0.387812	36.9622	1778
2-2016-01-06-05-05-01	2016-01-06	05:05:00	DeKUWC	-0.387812	36.9622	1778
2-2016-01-06-05-10-01	2016-01-06	05:10:00	DeKUWC	-0.387812	36.9622	1778
2-2016-01-06-05-15-01	2016-01-06	05:15:00	DeKUWC	-0.387812	36.9622	1778
2-2016-01-06-05-20-02	2016-01-06	05:20:00	DeKUWC	-0.387812	36.9622	1778
2-2016-01-06-05-25-01	2016-01-06	05:25:00	DeKUWC	-0.387812	36.9622	1778
2-2016-01-06-05-30-01	2016-01-06	05:30:00	DeKUWC	-0.387812	36.9622	1778
2-2016-01-06-05-35-01	2016-01-06	05:35:00	DeKUWC	-0.387812	36.9622	1778
2-2016-01-06-05-40-01	2016-01-06	05:40:00	DeKUWC	-0.387812	36.9622	1778
2-2016-01-06-05-45-01	2016-01-06	05:45:00	DeKUWC	-0.387812	36.9622	1778
2-2016-01-06-05-50-01	2016-01-06	05:50:00	DeKUWC	-0.387812	36.9622	1778
2-2016-01-06-05-55-01	2016-01-06	05:55:00	DeKUWC	-0.387812	36.9622	1778
2-2016-01-06-06-00-01	2016-01-06	06:00:00	DeKUWC	-0.387812	36.9622	1778
2-2016-01-06-06-05-01	2016-01-06	06:05:00	DeKUWC	-0.387812	36.9622	1778
2-2016-01-06-06-10-01	2016-01-06	06:10:00	DeKUWC	-0.387812	36.9622	1778
2-2016-01-06-06-15-01	2016-01-06	06:15:00	DeKUWC	-0.387812	36.9622	1778
2-2016-01-06-06-20-01	2016-01-06	06:20:00	DeKUWC	-0.387812	36.9622	1778
2-2016-01-06-06-25-01	2016-01-06	06:25:00	DeKUWC	-0.387812	36.9622	1778
2-2016-01-06-06-30-01	2016-01-06	06:30:00	DeKUWC	-0.387812	36.9622	1778
2-2016-01-06-06-35-01	2016-01-06	06:35:00	DeKUWC	-0.387812	36.9622	1778
2-2016-01-06-06-40-02	2016-01-06	06:40:00	DeKUWC	-0.387812	36.9622	1778
2-2016-01-06-06-45-01	2016-01-06	06:45:00	DeKUWC	-0.387812	36.9622	1778
2-2016-01-06-06-50-01	2016-01-06	06:50:00	DeKUWC	-0.387812	36.9622	1778	COBU;GBCA;TRBO	YRTI;TADO
2-2016-01-06-06-55-01	2016-01-06	06:55:00	DeKUWC	-0.387812	36.9622	1778
2-2016-01-06-07-00-01	2016-01-06	07:00:00	DeKUWC	-0.387812	36.9622	1778
2-2016-01-06-07-05-01	2016-01-06	07:05:00	DeKUWC	-0.387812	36.9622	1778
2-2016-01-06-07-10-01	2016-01-06	07:10:00	DeKUWC	-0.387812	36.9622	1778
2-2016-01-06-07-15-01	2016-01-06	07:15:00	DeKUWC	-0.387812	36.9622	1778	YRTI;GBCA	YWGR;TADO
2-2016-01-06-07-20-01	2016-01-06	07:20:00	DeKUWC	-0.387812	36.9622	1778	YWGR;GBCA	YRTI
2-2016-01-06-07-25-01	2016-01-06	07:25:00	DeKUWC	-0.387812	36.9622	1778
2-2016-01-06-07-30-01	2016-01-06	07:30:00	DeKUWC	-0.387812	36.9622	1778
2-2016-01-06-07-35-02	2016-01-06	07:35:00	DeKUWC	-0.387812	36.9622	1778
2-2016-01-06-07-40-01	2016-01-06	07:40:00	DeKUWC	-0.387812	36.9622	1778
2-2016-01-06-07-45-01	2016-01-06	07:45:00	DeKUWC	-0.387812	36.9622	1778	TRBO;GBCA	TADO
2-2016-01-06-07-50-01	2016-01-06	07:50:00	DeKUWC	-0.387812	36.9622	1778
2-2016-01-06-07-55-01	2016-01-06	07:55:00	DeKUWC	-0.387812	36.9622	1778
2-2016-01-06-08-00-01	2016-01-06	08:00:00	DeKUWC	-0.387812	36.9622	1778
2-2016-01-06-08-05-01	2016-01-06	08:05:00	DeKUWC	-0.387812	36.9622	1778
2-2016-01-06-08-10-01	2016-01-06	08:10:00	DeKUWC	-0.387812	36.9622	1778
2-2016-01-06-08-15-01	2016-01-06	08:15:00	DeKUWC	-0.387812	36.9622	1778
2-2016-01-06-08-20-01	2016-01-06	08:20:00	DeKUWC	-0.387812	36.9622	1778	YWGR;YRTI	TADO;CHBA
2-2016-01-06-08-25-01	2016-01-06	08:25:00	DeKUWC	-0.387812	36.9622	1778
2-2016-01-06-08-30-02	2016-01-06	08:30:00	DeKUWC	-0.387812	36.9622	1778	YWGR;TRBO;GBCA	TADO
2-2016-01-06-08-35-01	2016-01-06	08:35:00	DeKUWC	-0.387812	36.9622	1778
2-2016-01-06-08-40-01	2016-01-06	08:40:00	DeKUWC	-0.387812	36.9622	1778
2-2016-01-06-08-45-01	2016-01-06	08:45:00	DeKUWC	-0.387812	36.9622	1778
2-2016-01-06-08-50-01	2016-01-06	08:50:00	DeKUWC	-0.387812	36.9622	1778	GBCA;TADO	TRBO;YRTI;YBAP
2-2016-01-06-08-55-01	2016-01-06	08:55:00	DeKUWC	-0.387812	36.9622	1778	YWGR;GBCA	YRTI;TADO
2-2016-01-06-09-00-01	2016-01-06	09:00:00	DeKUWC	-0.387812	36.9622	1778
2-2016-01-06-09-05-01	2016-01-06	09:05:00	DeKUWC	-0.387812	36.9622	1778
2-2016-01-06-09-10-01	2016-01-06	09:10:00	DeKUWC	-0.387812	36.9622	1778
2-2016-01-06-09-15-01	2016-01-06	09:15:00	DeKUWC	-0.387812	36.9622	1778
2-2016-01-06-09-20-01	2016-01-06	09:20:00	DeKUWC	-0.387812	36.9622	1778
2-2016-01-06-09-25-02	2016-01-06	09:25:00	DeKUWC	-0.387812	36.9622	1778
2-2016-01-06-09-30-01	2016-01-06	09:30:00	DeKUWC	-0.387812	36.9622	1778
2-2016-01-06-09-35-01	2016-01-06	09:35:00	DeKUWC	-0.387812	36.9622	1778
2-2016-01-06-09-40-01	2016-01-06	09:40:00	DeKUWC	-0.387812	36.9622	1778	GBCA;YWGR	TADO
2-2016-01-06-09-45-01	2016-01-06	09:45:00	DeKUWC	-0.387812	36.9622	1778
2-2016-01-06-09-50-01	2016-01-06	09:50:00	DeKUWC	-0.387812	36.9622	1778
2-2016-01-06-09-55-01	2016-01-06	09:55:00	DeKUWC	-0.387812	36.9622	1778
2-2016-01-06-10-00-01	2016-01-06	10:00:00	DeKUWC	-0.387812	36.9622	1778
2-2016-01-06-10-05-01	2016-01-06	10:05:00	DeKUWC	-0.387812	36.9622	1778
2-2016-01-06-10-10-01	2016-01-06	10:10:00	DeKUWC	-0.387812	36.9622	1778
2-2016-01-06-10-15-01	2016-01-06	10:15:00	DeKUWC	-0.387812	36.9622	1778
2-2016-01-06-10-20-02	2016-01-06	10:20:00	DeKUWC	-0.387812	36.9622	1778	YWGR	TADO
2-2016-01-06-10-25-02	2016-01-06	10:25:00	DeKUWC	-0.387812	36.9622	1778	YWGR;YRTI;BBPU	TRBO
2-2016-01-06-10-30-01	2016-01-06	10:30:00	DeKUWC	-0.387812	36.9622	1778
2-2016-01-06-10-35-01	2016-01-06	10:35:00	DeKUWC	-0.387812	36.9622	1778
2-2016-01-06-10-40-01	2016-01-06	10:40:00	DeKUWC	-0.387812	36.9622	1778
2-2016-01-06-10-45-01	2016-01-06	10:45:00	DeKUWC	-0.387812	36.9622	1778
2-2016-01-06-10-50-01	2016-01-06	10:50:00	DeKUWC	-0.387812	36.9622	1778
2-2016-01-06-10-55-01	2016-01-06	10:55:00	DeKUWC	-0.387812	36.9622	1778
2-2016-01-06-11-00-01	2016-01-06	11:00:00	DeKUWC	-0.387812	36.9622	1778
2-2016-01-06-11-05-01	2016-01-06	11:05:00	DeKUWC	-0.387812	36.9622	1778
2-2016-01-06-11-10-01	2016-01-06	11:10:00	DeKUWC	-0.387812	36.9622	1778
2-2016-01-06-11-15-01	2016-01-06	11:15:00	DeKUWC	-0.387812	36.9622	1778
2-2016-01-06-11-20-02	2016-01-06	11:20:00	DeKUWC	-0.387812	36.9622	1778
2-2016-01-06-11-25-01	2016-01-06	11:25:00	DeKUWC	-0.387812	36.9622	1778
2-2016-01-06-11-30-01	2016-01-06	11:30:00	DeKUWC	-0.387812	36.9622	1778		BBPU;GBCA;YWGR;TADO;HATU
2-2016-01-06-11-35-01	2016-01-06	11:35:00	DeKUWC	-0.387812	36.9622	1778
2-2016-01-06-11-40-01	2016-01-06	11:40:00	DeKUWC	-0.387812	36.9622	1778
2-2016-01-06-11-45-01	2016-01-06	11:45:00	DeKUWC	-0.387812	36.9622	1778
2-2016-01-06-11-50-01	2016-01-06	11:50:00	DeKUWC	-0.387812	36.9622	1778
2-2016-01-06-11-55-01	2016-01-06	11:55:00	DeKUWC	-0.387812	36.9622	1778
2-2016-01-06-12-00-01	2016-01-06	12:00:00	DeKUWC	-0.387812	36.9622	1778
2-2016-01-06-12-05-01	2016-01-06	12:05:00	DeKUWC	-0.387812	36.9622	1778
2-2016-01-06-12-10-01	2016-01-06	12:10:00	DeKUWC	-0.387812	36.9622	1778
2-2016-01-06-12-15-01	2016-01-06	12:15:00	DeKUWC	-0.387812	36.9622	1778
2-2016-01-06-12-20-01	2016-01-06	12:20:00	DeKUWC	-0.387812	36.9622	1778	BBPU	GBCA	Aeroplane noise
2-2016-01-06-12-25-01	2016-01-06	12:25:00	DeKUWC	-0.387812	36.9622	1778
2-2016-01-06-12-30-01	2016-01-06	12:30:00	DeKUWC	-0.387812	36.9622	1778
2-2016-01-06-12-35-01	2016-01-06	12:35:00	DeKUWC	-0.387812	36.9622	1778
2-2016-01-06-12-40-01	2016-01-06	12:40:00	DeKUWC	-0.387812	36.9622	1778
2-2016-01-06-12-45-01	2016-01-06	12:45:00	DeKUWC	-0.387812	36.9622	1778
2-2016-01-06-12-50-01	2016-01-06	12:50:00	DeKUWC	-0.387812	36.9622	1778
2-2016-01-06-12-55-01	2016-01-06	12:55:00	DeKUWC	-0.387812	36.9622	1778
2-2016-01-06-13-00-01	2016-01-06	13:00:00	DeKUWC	-0.387812	36.9622	1778
2-2016-01-06-13-05-01	2016-01-06	13:05:00	DeKUWC	-0.387812	36.9622	1778
2-2016-01-06-13-10-01	2016-01-06	13:10:00	DeKUWC	-0.387812	36.9622	1778
2-2016-01-06-13-15-01	2016-01-06	13:15:00	DeKUWC	-0.387812	36.9622	1778	HATU;YWGR
2-2016-01-06-13-20-01	2016-01-06	13:20:00	DeKUWC	-0.387812	36.9622	1778	YWGR;BBPU	TADO;YRTI
2-2016-01-06-13-25-01	2016-01-06	13:25:00	DeKUWC	-0.387812	36.9622	1778
2-2016-01-06-13-30-01	2016-01-06	13:30:00	DeKUWC	-0.387812	36.9622	1778
2-2016-01-06-13-35-01	2016-01-06	13:35:00	DeKUWC	-0.387812	36.9622	1778
2-2016-01-06-13-40-01	2016-01-06	13:40:00	DeKUWC	-0.387812	36.9622	1778
2-2016-01-06-13-45-01	2016-01-06	13:45:00	DeKUWC	-0.387812	36.9622	1778
2-2016-01-06-13-50-01	2016-01-06	13:50:00	DeKUWC	-0.387812	36.9622	1778
2-2016-01-06-13-55-01	2016-01-06	13:55:00	DeKUWC	-0.387812	36.9622	1778
2-2016-01-06-14-00-01	2016-01-06	14:00:00	DeKUWC	-0.387812	36.9622	1778
2-2016-01-06-14-05-01	2016-01-06	14:05:00	DeKUWC	-0.387812	36.9622	1778
2-2016-01-06-14-10-01	2016-01-06	14:10:00	DeKUWC	-0.387812	36.9622	1778
2-2016-01-06-14-15-02	2016-01-06	14:15:00	DeKUWC	-0.387812	36.9622	1778
2-2016-01-06-14-20-01	2016-01-06	14:20:00	DeKUWC	-0.387812	36.9622	1778
2-2016-01-06-14-25-01	2016-01-06	14:25:00	DeKUWC	-0.387812	36.9622	1778
2-2016-01-06-14-30-01	2016-01-06	14:30:00	DeKUWC	-0.387812	36.9622	1778
2-2016-01-06-14-35-01	2016-01-06	14:35:00	DeKUWC	-0.387812	36.9622	1778
2-2016-01-06-14-40-01	2016-01-06	14:40:00	DeKUWC	-0.387812	36.9622	1778
2-2016-01-06-14-45-01	2016-01-06	14:45:00	DeKUWC	-0.387812	36.9622	1778	GBCA	HATU
2-2016-01-06-14-50-01	2016-01-06	14:50:00	DeKUWC	-0.387812	36.9622	1778	YWGR	SFBA;HATU;YRTI
2-2016-01-06-14-55-01	2016-01-06	14:55:00	DeKUWC	-0.387812	36.9622	1778	YWGR;VASU
2-2016-01-06-15-00-01	2016-01-06	15:00:00	DeKUWC	-0.387812	36.9622	1778
2-2016-01-06-15-05-01	2016-01-06	15:05:00	DeKUWC	-0.387812	36.9622	1778
2-2016-01-06-15-10-02	2016-01-06	15:10:00	DeKUWC	-0.387812	36.9622	1778	GBCA;APFL;YWGR
2-2016-01-06-15-15-01	2016-01-06	15:15:00	DeKUWC	-0.387812	36.9622	1778
2-2016-01-06-15-20-01	2016-01-06	15:20:00	DeKUWC	-0.387812	36.9622	1778
2-2016-01-06-15-25-01	2016-01-06	15:25:00	DeKUWC	-0.387812	36.9622	1778
2-2016-01-06-15-30-01	2016-01-06	15:30:00	DeKUWC	-0.387812	36.9622	1778
2-2016-01-06-15-35-01	2016-01-06	15:35:00	DeKUWC	-0.387812	36.9622	1778
2-2016-01-06-15-40-01	2016-01-06	15:40:00	DeKUWC	-0.387812	36.9622	1778
2-2016-01-06-15-45-01	2016-01-06	15:45:00	DeKUWC	-0.387812	36.9622	1778
2-2016-01-06-15-50-01	2016-01-06	15:50:00	DeKUWC	-0.387812	36.9622	1778

## Sheet: 3
Filename	Date	Time	Location	Latitude	Longitude	Elevation	Foreground Species	Background Species	Remarks
3-2016-01-05-12-00-01	2016-01-05	12:00:00	DeKUWC	-0.386748	36.9623	1731
3-2016-01-05-12-05-01	2016-01-05	12:05:00	DeKUWC	-0.386748	36.9623	1731
3-2016-01-05-12-10-01	2016-01-05	12:10:00	DeKUWC	-0.386748	36.9623	1731
3-2016-01-05-12-15-01	2016-01-05	12:15:00	DeKUWC	-0.386748	36.9623	1731
3-2016-01-05-12-20-01	2016-01-05	12:20:00	DeKUWC	-0.386748	36.9623	1731
3-2016-01-05-12-25-01	2016-01-05	12:25:00	DeKUWC	-0.386748	36.9623	1731
3-2016-01-05-12-30-01	2016-01-05	12:30:00	DeKUWC	-0.386748	36.9623	1731
3-2016-01-05-12-35-01	2016-01-05	12:35:00	DeKUWC	-0.386748	36.9623	1731
3-2016-01-05-12-40-01	2016-01-05	12:40:00	DeKUWC	-0.386748	36.9623	1731
3-2016-01-05-12-45-01	2016-01-05	12:45:00	DeKUWC	-0.386748	36.9623	1731
3-2016-01-05-12-50-01	2016-01-05	12:50:00	DeKUWC	-0.386748	36.9623	1731
3-2016-01-05-12-55-01	2016-01-05	12:55:00	DeKUWC	-0.386748	36.9623	1731
3-2016-01-05-13-00-01	2016-01-05	13:00:00	DeKUWC	-0.386748	36.9623	1731
3-2016-01-05-13-05-02	2016-01-05	13:05:00	DeKUWC	-0.386748	36.9623	1731
3-2016-01-05-13-10-01	2016-01-05	13:10:00	DeKUWC	-0.386748	36.9623	1731
3-2016-01-05-13-15-01	2016-01-05	13:15:00	DeKUWC	-0.386748	36.9623	1731
3-2016-01-05-13-20-01	2016-01-05	13:20:00	DeKUWC	-0.386748	36.9623	1731
3-2016-01-05-13-25-01	2016-01-05	13:25:00	DeKUWC	-0.386748	36.9623	1731
3-2016-01-05-13-30-01	2016-01-05	13:30:00	DeKUWC	-0.386748	36.9623	1731
3-2016-01-05-13-35-01	2016-01-05	13:35:00	DeKUWC	-0.386748	36.9623	1731
3-2016-01-05-13-40-01	2016-01-05	13:40:00	DeKUWC	-0.386748	36.9623	1731
3-2016-01-05-13-45-01	2016-01-05	13:45:00	DeKUWC	-0.386748	36.9623	1731
3-2016-01-05-13-50-01	2016-01-05	13:50:00	DeKUWC	-0.386748	36.9623	1731
3-2016-01-05-13-55-01	2016-01-05	13:55:00	DeKUWC	-0.386748	36.9623	1731
3-2016-01-05-14-00-01	2016-01-05	14:00:00	DeKUWC	-0.386748	36.9623	1731
3-2016-01-05-14-05-01	2016-01-05	14:05:00	DeKUWC	-0.386748	36.9623	1731	YWGR	HATU
3-2016-01-05-14-10-01	2016-01-05	14:10:00	DeKUWC	-0.386748	36.9623	1731
3-2016-01-05-14-15-01	2016-01-05	14:15:00	DeKUWC	-0.386748	36.9623	1731	YWGR	TADO
3-2016-01-05-14-20-02	2016-01-05	14:20:00	DeKUWC	-0.386748	36.9623	1731
3-2016-01-05-14-25-01	2016-01-05	14:25:00	DeKUWC	-0.386748	36.9623	1731
3-2016-01-05-14-30-01	2016-01-05	14:30:00	DeKUWC	-0.386748	36.9623	1731
3-2016-01-05-14-35-01	2016-01-05	14:35:00	DeKUWC	-0.386748	36.9623	1731
3-2016-01-05-14-40-01	2016-01-05	14:40:00	DeKUWC	-0.386748	36.9623	1731
3-2016-01-05-14-45-01	2016-01-05	14:45:00	DeKUWC	-0.386748	36.9623	1731
3-2016-01-05-14-50-01	2016-01-05	14:50:00	DeKUWC	-0.386748	36.9623	1731
3-2016-01-05-14-55-01	2016-01-05	14:55:00	DeKUWC	-0.386748	36.9623	1731
3-2016-01-05-15-00-01	2016-01-05	15:00:00	DeKUWC	-0.386748	36.9623	1731
3-2016-01-05-15-05-01	2016-01-05	15:05:00	DeKUWC	-0.386748	36.9623	1731
3-2016-01-05-15-10-01	2016-01-05	15:10:00	DeKUWC	-0.386748	36.9623	1731
3-2016-01-05-15-15-01	2016-01-05	15:15:00	DeKUWC	-0.386748	36.9623	1731
3-2016-01-05-15-20-01	2016-01-05	15:20:00	DeKUWC	-0.386748	36.9623	1731
3-2016-01-05-15-25-01	2016-01-05	15:25:00	DeKUWC	-0.386748	36.9623	1731
3-2016-01-05-15-30-01	2016-01-05	15:30:00	DeKUWC	-0.386748	36.9623	1731
3-2016-01-05-15-35-01	2016-01-05	15:35:00	DeKUWC	-0.386748	36.9623	1731
3-2016-01-05-15-40-02	2016-01-05	15:40:00	DeKUWC	-0.386748	36.9623	1731
3-2016-01-05-15-45-02	2016-01-05	15:45:00	DeKUWC	-0.386748	36.9623	1731
3-2016-01-05-15-50-01	2016-01-05	15:50:00	DeKUWC	-0.386748	36.9623	1731
3-2016-01-05-15-55-01	2016-01-05	15:55:00	DeKUWC	-0.386748	36.9623	1731
3-2016-01-05-16-00-01	2016-01-05	16:00:00	DeKUWC	-0.386748	36.9623	1731
3-2016-01-05-16-05-01	2016-01-05	16:05:00	DeKUWC	-0.386748	36.9623	1731		GBCA;YWGR;YRTI
3-2016-01-05-16-10-01	2016-01-05	16:10:00	DeKUWC	-0.386748	36.9623	1731
3-2016-01-05-16-15-01	2016-01-05	16:15:00	DeKUWC	-0.386748	36.9623	1731
3-2016-01-05-16-20-01	2016-01-05	16:20:00	DeKUWC	-0.386748	36.9623	1731
3-2016-01-05-16-25-01	2016-01-05	16:25:00	DeKUWC	-0.386748	36.9623	1731
3-2016-01-05-16-30-01	2016-01-05	16:30:00	DeKUWC	-0.386748	36.9623	1731
3-2016-01-05-16-35-01	2016-01-05	16:35:00	DeKUWC	-0.386748	36.9623	1731
3-2016-01-05-16-40-01	2016-01-05	16:40:00	DeKUWC	-0.386748	36.9623	1731
3-2016-01-05-16-45-01	2016-01-05	16:45:00	DeKUWC	-0.386748	36.9623	1731
3-2016-01-05-16-50-01	2016-01-05	16:50:00	DeKUWC	-0.386748	36.9623	1731
3-2016-01-05-16-55-01	2016-01-05	16:55:00	DeKUWC	-0.386748	36.9623	1731
3-2016-01-05-17-00-01	2016-01-05	17:00:00	DeKUWC	-0.386748	36.9623	1731
3-2016-01-05-17-05-02	2016-01-05	17:05:00	DeKUWC	-0.386748	36.9623	1731
3-2016-01-05-17-10-01	2016-01-05	17:10:00	DeKUWC	-0.386748	36.9623	1731		HATU
3-2016-01-05-17-15-01	2016-01-05	17:15:00	DeKUWC	-0.386748	36.9623	1731
3-2016-01-05-17-20-01	2016-01-05	17:20:00	DeKUWC	-0.386748	36.9623	1731
3-2016-01-05-17-25-01	2016-01-05	17:25:00	DeKUWC	-0.386748	36.9623	1731
3-2016-01-05-17-30-01	2016-01-05	17:30:00	DeKUWC	-0.386748	36.9623	1731
3-2016-01-05-17-35-01	2016-01-05	17:35:00	DeKUWC	-0.386748	36.9623	1731	COBU	HATU
3-2016-01-05-17-40-01	2016-01-05	17:40:00	DeKUWC	-0.386748	36.9623	1731
3-2016-01-05-17-45-01	2016-01-05	17:45:00	DeKUWC	-0.386748	36.9623	1731
3-2016-01-05-17-50-01	2016-01-05	17:50:00	DeKUWC	-0.386748	36.9623	1731
3-2016-01-05-17-55-01	2016-01-05	17:55:00	DeKUWC	-0.386748	36.9623	1731
3-2016-01-05-18-00-01	2016-01-05	18:00:00	DeKUWC	-0.386748	36.9623	1731
3-2016-01-05-18-05-01	2016-01-05	18:05:00	DeKUWC	-0.386748	36.9623	1731	TADO;YWGR;HATU
3-2016-01-05-18-10-01	2016-01-05	18:10:00	DeKUWC	-0.386748	36.9623	1731	YWGR	HATU
3-2016-01-05-18-15-01	2016-01-05	18:15:00	DeKUWC	-0.386748	36.9623	1731
3-2016-01-05-18-20-02	2016-01-05	18:20:00	DeKUWC	-0.386748	36.9623	1731
3-2016-01-05-18-25-01	2016-01-05	18:25:00	DeKUWC	-0.386748	36.9623	1731
3-2016-01-05-18-30-01	2016-01-05	18:30:00	DeKUWC	-0.386748	36.9623	1731
3-2016-01-05-18-35-01	2016-01-05	18:35:00	DeKUWC	-0.386748	36.9623	1731
3-2016-01-05-18-40-01	2016-01-05	18:40:00	DeKUWC	-0.386748	36.9623	1731
3-2016-01-05-18-45-01	2016-01-05	18:45:00	DeKUWC	-0.386748	36.9623	1731
3-2016-01-05-18-50-01	2016-01-05	18:50:00	DeKUWC	-0.386748	36.9623	1731
3-2016-01-05-18-55-01	2016-01-05	18:55:00	DeKUWC	-0.386748	36.9623	1731
3-2016-01-05-19-00-01	2016-01-05	19:00:00	DeKUWC	-0.386748	36.9623	1731
3-2016-01-05-19-05-01	2016-01-05	19:05:00	DeKUWC	-0.386748	36.9623	1731
3-2016-01-05-19-10-01	2016-01-05	19:10:00	DeKUWC	-0.386748	36.9623	1731
3-2016-01-05-19-15-01	2016-01-05	19:15:00	DeKUWC	-0.386748	36.9623	1731
3-2016-01-05-19-20-01	2016-01-05	19:20:00	DeKUWC	-0.386748	36.9623	1731
3-2016-01-05-19-25-01	2016-01-05	19:25:00	DeKUWC	-0.386748	36.9623	1731
3-2016-01-05-19-30-01	2016-01-05	19:30:00	DeKUWC	-0.386748	36.9623	1731
3-2016-01-05-19-35-01	2016-01-05	19:35:00	DeKUWC	-0.386748	36.9623	1731
3-2016-01-05-19-40-01	2016-01-05	19:40:00	DeKUWC	-0.386748	36.9623	1731
3-2016-01-05-19-45-02	2016-01-05	19:45:00	DeKUWC	-0.386748	36.9623	1731
3-2016-01-05-19-50-01	2016-01-05	19:50:00	DeKUWC	-0.386748	36.9623	1731
3-2016-01-05-19-55-01	2016-01-05	19:55:00	DeKUWC	-0.386748	36.9623	1731
3-2016-01-05-20-00-01	2016-01-05	20:00:00	DeKUWC	-0.386748	36.9623	1731
3-2016-01-05-20-05-01	2016-01-05	20:05:00	DeKUWC	-0.386748	36.9623	1731
3-2016-01-05-20-10-01	2016-01-05	20:10:00	DeKUWC	-0.386748	36.9623	1731
3-2016-01-05-20-15-01	2016-01-05	20:15:00	DeKUWC	-0.386748	36.9623	1731
3-2016-01-05-20-20-01	2016-01-05	20:20:00	DeKUWC	-0.386748	36.9623	1731
3-2016-01-05-20-25-01	2016-01-05	20:25:00	DeKUWC	-0.386748	36.9623	1731
3-2016-01-05-20-30-01	2016-01-05	20:30:00	DeKUWC	-0.386748	36.9623	1731
3-2016-01-05-20-35-01	2016-01-05	20:35:00	DeKUWC	-0.386748	36.9623	1731
3-2016-01-05-20-40-01	2016-01-05	20:40:00	DeKUWC	-0.386748	36.9623	1731
3-2016-01-05-20-45-02	2016-01-05	20:45:00	DeKUWC	-0.386748	36.9623	1731
3-2016-01-05-20-50-01	2016-01-05	20:50:00	DeKUWC	-0.386748	36.9623	1731
3-2016-01-05-20-55-01	2016-01-05	20:55:00	DeKUWC	-0.386748	36.9623	1731
3-2016-01-05-21-00-01	2016-01-05	21:00:00	DeKUWC	-0.386748	36.9623	1731
3-2016-01-05-21-05-01	2016-01-05	21:05:00	DeKUWC	-0.386748	36.9623	1731
3-2016-01-05-21-10-01	2016-01-05	21:10:00	DeKUWC	-0.386748	36.9623	1731
3-2016-01-05-21-15-01	2016-01-05	21:15:00	DeKUWC	-0.386748	36.9623	1731
3-2016-01-05-21-20-01	2016-01-05	21:20:00	DeKUWC	-0.386748	36.9623	1731
3-2016-01-05-21-25-01	2016-01-05	21:25:00	DeKUWC	-0.386748	36.9623	1731
3-2016-01-05-21-30-01	2016-01-05	21:30:00	DeKUWC	-0.386748	36.9623	1731
3-2016-01-05-21-35-01	2016-01-05	21:35:00	DeKUWC	-0.386748	36.9623	1731
3-2016-01-05-21-40-02	2016-01-05	21:40:00	DeKUWC	-0.386748	36.9623	1731
3-2016-01-05-21-45-01	2016-01-05	21:45:00	DeKUWC	-0.386748	36.9623	1731
3-2016-01-05-21-50-01	2016-01-05	21:50:00	DeKUWC	-0.386748	36.9623	1731
3-2016-01-05-21-55-01	2016-01-05	21:55:00	DeKUWC	-0.386748	36.9623	1731
3-2016-01-05-22-00-01	2016-01-05	22:00:00	DeKUWC	-0.386748	36.9623	1731
3-2016-01-05-22-05-01	2016-01-05	22:05:00	DeKUWC	-0.386748	36.9623	1731
3-2016-01-05-22-10-01	2016-01-05	22:10:00	DeKUWC	-0.386748	36.9623	1731
3-2016-01-05-22-15-01	2016-01-05	22:15:00	DeKUWC	-0.386748	36.9623	1731
3-2016-01-05-22-20-01	2016-01-05	22:20:00	DeKUWC	-0.386748	36.9623	1731
3-2016-01-05-22-25-01	2016-01-05	22:25:00	DeKUWC	-0.386748	36.9623	1731
3-2016-01-05-22-30-01	2016-01-05	22:30:00	DeKUWC	-0.386748	36.9623	1731
3-2016-01-05-22-35-02	2016-01-05	22:35:00	DeKUWC	-0.386748	36.9623	1731
3-2016-01-05-22-40-02	2016-01-05	22:40:00	DeKUWC	-0.386748	36.9623	1731
3-2016-01-05-22-45-01	2016-01-05	22:45:00	DeKUWC	-0.386748	36.9623	1731
3-2016-01-05-22-50-01	2016-01-05	22:50:00	DeKUWC	-0.386748	36.9623	1731
3-2016-01-05-22-55-01	2016-01-05	22:55:00	DeKUWC	-0.386748	36.9623	1731
3-2016-01-05-23-00-01	2016-01-05	23:00:00	DeKUWC	-0.386748	36.9623	1731
3-2016-01-05-23-05-01	2016-01-05	23:05:00	DeKUWC	-0.386748	36.9623	1731
3-2016-01-05-23-10-01	2016-01-05	23:10:00	DeKUWC	-0.386748	36.9623	1731
3-2016-01-05-23-15-01	2016-01-05	23:15:00	DeKUWC	-0.386748	36.9623	1731
3-2016-01-05-23-20-01	2016-01-05	23:20:00	DeKUWC	-0.386748	36.9623	1731
3-2016-01-05-23-25-01	2016-01-05	23:25:00	DeKUWC	-0.386748	36.9623	1731
3-2016-01-05-23-30-01	2016-01-05	23:30:00	DeKUWC	-0.386748	36.9623	1731
3-2016-01-05-23-35-02	2016-01-05	23:35:00	DeKUWC	-0.386748	36.9623	1731
3-2016-01-05-23-40-01	2016-01-05	23:40:00	DeKUWC	-0.386748	36.9623	1731
3-2016-01-05-23-45-01	2016-01-05	23:45:00	DeKUWC	-0.386748	36.9623	1731
3-2016-01-05-23-50-01	2016-01-05	23:50:00	DeKUWC	-0.386748	36.9623	1731
3-2016-01-05-23-55-01	2016-01-05	23:55:00	DeKUWC	-0.386748	36.9623	1731
3-2016-01-06-00-00-01	2016-01-06	00:00:00	DeKUWC	-0.386748	36.9623	1731
3-2016-01-06-00-05-01	2016-01-06	00:05:00	DeKUWC	-0.386748	36.9623	1731
3-2016-01-06-00-10-01	2016-01-06	00:10:00	DeKUWC	-0.386748	36.9623	1731
3-2016-01-06-00-15-01	2016-01-06	00:15:00	DeKUWC	-0.386748	36.9623	1731
3-2016-01-06-00-20-01	2016-01-06	00:20:00	DeKUWC	-0.386748	36.9623	1731
3-2016-01-06-00-25-01	2016-01-06	00:25:00	DeKUWC	-0.386748	36.9623	1731
3-2016-01-06-00-30-02	2016-01-06	00:30:00	DeKUWC	-0.386748	36.9623	1731
3-2016-01-06-00-35-01	2016-01-06	00:35:00	DeKUWC	-0.386748	36.9623	1731
3-2016-01-06-00-40-01	2016-01-06	00:40:00	DeKUWC	-0.386748	36.9623	1731
3-2016-01-06-00-45-01	2016-01-06	00:45:00	DeKUWC	-0.386748	36.9623	1731
3-2016-01-06-00-50-01	2016-01-06	00:50:00	DeKUWC	-0.386748	36.9623	1731
3-2016-01-06-00-55-01	2016-01-06	00:55:00	DeKUWC	-0.386748	36.9623	1731
3-2016-01-06-01-00-01	2016-01-06	01:00:00	DeKUWC	-0.386748	36.9623	1731
3-2016-01-06-01-05-01	2016-01-06	01:05:00	DeKUWC	-0.386748	36.9623	1731
3-2016-01-06-01-10-01	2016-01-06	01:10:00	DeKUWC	-0.386748	36.9623	1731
3-2016-01-06-01-15-01	2016-01-06	01:15:00	DeKUWC	-0.386748	36.9623	1731
3-2016-01-06-01-20-01	2016-01-06	01:20:00	DeKUWC	-0.386748	36.9623	1731
3-2016-01-06-01-25-02	2016-01-06	01:25:00	DeKUWC	-0.386748	36.9623	1731
3-2016-01-06-01-30-01	2016-01-06	01:30:00	DeKUWC	-0.386748	36.9623	1731
3-2016-01-06-01-35-01	2016-01-06	01:35:00	DeKUWC	-0.386748	36.9623	1731
3-2016-01-06-01-40-01	2016-01-06	01:40:00	DeKUWC	-0.386748	36.9623	1731
3-2016-01-06-01-45-01	2016-01-06	01:45:00	DeKUWC	-0.386748	36.9623	1731
3-2016-01-06-01-50-01	2016-01-06	01:50:00	DeKUWC	-0.386748	36.9623	1731
3-2016-01-06-01-55-01	2016-01-06	01:55:00	DeKUWC	-0.386748	36.9623	1731
3-2016-01-06-02-00-01	2016-01-06	02:00:00	DeKUWC	-0.386748	36.9623	1731
3-2016-01-06-02-05-01	2016-01-06	02:05:00	DeKUWC	-0.386748	36.9623	1731
3-2016-01-06-02-10-01	2016-01-06	02:10:00	DeKUWC	-0.386748	36.9623	1731
3-2016-01-06-02-15-01	2016-01-06	02:15:00	DeKUWC	-0.386748	36.9623	1731
3-2016-01-06-02-20-01	2016-01-06	02:20:00	DeKUWC	-0.386748	36.9623	1731
3-2016-01-06-02-25-02	2016-01-06	02:25:00	DeKUWC	-0.386748	36.9623	1731
3-2016-01-06-02-30-01	2016-01-06	02:30:00	DeKUWC	-0.386748	36.9623	1731
3-2016-01-06-02-35-01	2016-01-06	02:35:00	DeKUWC	-0.386748	36.9623	1731
3-2016-01-06-02-40-01	2016-01-06	02:40:00	DeKUWC	-0.386748	36.9623	1731
3-2016-01-06-02-45-01	2016-01-06	02:45:00	DeKUWC	-0.386748	36.9623	1731
3-2016-01-06-02-50-01	2016-01-06	02:50:00	DeKUWC	-0.386748	36.9623	1731
3-2016-01-06-02-55-01	2016-01-06	02:55:00	DeKUWC	-0.386748	36.9623	1731
3-2016-01-06-03-00-01	2016-01-06	03:00:00	DeKUWC	-0.386748	36.9623	1731
3-2016-01-06-03-05-01	2016-01-06	03:05:00	DeKUWC	-0.386748	36.9623	1731
3-2016-01-06-03-10-01	2016-01-06	03:10:00	DeKUWC	-0.386748	36.9623	1731
3-2016-01-06-03-15-01	2016-01-06	03:15:00	DeKUWC	-0.386748	36.9623	1731
3-2016-01-06-03-20-02	2016-01-06	03:20:00	DeKUWC	-0.386748	36.9623	1731
3-2016-01-06-03-25-01	2016-01-06	03:25:00	DeKUWC	-0.386748	36.9623	1731
3-2016-01-06-03-30-01	2016-01-06	03:30:00	DeKUWC	-0.386748	36.9623	1731
3-2016-01-06-03-35-01	2016-01-06	03:35:00	DeKUWC	-0.386748	36.9623	1731
3-2016-01-06-03-40-01	2016-01-06	03:40:00	DeKUWC	-0.386748	36.9623	1731
3-2016-01-06-03-45-01	2016-01-06	03:45:00	DeKUWC	-0.386748	36.9623	1731
3-2016-01-06-03-50-01	2016-01-06	03:50:00	DeKUWC	-0.386748	36.9623	1731
3-2016-01-06-03-55-01	2016-01-06	03:55:00	DeKUWC	-0.386748	36.9623	1731
3-2016-01-06-04-00-01	2016-01-06	04:00:00	DeKUWC	-0.386748	36.9623	1731
3-2016-01-06-04-05-01	2016-01-06	04:05:00	DeKUWC	-0.386748	36.9623	1731
3-2016-01-06-04-10-01	2016-01-06	04:10:00	DeKUWC	-0.386748	36.9623	1731
3-2016-01-06-04-15-01	2016-01-06	04:15:00	DeKUWC	-0.386748	36.9623	1731
3-2016-01-06-04-20-01	2016-01-06	04:20:00	DeKUWC	-0.386748	36.9623	1731
3-2016-01-06-04-25-01	2016-01-06	04:25:00	DeKUWC	-0.386748	36.9623	1731
3-2016-01-06-04-30-01	2016-01-06	04:30:00	DeKUWC	-0.386748	36.9623	1731
3-2016-01-06-04-35-01	2016-01-06	04:35:00	DeKUWC	-0.386748	36.9623	1731
3-2016-01-06-04-40-01	2016-01-06	04:40:00	DeKUWC	-0.386748	36.9623	1731
3-2016-01-06-04-45-01	2016-01-06	04:45:00	DeKUWC	-0.386748	36.9623	1731
3-2016-01-06-04-50-01	2016-01-06	04:50:00	DeKUWC	-0.386748	36.9623	1731
3-2016-01-06-04-55-01	2016-01-06	04:55:00	DeKUWC	-0.386748	36.9623	1731
3-2016-01-06-05-00-01	2016-01-06	05:00:00	DeKUWC	-0.386748	36.9623	1731
3-2016-01-06-05-05-01	2016-01-06	05:05:00	DeKUWC	-0.386748	36.9623	1731
3-2016-01-06-05-10-01	2016-01-06	05:10:00	DeKUWC	-0.386748	36.9623	1731
3-2016-01-06-05-15-01	2016-01-06	05:15:00	DeKUWC	-0.386748	36.9623	1731
3-2016-01-06-05-20-01	2016-01-06	05:20:00	DeKUWC	-0.386748	36.9623	1731
3-2016-01-06-05-25-01	2016-01-06	05:25:00	DeKUWC	-0.386748	36.9623	1731
3-2016-01-06-05-30-01	2016-01-06	05:30:00	DeKUWC	-0.386748	36.9623	1731
3-2016-01-06-05-35-01	2016-01-06	05:35:00	DeKUWC	-0.386748	36.9623	1731
3-2016-01-06-05-40-01	2016-01-06	05:40:00	DeKUWC	-0.386748	36.9623	1731
3-2016-01-06-05-45-01	2016-01-06	05:45:00	DeKUWC	-0.386748	36.9623	1731
3-2016-01-06-05-50-01	2016-01-06	05:50:00	DeKUWC	-0.386748	36.9623	1731
3-2016-01-06-05-55-01	2016-01-06	05:55:00	DeKUWC	-0.386748	36.9623	1731
3-2016-01-06-06-00-01	2016-01-06	06:00:00	DeKUWC	-0.386748	36.9623	1731
3-2016-01-06-06-05-01	2016-01-06	06:05:00	DeKUWC	-0.386748	36.9623	1731
3-2016-01-06-06-10-01	2016-01-06	06:10:00	DeKUWC	-0.386748	36.9623	1731
3-2016-01-06-06-15-01	2016-01-06	06:15:00	DeKUWC	-0.386748	36.9623	1731
3-2016-01-06-06-20-01	2016-01-06	06:20:00	DeKUWC	-0.386748	36.9623	1731
3-2016-01-06-06-25-01	2016-01-06	06:25:00	DeKUWC	-0.386748	36.9623	1731	TRBO;YWGR	TADO
3-2016-01-06-06-30-01	2016-01-06	06:30:00	DeKUWC	-0.386748	36.9623	1731
3-2016-01-06-06-35-01	2016-01-06	06:35:00	DeKUWC	-0.386748	36.9623	1731
3-2016-01-06-06-40-01	2016-01-06	06:40:00	DeKUWC	-0.386748	36.9623	1731
3-2016-01-06-06-45-01	2016-01-06	06:45:00	DeKUWC	-0.386748	36.9623	1731	HATU;COSU;YWGR	GBCA;YRTI	Possibly a Kingfisher at 34 seconds
3-2016-01-06-06-50-01	2016-01-06	06:50:00	DeKUWC	-0.386748	36.9623	1731
3-2016-01-06-06-55-01	2016-01-06	06:55:00	DeKUWC	-0.386748	36.9623	1731
3-2016-01-06-07-00-01	2016-01-06	07:00:00	DeKUWC	-0.386748	36.9623	1731
3-2016-01-06-07-05-01	2016-01-06	07:05:00	DeKUWC	-0.386748	36.9623	1731
3-2016-01-06-07-10-01	2016-01-06	07:10:00	DeKUWC	-0.386748	36.9623	1731
3-2016-01-06-07-15-01	2016-01-06	07:15:00	DeKUWC	-0.386748	36.9623	1731
3-2016-01-06-07-20-01	2016-01-06	07:20:00	DeKUWC	-0.386748	36.9623	1731
3-2016-01-06-07-25-01	2016-01-06	07:25:00	DeKUWC	-0.386748	36.9623	1731
3-2016-01-06-07-30-01	2016-01-06	07:30:00	DeKUWC	-0.386748	36.9623	1731
3-2016-01-06-07-35-01	2016-01-06	07:35:00	DeKUWC	-0.386748	36.9623	1731
3-2016-01-06-07-40-02	2016-01-06	07:40:00	DeKUWC	-0.386748	36.9623	1731
3-2016-01-06-07-45-01	2016-01-06	07:45:00	DeKUWC	-0.386748	36.9623	1731
3-2016-01-06-07-50-01	2016-01-06	07:50:00	DeKUWC	-0.386748	36.9623	1731	YWGR	TADO;HATU
3-2016-01-06-07-55-01	2016-01-06	07:55:00	DeKUWC	-0.386748	36.9623	1731
3-2016-01-06-08-00-01	2016-01-06	08:00:00	DeKUWC	-0.386748	36.9623	1731	YWGR;TADO;HATU	GBCA
3-2016-01-06-08-05-01	2016-01-06	08:05:00	DeKUWC	-0.386748	36.9623	1731	TADO;YWGR;HATU	BLCU;BWWA
3-2016-01-06-08-10-01	2016-01-06	08:10:00	DeKUWC	-0.386748	36.9623	1731
3-2016-01-06-08-15-01	2016-01-06	08:15:00	DeKUWC	-0.386748	36.9623	1731
3-2016-01-06-08-20-01	2016-01-06	08:20:00	DeKUWC	-0.386748	36.9623	1731
3-2016-01-06-08-25-01	2016-01-06	08:25:00	DeKUWC	-0.386748	36.9623	1731	YRTI;TADO	YWGR	Robin-Chat mimicking other birds
3-2016-01-06-08-30-01	2016-01-06	08:30:00	DeKUWC	-0.386748	36.9623	1731	YRTI;TADO	YWGR;HATU	Robin-Chat mimicking other birds
3-2016-01-06-08-35-01	2016-01-06	08:35:00	DeKUWC	-0.386748	36.9623	1731	TADO;YWGR;HATU
3-2016-01-06-08-40-01	2016-01-06	08:40:00	DeKUWC	-0.386748	36.9623	1731
3-2016-01-06-08-45-01	2016-01-06	08:45:00	DeKUWC	-0.386748	36.9623	1731
3-2016-01-06-08-50-01	2016-01-06	08:50:00	DeKUWC	-0.386748	36.9623	1731
3-2016-01-06-08-55-01	2016-01-06	08:55:00	DeKUWC	-0.386748	36.9623	1731
3-2016-01-06-09-00-01	2016-01-06	09:00:00	DeKUWC	-0.386748	36.9623	1731
3-2016-01-06-09-05-02	2016-01-06	09:05:00	DeKUWC	-0.386748	36.9623	1731	YWGR	GBCA;HATU;TADO
3-2016-01-06-09-10-01	2016-01-06	09:10:00	DeKUWC	-0.386748	36.9623	1731
3-2016-01-06-09-15-01	2016-01-06	09:15:00	DeKUWC	-0.386748	36.9623	1731
3-2016-01-06-09-20-01	2016-01-06	09:20:00	DeKUWC	-0.386748	36.9623	1731
3-2016-01-06-09-25-01	2016-01-06	09:25:00	DeKUWC	-0.386748	36.9623	1731
3-2016-01-06-09-30-01	2016-01-06	09:30:00	DeKUWC	-0.386748	36.9623	1731
3-2016-01-06-09-35-01	2016-01-06	09:35:00	DeKUWC	-0.386748	36.9623	1731		TADO;GBCA;YWGR
3-2016-01-06-09-40-01	2016-01-06	09:40:00	DeKUWC	-0.386748	36.9623	1731	YRTI;HATU;TADO;YWGR
3-2016-01-06-09-45-01	2016-01-06	09:45:00	DeKUWC	-0.386748	36.9623	1731
3-2016-01-06-09-50-01	2016-01-06	09:50:00	DeKUWC	-0.386748	36.9623	1731
3-2016-01-06-09-55-01	2016-01-06	09:55:00	DeKUWC	-0.386748	36.9623	1731
3-2016-01-06-10-00-01	2016-01-06	10:00:00	DeKUWC	-0.386748	36.9623	1731
3-2016-01-06-10-05-01	2016-01-06	10:05:00	DeKUWC	-0.386748	36.9623	1731
3-2016-01-06-10-10-01	2016-01-06	10:10:00	DeKUWC	-0.386748	36.9623	1731
3-2016-01-06-10-15-01	2016-01-06	10:15:00	DeKUWC	-0.386748	36.9623	1731
3-2016-01-06-10-20-02	2016-01-06	10:20:00	DeKUWC	-0.386748	36.9623	1731
3-2016-01-06-10-25-01	2016-01-06	10:25:00	DeKUWC	-0.386748	36.9623	1731	YWGR	TADO;HATU;YRTI
3-2016-01-06-10-30-01	2016-01-06	10:30:00	DeKUWC	-0.386748	36.9623	1731
3-2016-01-06-10-35-01	2016-01-06	10:35:00	DeKUWC	-0.386748	36.9623	1731
3-2016-01-06-10-40-01	2016-01-06	10:40:00	DeKUWC	-0.386748	36.9623	1731
3-2016-01-06-10-45-01	2016-01-06	10:45:00	DeKUWC	-0.386748	36.9623	1731
3-2016-01-06-10-50-01	2016-01-06	10:50:00	DeKUWC	-0.386748	36.9623	1731
3-2016-01-06-10-55-01	2016-01-06	10:55:00	DeKUWC	-0.386748	36.9623	1731
3-2016-01-06-11-00-01	2016-01-06	11:00:00	DeKUWC	-0.386748	36.9623	1731
3-2016-01-06-11-05-01	2016-01-06	11:05:00	DeKUWC	-0.386748	36.9623	1731
3-2016-01-06-11-10-01	2016-01-06	11:10:00	DeKUWC	-0.386748	36.9623	1731	YWGR	HATU	A Sunbird in the background
3-2016-01-06-11-15-01	2016-01-06	11:15:00	DeKUWC	-0.386748	36.9623	1731
3-2016-01-06-11-20-01	2016-01-06	11:20:00	DeKUWC	-0.386748	36.9623	1731
3-2016-01-06-11-25-01	2016-01-06	11:25:00	DeKUWC	-0.386748	36.9623	1731
3-2016-01-06-11-30-01	2016-01-06	11:30:00	DeKUWC	-0.386748	36.9623	1731
3-2016-01-06-11-35-01	2016-01-06	11:35:00	DeKUWC	-0.386748	36.9623	1731
3-2016-01-06-11-40-02	2016-01-06	11:40:00	DeKUWC	-0.386748	36.9623	1731
3-2016-01-06-11-45-02	2016-01-06	11:45:00	DeKUWC	-0.386748	36.9623	1731
3-2016-01-06-11-50-01	2016-01-06	11:50:00	DeKUWC	-0.386748	36.9623	1731
3-2016-01-06-11-55-01	2016-01-06	11:55:00	DeKUWC	-0.386748	36.9623	1731
3-2016-01-06-12-00-01	2016-01-06	12:00:00	DeKUWC	-0.386748	36.9623	1731
3-2016-01-06-12-05-01	2016-01-06	12:05:00	DeKUWC	-0.386748	36.9623	1731
3-2016-01-06-12-10-01	2016-01-06	12:10:00	DeKUWC	-0.386748	36.9623	1731
3-2016-01-06-12-15-01	2016-01-06	12:15:00	DeKUWC	-0.386748	36.9623	1731	YRTI;TRBO
3-2016-01-06-12-20-01	2016-01-06	12:20:00	DeKUWC	-0.386748	36.9623	1731
3-2016-01-06-12-25-01	2016-01-06	12:25:00	DeKUWC	-0.386748	36.9623	1731
3-2016-01-06-12-30-01	2016-01-06	12:30:00	DeKUWC	-0.386748	36.9623	1731
3-2016-01-06-12-35-01	2016-01-06	12:35:00	DeKUWC	-0.386748	36.9623	1731
3-2016-01-06-12-40-01	2016-01-06	12:40:00	DeKUWC	-0.386748	36.9623	1731
3-2016-01-06-12-45-01	2016-01-06	12:45:00	DeKUWC	-0.386748	36.9623	1731
3-2016-01-06-12-50-01	2016-01-06	12:50:00	DeKUWC	-0.386748	36.9623	1731
3-2016-01-06-12-55-01	2016-01-06	12:55:00	DeKUWC	-0.386748	36.9623	1731
3-2016-01-06-13-00-01	2016-01-06	13:00:00	DeKUWC	-0.386748	36.9623	1731	YWGR;TADO
3-2016-01-06-13-05-02	2016-01-06	13:05:00	DeKUWC	-0.386748	36.9623	1731
3-2016-01-06-13-10-01	2016-01-06	13:10:00	DeKUWC	-0.386748	36.9623	1731
3-2016-01-06-13-15-01	2016-01-06	13:15:00	DeKUWC	-0.386748	36.9623	1731
3-2016-01-06-13-20-01	2016-01-06	13:20:00	DeKUWC	-0.386748	36.9623	1731
3-2016-01-06-13-25-01	2016-01-06	13:25:00	DeKUWC	-0.386748	36.9623	1731
3-2016-01-06-13-30-01	2016-01-06	13:30:00	DeKUWC	-0.386748	36.9623	1731
3-2016-01-06-13-35-01	2016-01-06	13:35:00	DeKUWC	-0.386748	36.9623	1731
3-2016-01-06-13-40-01	2016-01-06	13:40:00	DeKUWC	-0.386748	36.9623	1731
3-2016-01-06-13-45-01	2016-01-06	13:45:00	DeKUWC	-0.386748	36.9623	1731
3-2016-01-06-13-50-01	2016-01-06	13:50:00	DeKUWC	-0.386748	36.9623	1731	YRTI;YWGR;GBCA
3-2016-01-06-13-55-01	2016-01-06	13:55:00	DeKUWC	-0.386748	36.9623	1731
3-2016-01-06-14-00-01	2016-01-06	14:00:00	DeKUWC	-0.386748	36.9623	1731	HATU;YWGR;TADO
3-2016-01-06-14-05-01	2016-01-06	14:05:00	DeKUWC	-0.386748	36.9623	1731
3-2016-01-06-14-10-01	2016-01-06	14:10:00	DeKUWC	-0.386748	36.9623	1731
3-2016-01-06-14-15-01	2016-01-06	14:15:00	DeKUWC	-0.386748	36.9623	1731
3-2016-01-06-14-20-02	2016-01-06	14:20:00	DeKUWC	-0.386748	36.9623	1731
3-2016-01-06-14-25-01	2016-01-06	14:25:00	DeKUWC	-0.386748	36.9623	1731
3-2016-01-06-14-30-01	2016-01-06	14:30:00	DeKUWC	-0.386748	36.9623	1731
3-2016-01-06-14-35-01	2016-01-06	14:35:00	DeKUWC	-0.386748	36.9623	1731
3-2016-01-06-14-40-01	2016-01-06	14:40:00	DeKUWC	-0.386748	36.9623	1731		GBCA;TRBO;YRTI
3-2016-01-06-14-45-01	2016-01-06	14:45:00	DeKUWC	-0.386748	36.9623	1731
3-2016-01-06-14-50-01	2016-01-06	14:50:00	DeKUWC	-0.386748	36.9623	1731
3-2016-01-06-14-55-01	2016-01-06	14:55:00	DeKUWC	-0.386748	36.9623	1731
3-2016-01-06-15-00-01	2016-01-06	15:00:00	DeKUWC	-0.386748	36.9623	1731		GBCA;HATU;TADO;TRBO
3-2016-01-06-15-05-01	2016-01-06	15:05:00	DeKUWC	-0.386748	36.9623	1731
3-2016-01-06-15-10-01	2016-01-06	15:10:00	DeKUWC	-0.386748	36.9623	1731
3-2016-01-06-15-15-01	2016-01-06	15:15:00	DeKUWC	-0.386748	36.9623	1731

## Sheet: 4
Filename	Date	Time	Location	Latitude	Longitude	Elevation	Foreground Species	Background Species	Remarks
4-2016-01-05-12-40-01	2016-01-05	12:40:00	DeKUWC	-0.386388	36.9641	1732
4-2016-01-05-12-45-01	2016-01-05	12:45:00	DeKUWC	-0.386388	36.9641	1732	TRBO	YWGR;GBCA	Insect noise
4-2016-01-05-12-50-01	2016-01-05	12:50:00	DeKUWC	-0.386388	36.9641	1732
4-2016-01-05-12-55-01	2016-01-05	12:55:00	DeKUWC	-0.386388	36.9641	1732
4-2016-01-05-13-00-01	2016-01-05	13:00:00	DeKUWC	-0.386388	36.9641	1732
4-2016-01-05-13-05-01	2016-01-05	13:05:00	DeKUWC	-0.386388	36.9641	1732
4-2016-01-05-13-10-01	2016-01-05	13:10:00	DeKUWC	-0.386388	36.9641	1732
4-2016-01-05-13-15-01	2016-01-05	13:15:00	DeKUWC	-0.386388	36.9641	1732
4-2016-01-05-13-20-01	2016-01-05	13:20:00	DeKUWC	-0.386388	36.9641	1732
4-2016-01-05-13-25-01	2016-01-05	13:25:00	DeKUWC	-0.386388	36.9641	1732
4-2016-01-05-13-30-01	2016-01-05	13:30:00	DeKUWC	-0.386388	36.9641	1732
4-2016-01-05-13-35-01	2016-01-05	13:35:00	DeKUWC	-0.386388	36.9641	1732
4-2016-01-05-13-40-01	2016-01-05	13:40:00	DeKUWC	-0.386388	36.9641	1732
4-2016-01-05-13-45-01	2016-01-05	13:45:00	DeKUWC	-0.386388	36.9641	1732
4-2016-01-05-13-50-01	2016-01-05	13:50:00	DeKUWC	-0.386388	36.9641	1732
4-2016-01-05-13-55-01	2016-01-05	13:55:00	DeKUWC	-0.386388	36.9641	1732	YWGR;HATU	GBCA	Engine noise;Cow bells
4-2016-01-05-14-00-01	2016-01-05	14:00:00	DeKUWC	-0.386388	36.9641	1732	YWGR;HATU		Cow bells; insect noise
4-2016-01-05-14-05-01	2016-01-05	14:05:00	DeKUWC	-0.386388	36.9641	1732
4-2016-01-05-14-10-01	2016-01-05	14:10:00	DeKUWC	-0.386388	36.9641	1732
4-2016-01-05-14-15-01	2016-01-05	14:15:00	DeKUWC	-0.386388	36.9641	1732
4-2016-01-05-14-20-01	2016-01-05	14:20:00	DeKUWC	-0.386388	36.9641	1732
4-2016-01-05-14-25-01	2016-01-05	14:25:00	DeKUWC	-0.386388	36.9641	1732
4-2016-01-05-14-30-02	2016-01-05	14:30:00	DeKUWC	-0.386388	36.9641	1732
4-2016-01-05-14-35-02	2016-01-05	14:35:00	DeKUWC	-0.386388	36.9641	1732
4-2016-01-05-14-40-01	2016-01-05	14:40:00	DeKUWC	-0.386388	36.9641	1732	YWGR	TADO
4-2016-01-05-14-45-01	2016-01-05	14:45:00	DeKUWC	-0.386388	36.9641	1732
4-2016-01-05-14-50-01	2016-01-05	14:50:00	DeKUWC	-0.386388	36.9641	1732	TADO;YWGR;HATU
4-2016-01-05-14-55-01	2016-01-05	14:55:00	DeKUWC	-0.386388	36.9641	1732
4-2016-01-05-15-00-01	2016-01-05	15:00:00	DeKUWC	-0.386388	36.9641	1732
4-2016-01-05-15-05-01	2016-01-05	15:05:00	DeKUWC	-0.386388	36.9641	1732
4-2016-01-05-15-10-01	2016-01-05	15:10:00	DeKUWC	-0.386388	36.9641	1732
4-2016-01-05-15-15-01	2016-01-05	15:15:00	DeKUWC	-0.386388	36.9641	1732
4-2016-01-05-15-20-01	2016-01-05	15:20:00	DeKUWC	-0.386388	36.9641	1732
4-2016-01-05-15-25-01	2016-01-05	15:25:00	DeKUWC	-0.386388	36.9641	1732
4-2016-01-05-15-30-01	2016-01-05	15:30:00	DeKUWC	-0.386388	36.9641	1732
4-2016-01-05-15-35-01	2016-01-05	15:35:00	DeKUWC	-0.386388	36.9641	1732
4-2016-01-05-15-40-01	2016-01-05	15:40:00	DeKUWC	-0.386388	36.9641	1732
4-2016-01-05-15-45-01	2016-01-05	15:45:00	DeKUWC	-0.386388	36.9641	1732
4-2016-01-05-15-50-01	2016-01-05	15:50:00	DeKUWC	-0.386388	36.9641	1732
4-2016-01-05-15-55-02	2016-01-05	15:55:00	DeKUWC	-0.386388	36.9641	1732
4-2016-01-05-16-00-02	2016-01-05	16:00:00	DeKUWC	-0.386388	36.9641	1732	YWGR;YRTI		Engine noise
4-2016-01-05-16-05-01	2016-01-05	16:05:00	DeKUWC	-0.386388	36.9641	1732
4-2016-01-05-16-10-01	2016-01-05	16:10:00	DeKUWC	-0.386388	36.9641	1732
4-2016-01-05-16-15-01	2016-01-05	16:15:00	DeKUWC	-0.386388	36.9641	1732
4-2016-01-05-16-20-01	2016-01-05	16:20:00	DeKUWC	-0.386388	36.9641	1732
4-2016-01-05-16-25-01	2016-01-05	16:25:00	DeKUWC	-0.386388	36.9641	1732
4-2016-01-05-16-30-01	2016-01-05	16:30:00	DeKUWC	-0.386388	36.9641	1732
4-2016-01-05-16-35-01	2016-01-05	16:35:00	DeKUWC	-0.386388	36.9641	1732
4-2016-01-05-16-40-01	2016-01-05	16:40:00	DeKUWC	-0.386388	36.9641	1732	BBPU	YWGR
4-2016-01-05-16-45-01	2016-01-05	16:45:00	DeKUWC	-0.386388	36.9641	1732
4-2016-01-05-16-50-01	2016-01-05	16:50:00	DeKUWC	-0.386388	36.9641	1732
4-2016-01-05-16-55-01	2016-01-05	16:55:00	DeKUWC	-0.386388	36.9641	1732
4-2016-01-05-17-00-01	2016-01-05	17:00:00	DeKUWC	-0.386388	36.9641	1732
4-2016-01-05-17-05-01	2016-01-05	17:05:00	DeKUWC	-0.386388	36.9641	1732
4-2016-01-05-17-10-01	2016-01-05	17:10:00	DeKUWC	-0.386388	36.9641	1732
4-2016-01-05-17-15-01	2016-01-05	17:15:00	DeKUWC	-0.386388	36.9641	1732
4-2016-01-05-17-20-01	2016-01-05	17:20:00	DeKUWC	-0.386388	36.9641	1732
4-2016-01-05-17-25-01	2016-01-05	17:25:00	DeKUWC	-0.386388	36.9641	1732
4-2016-01-05-17-30-01	2016-01-05	17:30:00	DeKUWC	-0.386388	36.9641	1732
4-2016-01-05-17-35-01	2016-01-05	17:35:00	DeKUWC	-0.386388	36.9641	1732
4-2016-01-05-17-40-01	2016-01-05	17:40:00	DeKUWC	-0.386388	36.9641	1732
4-2016-01-05-17-45-01	2016-01-05	17:45:00	DeKUWC	-0.386388	36.9641	1732
4-2016-01-05-17-50-01	2016-01-05	17:50:00	DeKUWC	-0.386388	36.9641	1732
4-2016-01-05-17-55-01	2016-01-05	17:55:00	DeKUWC	-0.386388	36.9641	1732
4-2016-01-05-18-00-01	2016-01-05	18:00:00	DeKUWC	-0.386388	36.9641	1732	BBPU;HATU	YRTI;YWGR;TADO
4-2016-01-05-18-05-01	2016-01-05	18:05:00	DeKUWC	-0.386388	36.9641	1732	HATU;COBU
4-2016-01-05-18-10-01	2016-01-05	18:10:00	DeKUWC	-0.386388	36.9641	1732
4-2016-01-05-18-15-01	2016-01-05	18:15:00	DeKUWC	-0.386388	36.9641	1732
4-2016-01-05-18-20-01	2016-01-05	18:20:00	DeKUWC	-0.386388	36.9641	1732
4-2016-01-05-18-25-01	2016-01-05	18:25:00	DeKUWC	-0.386388	36.9641	1732
4-2016-01-05-18-30-01	2016-01-05	18:30:00	DeKUWC	-0.386388	36.9641	1732
4-2016-01-05-18-35-02	2016-01-05	18:35:00	DeKUWC	-0.386388	36.9641	1732
4-2016-01-05-18-40-01	2016-01-05	18:40:00	DeKUWC	-0.386388	36.9641	1732
4-2016-01-05-18-45-01	2016-01-05	18:45:00	DeKUWC	-0.386388	36.9641	1732
4-2016-01-05-18-50-01	2016-01-05	18:50:00	DeKUWC	-0.386388	36.9641	1732
4-2016-01-05-18-55-01	2016-01-05	18:55:00	DeKUWC	-0.386388	36.9641	1732
4-2016-01-05-19-00-01	2016-01-05	19:00:00	DeKUWC	-0.386388	36.9641	1732
4-2016-01-05-19-05-01	2016-01-05	19:05:00	DeKUWC	-0.386388	36.9641	1732
4-2016-01-05-19-10-01	2016-01-05	19:10:00	DeKUWC	-0.386388	36.9641	1732
4-2016-01-05-19-15-01	2016-01-05	19:15:00	DeKUWC	-0.386388	36.9641	1732
4-2016-01-05-19-20-01	2016-01-05	19:20:00	DeKUWC	-0.386388	36.9641	1732
4-2016-01-05-19-25-01	2016-01-05	19:25:00	DeKUWC	-0.386388	36.9641	1732
4-2016-01-05-19-30-01	2016-01-05	19:30:00	DeKUWC	-0.386388	36.9641	1732
4-2016-01-05-19-35-01	2016-01-05	19:35:00	DeKUWC	-0.386388	36.9641	1732
4-2016-01-05-19-40-01	2016-01-05	19:40:00	DeKUWC	-0.386388	36.9641	1732
4-2016-01-05-19-45-01	2016-01-05	19:45:00	DeKUWC	-0.386388	36.9641	1732
4-2016-01-05-19-50-01	2016-01-05	19:50:00	DeKUWC	-0.386388	36.9641	1732
4-2016-01-05-19-55-01	2016-01-05	19:55:00	DeKUWC	-0.386388	36.9641	1732
4-2016-01-05-20-00-02	2016-01-05	20:00:00	DeKUWC	-0.386388	36.9641	1732
4-2016-01-05-20-05-01	2016-01-05	20:05:00	DeKUWC	-0.386388	36.9641	1732
4-2016-01-05-20-10-01	2016-01-05	20:10:00	DeKUWC	-0.386388	36.9641	1732
4-2016-01-05-20-15-01	2016-01-05	20:15:00	DeKUWC	-0.386388	36.9641	1732
4-2016-01-05-20-20-01	2016-01-05	20:20:00	DeKUWC	-0.386388	36.9641	1732
4-2016-01-05-20-25-01	2016-01-05	20:25:00	DeKUWC	-0.386388	36.9641	1732
4-2016-01-05-20-30-01	2016-01-05	20:30:00	DeKUWC	-0.386388	36.9641	1732
4-2016-01-05-20-35-01	2016-01-05	20:35:00	DeKUWC	-0.386388	36.9641	1732
4-2016-01-05-20-40-01	2016-01-05	20:40:00	DeKUWC	-0.386388	36.9641	1732
4-2016-01-05-20-45-01	2016-01-05	20:45:00	DeKUWC	-0.386388	36.9641	1732
4-2016-01-05-20-50-01	2016-01-05	20:50:00	DeKUWC	-0.386388	36.9641	1732
4-2016-01-05-20-55-02	2016-01-05	20:55:00	DeKUWC	-0.386388	36.9641	1732
4-2016-01-05-21-00-01	2016-01-05	21:00:00	DeKUWC	-0.386388	36.9641	1732
4-2016-01-05-21-05-01	2016-01-05	21:05:00	DeKUWC	-0.386388	36.9641	1732
4-2016-01-05-21-10-01	2016-01-05	21:10:00	DeKUWC	-0.386388	36.9641	1732
4-2016-01-05-21-15-01	2016-01-05	21:15:00	DeKUWC	-0.386388	36.9641	1732
4-2016-01-05-21-20-01	2016-01-05	21:20:00	DeKUWC	-0.386388	36.9641	1732
4-2016-01-05-21-25-01	2016-01-05	21:25:00	DeKUWC	-0.386388	36.9641	1732
4-2016-01-05-21-30-01	2016-01-05	21:30:00	DeKUWC	-0.386388	36.9641	1732
4-2016-01-05-21-35-01	2016-01-05	21:35:00	DeKUWC	-0.386388	36.9641	1732
4-2016-01-05-21-40-01	2016-01-05	21:40:00	DeKUWC	-0.386388	36.9641	1732
4-2016-01-05-21-45-01	2016-01-05	21:45:00	DeKUWC	-0.386388	36.9641	1732
4-2016-01-05-21-50-02	2016-01-05	21:50:00	DeKUWC	-0.386388	36.9641	1732
4-2016-01-05-21-55-01	2016-01-05	21:55:00	DeKUWC	-0.386388	36.9641	1732
4-2016-01-05-22-00-01	2016-01-05	22:00:00	DeKUWC	-0.386388	36.9641	1732
4-2016-01-05-22-05-01	2016-01-05	22:05:00	DeKUWC	-0.386388	36.9641	1732
4-2016-01-05-22-10-01	2016-01-05	22:10:00	DeKUWC	-0.386388	36.9641	1732
4-2016-01-05-22-15-01	2016-01-05	22:15:00	DeKUWC	-0.386388	36.9641	1732
4-2016-01-05-22-20-01	2016-01-05	22:20:00	DeKUWC	-0.386388	36.9641	1732
4-2016-01-05-22-25-01	2016-01-05	22:25:00	DeKUWC	-0.386388	36.9641	1732
4-2016-01-05-22-30-01	2016-01-05	22:30:00	DeKUWC	-0.386388	36.9641	1732
4-2016-01-05-22-35-01	2016-01-05	22:35:00	DeKUWC	-0.386388	36.9641	1732
4-2016-01-05-22-40-01	2016-01-05	22:40:00	DeKUWC	-0.386388	36.9641	1732
4-2016-01-05-22-45-02	2016-01-05	22:45:00	DeKUWC	-0.386388	36.9641	1732
4-2016-01-05-22-50-02	2016-01-05	22:50:00	DeKUWC	-0.386388	36.9641	1732
4-2016-01-05-22-55-01	2016-01-05	22:55:00	DeKUWC	-0.386388	36.9641	1732
4-2016-01-05-23-00-01	2016-01-05	23:00:00	DeKUWC	-0.386388	36.9641	1732
4-2016-01-05-23-05-01	2016-01-05	23:05:00	DeKUWC	-0.386388	36.9641	1732
4-2016-01-05-23-10-01	2016-01-05	23:10:00	DeKUWC	-0.386388	36.9641	1732
4-2016-01-05-23-15-01	2016-01-05	23:15:00	DeKUWC	-0.386388	36.9641	1732
4-2016-01-05-23-20-01	2016-01-05	23:20:00	DeKUWC	-0.386388	36.9641	1732
4-2016-01-05-23-25-01	2016-01-05	23:25:00	DeKUWC	-0.386388	36.9641	1732
4-2016-01-05-23-30-01	2016-01-05	23:30:00	DeKUWC	-0.386388	36.9641	1732
4-2016-01-05-23-35-01	2016-01-05	23:35:00	DeKUWC	-0.386388	36.9641	1732
4-2016-01-05-23-40-01	2016-01-05	23:40:00	DeKUWC	-0.386388	36.9641	1732
4-2016-01-05-23-45-02	2016-01-05	23:45:00	DeKUWC	-0.386388	36.9641	1732
4-2016-01-05-23-50-01	2016-01-05	23:50:00	DeKUWC	-0.386388	36.9641	1732
4-2016-01-05-23-55-01	2016-01-05	23:55:00	DeKUWC	-0.386388	36.9641	1732
4-2016-01-06-00-00-01	2016-01-06	00:00:00	DeKUWC	-0.386388	36.9641	1732
4-2016-01-06-00-05-01	2016-01-06	00:05:00	DeKUWC	-0.386388	36.9641	1732
4-2016-01-06-00-10-01	2016-01-06	00:10:00	DeKUWC	-0.386388	36.9641	1732
4-2016-01-06-00-15-01	2016-01-06	00:15:00	DeKUWC	-0.386388	36.9641	1732
4-2016-01-06-00-20-01	2016-01-06	00:20:00	DeKUWC	-0.386388	36.9641	1732
4-2016-01-06-00-25-01	2016-01-06	00:25:00	DeKUWC	-0.386388	36.9641	1732
4-2016-01-06-00-30-01	2016-01-06	00:30:00	DeKUWC	-0.386388	36.9641	1732
4-2016-01-06-00-35-01	2016-01-06	00:35:00	DeKUWC	-0.386388	36.9641	1732
4-2016-01-06-00-40-02	2016-01-06	00:40:00	DeKUWC	-0.386388	36.9641	1732			Tree Hyrax in the foreground
4-2016-01-06-00-45-01	2016-01-06	00:45:00	DeKUWC	-0.386388	36.9641	1732			Tree Hyrax in the foreground
4-2016-01-06-00-50-01	2016-01-06	00:50:00	DeKUWC	-0.386388	36.9641	1732
4-2016-01-06-00-55-01	2016-01-06	00:55:00	DeKUWC	-0.386388	36.9641	1732
4-2016-01-06-01-00-01	2016-01-06	01:00:00	DeKUWC	-0.386388	36.9641	1732
4-2016-01-06-01-05-01	2016-01-06	01:05:00	DeKUWC	-0.386388	36.9641	1732
4-2016-01-06-01-10-01	2016-01-06	01:10:00	DeKUWC	-0.386388	36.9641	1732
4-2016-01-06-01-15-01	2016-01-06	01:15:00	DeKUWC	-0.386388	36.9641	1732
4-2016-01-06-01-20-01	2016-01-06	01:20:00	DeKUWC	-0.386388	36.9641	1732
4-2016-01-06-01-25-01	2016-01-06	01:25:00	DeKUWC	-0.386388	36.9641	1732
4-2016-01-06-01-30-01	2016-01-06	01:30:00	DeKUWC	-0.386388	36.9641	1732
4-2016-01-06-01-35-02	2016-01-06	01:35:00	DeKUWC	-0.386388	36.9641	1732
4-2016-01-06-01-40-01	2016-01-06	01:40:00	DeKUWC	-0.386388	36.9641	1732
4-2016-01-06-01-45-01	2016-01-06	01:45:00	DeKUWC	-0.386388	36.9641	1732
4-2016-01-06-01-50-01	2016-01-06	01:50:00	DeKUWC	-0.386388	36.9641	1732
4-2016-01-06-01-55-01	2016-01-06	01:55:00	DeKUWC	-0.386388	36.9641	1732
4-2016-01-06-02-00-01	2016-01-06	02:00:00	DeKUWC	-0.386388	36.9641	1732
4-2016-01-06-02-05-01	2016-01-06	02:05:00	DeKUWC	-0.386388	36.9641	1732
4-2016-01-06-02-10-01	2016-01-06	02:10:00	DeKUWC	-0.386388	36.9641	1732
4-2016-01-06-02-15-01	2016-01-06	02:15:00	DeKUWC	-0.386388	36.9641	1732
4-2016-01-06-02-20-01	2016-01-06	02:20:00	DeKUWC	-0.386388	36.9641	1732
4-2016-01-06-02-25-01	2016-01-06	02:25:00	DeKUWC	-0.386388	36.9641	1732
4-2016-01-06-02-30-02	2016-01-06	02:30:00	DeKUWC	-0.386388	36.9641	1732
4-2016-01-06-02-35-01	2016-01-06	02:35:00	DeKUWC	-0.386388	36.9641	1732
4-2016-01-06-02-40-01	2016-01-06	02:40:00	DeKUWC	-0.386388	36.9641	1732
4-2016-01-06-02-45-01	2016-01-06	02:45:00	DeKUWC	-0.386388	36.9641	1732
4-2016-01-06-02-50-01	2016-01-06	02:50:00	DeKUWC	-0.386388	36.9641	1732
4-2016-01-06-02-55-01	2016-01-06	02:55:00	DeKUWC	-0.386388	36.9641	1732
4-2016-01-06-03-00-01	2016-01-06	03:00:00	DeKUWC	-0.386388	36.9641	1732
4-2016-01-06-03-05-01	2016-01-06	03:05:00	DeKUWC	-0.386388	36.9641	1732
4-2016-01-06-03-10-01	2016-01-06	03:10:00	DeKUWC	-0.386388	36.9641	1732
4-2016-01-06-03-15-01	2016-01-06	03:15:00	DeKUWC	-0.386388	36.9641	1732
4-2016-01-06-03-20-01	2016-01-06	03:20:00	DeKUWC	-0.386388	36.9641	1732
4-2016-01-06-03-25-02	2016-01-06	03:25:00	DeKUWC	-0.386388	36.9641	1732
4-2016-01-06-03-30-02	2016-01-06	03:30:00	DeKUWC	-0.386388	36.9641	1732
4-2016-01-06-03-35-01	2016-01-06	03:35:00	DeKUWC	-0.386388	36.9641	1732
4-2016-01-06-03-40-01	2016-01-06	03:40:00	DeKUWC	-0.386388	36.9641	1732
4-2016-01-06-03-45-01	2016-01-06	03:45:00	DeKUWC	-0.386388	36.9641	1732
4-2016-01-06-03-50-01	2016-01-06	03:50:00	DeKUWC	-0.386388	36.9641	1732
4-2016-01-06-03-55-01	2016-01-06	03:55:00	DeKUWC	-0.386388	36.9641	1732
4-2016-01-06-04-00-01	2016-01-06	04:00:00	DeKUWC	-0.386388	36.9641	1732
4-2016-01-06-04-05-01	2016-01-06	04:05:00	DeKUWC	-0.386388	36.9641	1732
4-2016-01-06-04-10-01	2016-01-06	04:10:00	DeKUWC	-0.386388	36.9641	1732
4-2016-01-06-04-15-01	2016-01-06	04:15:00	DeKUWC	-0.386388	36.9641	1732
4-2016-01-06-04-20-01	2016-01-06	04:20:00	DeKUWC	-0.386388	36.9641	1732
4-2016-01-06-04-25-02	2016-01-06	04:25:00	DeKUWC	-0.386388	36.9641	1732
4-2016-01-06-04-30-01	2016-01-06	04:30:00	DeKUWC	-0.386388	36.9641	1732
4-2016-01-06-04-35-01	2016-01-06	04:35:00	DeKUWC	-0.386388	36.9641	1732
4-2016-01-06-04-40-01	2016-01-06	04:40:00	DeKUWC	-0.386388	36.9641	1732
4-2016-01-06-04-45-01	2016-01-06	04:45:00	DeKUWC	-0.386388	36.9641	1732
4-2016-01-06-04-50-01	2016-01-06	04:50:00	DeKUWC	-0.386388	36.9641	1732
4-2016-01-06-04-55-01	2016-01-06	04:55:00	DeKUWC	-0.386388	36.9641	1732
4-2016-01-06-05-00-01	2016-01-06	05:00:00	DeKUWC	-0.386388	36.9641	1732
4-2016-01-06-05-05-01	2016-01-06	05:05:00	DeKUWC	-0.386388	36.9641	1732
4-2016-01-06-05-10-01	2016-01-06	05:10:00	DeKUWC	-0.386388	36.9641	1732
4-2016-01-06-05-15-01	2016-01-06	05:15:00	DeKUWC	-0.386388	36.9641	1732
4-2016-01-06-05-20-02	2016-01-06	05:20:00	DeKUWC	-0.386388	36.9641	1732
4-2016-01-06-05-25-01	2016-01-06	05:25:00	DeKUWC	-0.386388	36.9641	1732
4-2016-01-06-05-30-01	2016-01-06	05:30:00	DeKUWC	-0.386388	36.9641	1732
4-2016-01-06-05-35-01	2016-01-06	05:35:00	DeKUWC	-0.386388	36.9641	1732
4-2016-01-06-05-40-01	2016-01-06	05:40:00	DeKUWC	-0.386388	36.9641	1732
4-2016-01-06-05-45-01	2016-01-06	05:45:00	DeKUWC	-0.386388	36.9641	1732
4-2016-01-06-05-50-01	2016-01-06	05:50:00	DeKUWC	-0.386388	36.9641	1732
4-2016-01-06-05-55-01	2016-01-06	05:55:00	DeKUWC	-0.386388	36.9641	1732
4-2016-01-06-06-00-01	2016-01-06	06:00:00	DeKUWC	-0.386388	36.9641	1732
4-2016-01-06-06-05-01	2016-01-06	06:05:00	DeKUWC	-0.386388	36.9641	1732
4-2016-01-06-06-10-01	2016-01-06	06:10:00	DeKUWC	-0.386388	36.9641	1732
4-2016-01-06-06-15-01	2016-01-06	06:15:00	DeKUWC	-0.386388	36.9641	1732
4-2016-01-06-06-20-01	2016-01-06	06:20:00	DeKUWC	-0.386388	36.9641	1732
4-2016-01-06-06-25-01	2016-01-06	06:25:00	DeKUWC	-0.386388	36.9641	1732
4-2016-01-06-06-30-01	2016-01-06	06:30:00	DeKUWC	-0.386388	36.9641	1732
4-2016-01-06-06-35-01	2016-01-06	06:35:00	DeKUWC	-0.386388	36.9641	1732
4-2016-01-06-06-40-01	2016-01-06	06:40:00	DeKUWC	-0.386388	36.9641	1732
4-2016-01-06-06-45-01	2016-01-06	06:45:00	DeKUWC	-0.386388	36.9641	1732
4-2016-01-06-06-50-01	2016-01-06	06:50:00	DeKUWC	-0.386388	36.9641	1732
4-2016-01-06-06-55-01	2016-01-06	06:55:00	DeKUWC	-0.386388	36.9641	1732
4-2016-01-06-07-00-01	2016-01-06	07:00:00	DeKUWC	-0.386388	36.9641	1732
4-2016-01-06-07-05-01	2016-01-06	07:05:00	DeKUWC	-0.386388	36.9641	1732
4-2016-01-06-07-10-01	2016-01-06	07:10:00	DeKUWC	-0.386388	36.9641	1732
4-2016-01-06-07-15-01	2016-01-06	07:15:00	DeKUWC	-0.386388	36.9641	1732
4-2016-01-06-07-20-01	2016-01-06	07:20:00	DeKUWC	-0.386388	36.9641	1732	OLSU;TADO;HATU;YRTI	YWGR
4-2016-01-06-07-25-01	2016-01-06	07:25:00	DeKUWC	-0.386388	36.9641	1732	TADO;HATU;YWGR
4-2016-01-06-07-30-02	2016-01-06	07:30:00	DeKUWC	-0.386388	36.9641	1732
4-2016-01-06-07-35-01	2016-01-06	07:35:00	DeKUWC	-0.386388	36.9641	1732
4-2016-01-06-07-40-01	2016-01-06	07:40:00	DeKUWC	-0.386388	36.9641	1732
4-2016-01-06-07-45-01	2016-01-06	07:45:00	DeKUWC	-0.386388	36.9641	1732
4-2016-01-06-07-50-01	2016-01-06	07:50:00	DeKUWC	-0.386388	36.9641	1732
4-2016-01-06-07-55-01	2016-01-06	07:55:00	DeKUWC	-0.386388	36.9641	1732
4-2016-01-06-08-00-01	2016-01-06	08:00:00	DeKUWC	-0.386388	36.9641	1732
4-2016-01-06-08-05-01	2016-01-06	08:05:00	DeKUWC	-0.386388	36.9641	1732
4-2016-01-06-08-10-01	2016-01-06	08:10:00	DeKUWC	-0.386388	36.9641	1732
4-2016-01-06-08-15-01	2016-01-06	08:15:00	DeKUWC	-0.386388	36.9641	1732
4-2016-01-06-08-20-01	2016-01-06	08:20:00	DeKUWC	-0.386388	36.9641	1732
4-2016-01-06-08-25-01	2016-01-06	08:25:00	DeKUWC	-0.386388	36.9641	1732
4-2016-01-06-08-30-01	2016-01-06	08:30:00	DeKUWC	-0.386388	36.9641	1732
4-2016-01-06-08-35-01	2016-01-06	08:35:00	DeKUWC	-0.386388	36.9641	1732	TADO;YRTI;HATU	YWGR;GBCA;TRBO
4-2016-01-06-08-40-01	2016-01-06	08:40:00	DeKUWC	-0.386388	36.9641	1732	YRTI;HATU;TADO	YWGR	Possible sunbird in the foreground
4-2016-01-06-08-45-01	2016-01-06	08:45:00	DeKUWC	-0.386388	36.9641	1732
4-2016-01-06-08-50-01	2016-01-06	08:50:00	DeKUWC	-0.386388	36.9641	1732
4-2016-01-06-08-55-02	2016-01-06	08:55:00	DeKUWC	-0.386388	36.9641	1732	YWGR;TADO	YRTI
4-2016-01-06-09-00-01	2016-01-06	09:00:00	DeKUWC	-0.386388	36.9641	1732	TADO	YWGR;YRTI;TRBO
4-2016-01-06-09-05-01	2016-01-06	09:05:00	DeKUWC	-0.386388	36.9641	1732	YWGR;HATU;TADO
4-2016-01-06-09-10-01	2016-01-06	09:10:00	DeKUWC	-0.386388	36.9641	1732	YWGR;YRTI	HATU;TADO
4-2016-01-06-09-15-01	2016-01-06	09:15:00	DeKUWC	-0.386388	36.9641	1732
4-2016-01-06-09-20-01	2016-01-06	09:20:00	DeKUWC	-0.386388	36.9641	1732
4-2016-01-06-09-25-01	2016-01-06	09:25:00	DeKUWC	-0.386388	36.9641	1732
4-2016-01-06-09-30-01	2016-01-06	09:30:00	DeKUWC	-0.386388	36.9641	1732
4-2016-01-06-09-35-01	2016-01-06	09:35:00	DeKUWC	-0.386388	36.9641	1732
4-2016-01-06-09-40-01	2016-01-06	09:40:00	DeKUWC	-0.386388	36.9641	1732	YWGR;HATU	TADO;TRBO;GBCA
4-2016-01-06-09-45-01	2016-01-06	09:45:00	DeKUWC	-0.386388	36.9641	1732
4-2016-01-06-09-50-01	2016-01-06	09:50:00	DeKUWC	-0.386388	36.9641	1732
4-2016-01-06-09-55-01	2016-01-06	09:55:00	DeKUWC	-0.386388	36.9641	1732
4-2016-01-06-10-00-01	2016-01-06	10:00:00	DeKUWC	-0.386388	36.9641	1732
4-2016-01-06-10-05-01	2016-01-06	10:05:00	DeKUWC	-0.386388	36.9641	1732
4-2016-01-06-10-10-01	2016-01-06	10:10:00	DeKUWC	-0.386388	36.9641	1732	APFL;YWGR;TADO;GBCA;BTWE
4-2016-01-06-10-15-01	2016-01-06	10:15:00	DeKUWC	-0.386388	36.9641	1732	YWGR;HATU	APFL;TRBO
4-2016-01-06-10-20-01	2016-01-06	10:20:00	DeKUWC	-0.386388	36.9641	1732
4-2016-01-06-10-25-01	2016-01-06	10:25:00	DeKUWC	-0.386388	36.9641	1732
4-2016-01-06-10-30-01	2016-01-06	10:30:00	DeKUWC	-0.386388	36.9641	1732
4-2016-01-06-10-35-01	2016-01-06	10:35:00	DeKUWC	-0.386388	36.9641	1732
4-2016-01-06-10-40-01	2016-01-06	10:40:00	DeKUWC	-0.386388	36.9641	1732	YWGR;YRTI	HATU;TADO
4-2016-01-06-10-45-01	2016-01-06	10:45:00	DeKUWC	-0.386388	36.9641	1732
4-2016-01-06-10-50-01	2016-01-06	10:50:00	DeKUWC	-0.386388	36.9641	1732
4-2016-01-06-10-55-01	2016-01-06	10:55:00	DeKUWC	-0.386388	36.9641	1732
4-2016-01-06-11-00-01	2016-01-06	11:00:00	DeKUWC	-0.386388	36.9641	1732	YWGR;HATU	GBCA;TRBO
4-2016-01-06-11-05-01	2016-01-06	11:05:00	DeKUWC	-0.386388	36.9641	1732	HATU	TRBO;CHBA;GBCA	Cow bells
4-2016-01-06-11-10-01	2016-01-06	11:10:00	DeKUWC	-0.386388	36.9641	1732
4-2016-01-06-11-15-01	2016-01-06	11:15:00	DeKUWC	-0.386388	36.9641	1732	HATU	TRBO;YWGR	Cow bells
4-2016-01-06-11-20-01	2016-01-06	11:20:00	DeKUWC	-0.386388	36.9641	1732	HATU	TRBO;YWGR	Cow bells; engine noise
4-2016-01-06-11-25-01	2016-01-06	11:25:00	DeKUWC	-0.386388	36.9641	1732		HATU;YWGR	Aeroplane noise
4-2016-01-06-11-30-02	2016-01-06	11:30:00	DeKUWC	-0.386388	36.9641	1732
4-2016-01-06-11-35-02	2016-01-06	11:35:00	DeKUWC	-0.386388	36.9641	1732
4-2016-01-06-11-40-01	2016-01-06	11:40:00	DeKUWC	-0.386388	36.9641	1732
4-2016-01-06-11-45-01	2016-01-06	11:45:00	DeKUWC	-0.386388	36.9641	1732	HATU	YWGR;TRBO;YRTI
4-2016-01-06-11-50-01	2016-01-06	11:50:00	DeKUWC	-0.386388	36.9641	1732
4-2016-01-06-11-55-01	2016-01-06	11:55:00	DeKUWC	-0.386388	36.9641	1732
4-2016-01-06-12-00-01	2016-01-06	12:00:00	DeKUWC	-0.386388	36.9641	1732
4-2016-01-06-12-05-01	2016-01-06	12:05:00	DeKUWC	-0.386388	36.9641	1732
4-2016-01-06-12-10-01	2016-01-06	12:10:00	DeKUWC	-0.386388	36.9641	1732
4-2016-01-06-12-15-01	2016-01-06	12:15:00	DeKUWC	-0.386388	36.9641	1732
4-2016-01-06-12-20-01	2016-01-06	12:20:00	DeKUWC	-0.386388	36.9641	1732
4-2016-01-06-12-25-01	2016-01-06	12:25:00	DeKUWC	-0.386388	36.9641	1732
4-2016-01-06-12-30-01	2016-01-06	12:30:00	DeKUWC	-0.386388	36.9641	1732
4-2016-01-06-12-35-01	2016-01-06	12:35:00	DeKUWC	-0.386388	36.9641	1732
4-2016-01-06-12-40-01	2016-01-06	12:40:00	DeKUWC	-0.386388	36.9641	1732
4-2016-01-06-12-45-01	2016-01-06	12:45:00	DeKUWC	-0.386388	36.9641	1732
4-2016-01-06-12-50-01	2016-01-06	12:50:00	DeKUWC	-0.386388	36.9641	1732	YWGR;YRTI		Possible sunbird
4-2016-01-06-12-55-02	2016-01-06	12:55:00	DeKUWC	-0.386388	36.9641	1732
4-2016-01-06-13-00-02	2016-01-06	13:00:00	DeKUWC	-0.386388	36.9641	1732
4-2016-01-06-13-05-01	2016-01-06	13:05:00	DeKUWC	-0.386388	36.9641	1732
4-2016-01-06-13-10-01	2016-01-06	13:10:00	DeKUWC	-0.386388	36.9641	1732
4-2016-01-06-13-15-01	2016-01-06	13:15:00	DeKUWC	-0.386388	36.9641	1732
4-2016-01-06-13-20-01	2016-01-06	13:20:00	DeKUWC	-0.386388	36.9641	1732
4-2016-01-06-13-25-01	2016-01-06	13:25:00	DeKUWC	-0.386388	36.9641	1732
4-2016-01-06-13-30-01	2016-01-06	13:30:00	DeKUWC	-0.386388	36.9641	1732
4-2016-01-06-13-35-01	2016-01-06	13:35:00	DeKUWC	-0.386388	36.9641	1732	YWGR	TRBO
4-2016-01-06-13-40-01	2016-01-06	13:40:00	DeKUWC	-0.386388	36.9641	1732
4-2016-01-06-13-45-01	2016-01-06	13:45:00	DeKUWC	-0.386388	36.9641	1732
4-2016-01-06-13-50-01	2016-01-06	13:50:00	DeKUWC	-0.386388	36.9641	1732
4-2016-01-06-13-55-01	2016-01-06	13:55:00	DeKUWC	-0.386388	36.9641	1732
4-2016-01-06-14-00-01	2016-01-06	14:00:00	DeKUWC	-0.386388	36.9641	1732
4-2016-01-06-14-05-01	2016-01-06	14:05:00	DeKUWC	-0.386388	36.9641	1732
4-2016-01-06-14-10-01	2016-01-06	14:10:00	DeKUWC	-0.386388	36.9641	1732
4-2016-01-06-14-15-01	2016-01-06	14:15:00	DeKUWC	-0.386388	36.9641	1732
4-2016-01-06-14-20-01	2016-01-06	14:20:00	DeKUWC	-0.386388	36.9641	1732	YWGR;YRTI;HATU;COSU
4-2016-01-06-14-25-01	2016-01-06	14:25:00	DeKUWC	-0.386388	36.9641	1732
4-2016-01-06-14-30-01	2016-01-06	14:30:00	DeKUWC	-0.386388	36.9641	1732
4-2016-01-06-14-35-01	2016-01-06	14:35:00	DeKUWC	-0.386388	36.9641	1732	YRTI;HATU	APFL
4-2016-01-06-14-40-01	2016-01-06	14:40:00	DeKUWC	-0.386388	36.9641	1732
4-2016-01-06-14-45-01	2016-01-06	14:45:00	DeKUWC	-0.386388	36.9641	1732
4-2016-01-06-14-50-01	2016-01-06	14:50:00	DeKUWC	-0.386388	36.9641	1732
4-2016-01-06-14-55-01	2016-01-06	14:55:00	DeKUWC	-0.386388	36.9641	1732
4-2016-01-06-15-00-01	2016-01-06	15:00:00	DeKUWC	-0.386388	36.9641	1732
4-2016-01-06-15-05-01	2016-01-06	15:05:00	DeKUWC	-0.386388	36.9641	1732
4-2016-01-06-15-10-01	2016-01-06	15:10:00	DeKUWC	-0.386388	36.9641	1732
4-2016-01-06-15-15-01	2016-01-06	15:15:00	DeKUWC	-0.386388	36.9641	1732
4-2016-01-06-15-20-01	2016-01-06	15:20:00	DeKUWC	-0.386388	36.9641	1732
4-2016-01-06-15-25-01	2016-01-06	15:25:00	DeKUWC	-0.386388	36.9641	1732
4-2016-01-06-15-30-01	2016-01-06	15:30:00	DeKUWC	-0.386388	36.9641	1732
4-2016-01-06-15-35-02	2016-01-06	15:35:00	DeKUWC	-0.386388	36.9641	1732	YRTI;YWGR;TRBO
4-2016-01-06-15-40-01	2016-01-06	15:40:00	DeKUWC	-0.386388	36.9641	1732
4-2016-01-06-15-45-01	2016-01-06	15:45:00	DeKUWC	-0.386388	36.9641	1732
4-2016-01-06-15-50-01	2016-01-06	15:50:00	DeKUWC	-0.386388	36.9641	1732
4-2016-01-06-15-55-01	2016-01-06	15:55:00	DeKUWC	-0.386388	36.9641	1732
4-2016-01-06-16-00-01	2016-01-06	16:00:00	DeKUWC	-0.386388	36.9641	1732
4-2016-01-06-16-05-01	2016-01-06	16:05:00	DeKUWC	-0.386388	36.9641	1732
4-2016-01-06-16-10-01	2016-01-06	16:10:00	DeKUWC	-0.386388	36.9641	1732	HATU	TADO;YWGR

## Sheet: 5
Filename	Date	Time	Location	Latitude	Longitude	Elevation	Foreground Species	Background Species	Remarks
5-2016-01-28-08-25-01	2016-01-28	08:25:00	DeKUWC	-0.388048	36.9588	1769	GBCA	HATU;YRTI
5-2016-01-28-08-30-01	2016-01-28	08:30:00	DeKUWC	-0.388048	36.9588	1769
5-2016-01-28-08-35-01	2016-01-28	08:35:00	DeKUWC	-0.388048	36.9588	1769
5-2016-01-28-08-40-01	2016-01-28	08:40:00	DeKUWC	-0.388048	36.9588	1769
5-2016-01-28-08-45-01	2016-01-28	08:45:00	DeKUWC	-0.388048	36.9588	1769
5-2016-01-28-08-50-01	2016-01-28	08:50:00	DeKUWC	-0.388048	36.9588	1769
5-2016-01-28-08-55-01	2016-01-28	08:55:00	DeKUWC	-0.388048	36.9588	1769
5-2016-01-28-09-00-01	2016-01-28	09:00:00	DeKUWC	-0.388048	36.9588	1769
5-2016-01-28-09-05-01	2016-01-28	09:05:00	DeKUWC	-0.388048	36.9588	1769
5-2016-01-28-09-10-01	2016-01-28	09:10:00	DeKUWC	-0.388048	36.9588	1769
5-2016-01-28-09-15-02	2016-01-28	09:15:00	DeKUWC	-0.388048	36.9588	1769
5-2016-01-28-09-20-01	2016-01-28	09:20:00	DeKUWC	-0.388048	36.9588	1769
5-2016-01-28-09-25-01	2016-01-28	09:25:00	DeKUWC	-0.388048	36.9588	1769
5-2016-01-28-09-30-01	2016-01-28	09:30:00	DeKUWC	-0.388048	36.9588	1769
5-2016-01-28-09-35-01	2016-01-28	09:35:00	DeKUWC	-0.388048	36.9588	1769
5-2016-01-28-09-40-01	2016-01-28	09:40:00	DeKUWC	-0.388048	36.9588	1769
5-2016-01-28-09-45-01	2016-01-28	09:45:00	DeKUWC	-0.388048	36.9588	1769
5-2016-01-28-09-50-01	2016-01-28	09:50:00	DeKUWC	-0.388048	36.9588	1769
5-2016-01-28-09-55-01	2016-01-28	09:55:00	DeKUWC	-0.388048	36.9588	1769
5-2016-01-28-10-00-01	2016-01-28	10:00:00	DeKUWC	-0.388048	36.9588	1769
5-2016-01-28-10-05-01	2016-01-28	10:05:00	DeKUWC	-0.388048	36.9588	1769
5-2016-01-28-10-10-01	2016-01-28	10:10:00	DeKUWC	-0.388048	36.9588	1769
5-2016-01-28-10-15-01	2016-01-28	10:15:00	DeKUWC	-0.388048	36.9588	1769
5-2016-01-28-10-20-01	2016-01-28	10:20:00	DeKUWC	-0.388048	36.9588	1769
5-2016-01-28-10-25-01	2016-01-28	10:25:00	DeKUWC	-0.388048	36.9588	1769
5-2016-01-28-10-30-02	2016-01-28	10:30:00	DeKUWC	-0.388048	36.9588	1769	YWGR;TRBO
5-2016-01-28-10-35-01	2016-01-28	10:35:00	DeKUWC	-0.388048	36.9588	1769	GBCA		Foreground knocks
5-2016-01-28-10-40-01	2016-01-28	10:40:00	DeKUWC	-0.388048	36.9588	1769	GBCA	YWGR
5-2016-01-28-10-45-01	2016-01-28	10:45:00	DeKUWC	-0.388048	36.9588	1769
5-2016-01-28-10-50-01	2016-01-28	10:50:00	DeKUWC	-0.388048	36.9588	1769
5-2016-01-28-10-55-01	2016-01-28	10:55:00	DeKUWC	-0.388048	36.9588	1769
5-2016-01-28-11-00-01	2016-01-28	11:00:00	DeKUWC	-0.388048	36.9588	1769
5-2016-01-28-11-05-01	2016-01-28	11:05:00	DeKUWC	-0.388048	36.9588	1769
5-2016-01-28-11-10-01	2016-01-28	11:10:00	DeKUWC	-0.388048	36.9588	1769
5-2016-01-28-11-15-01	2016-01-28	11:15:00	DeKUWC	-0.388048	36.9588	1769
5-2016-01-28-11-20-01	2016-01-28	11:20:00	DeKUWC	-0.388048	36.9588	1769
5-2016-01-28-11-25-01	2016-01-28	11:25:00	DeKUWC	-0.388048	36.9588	1769
5-2016-01-28-11-30-01	2016-01-28	11:30:00	DeKUWC	-0.388048	36.9588	1769
5-2016-01-28-11-35-01	2016-01-28	11:35:00	DeKUWC	-0.388048	36.9588	1769
5-2016-01-28-11-40-01	2016-01-28	11:40:00	DeKUWC	-0.388048	36.9588	1769
5-2016-01-28-11-45-01	2016-01-28	11:45:00	DeKUWC	-0.388048	36.9588	1769
5-2016-01-28-11-50-01	2016-01-28	11:50:00	DeKUWC	-0.388048	36.9588	1769
5-2016-01-28-11-55-02	2016-01-28	11:55:00	DeKUWC	-0.388048	36.9588	1769
5-2016-01-28-12-00-01	2016-01-28	12:00:00	DeKUWC	-0.388048	36.9588	1769
5-2016-01-28-12-05-01	2016-01-28	12:05:00	DeKUWC	-0.388048	36.9588	1769
5-2016-01-28-12-10-01	2016-01-28	12:10:00	DeKUWC	-0.388048	36.9588	1769
5-2016-01-28-12-15-01	2016-01-28	12:15:00	DeKUWC	-0.388048	36.9588	1769
5-2016-01-28-12-20-01	2016-01-28	12:20:00	DeKUWC	-0.388048	36.9588	1769
5-2016-01-28-12-25-01	2016-01-28	12:25:00	DeKUWC	-0.388048	36.9588	1769
5-2016-01-28-12-30-01	2016-01-28	12:30:00	DeKUWC	-0.388048	36.9588	1769	GBCA	YWGR;HATU
5-2016-01-28-12-35-01	2016-01-28	12:35:00	DeKUWC	-0.388048	36.9588	1769
5-2016-01-28-12-40-01	2016-01-28	12:40:00	DeKUWC	-0.388048	36.9588	1769
5-2016-01-28-12-45-01	2016-01-28	12:45:00	DeKUWC	-0.388048	36.9588	1769	YWGR	GBCA;HATU
5-2016-01-28-12-50-01	2016-01-28	12:50:00	DeKUWC	-0.388048	36.9588	1769
5-2016-01-28-12-55-01	2016-01-28	12:55:00	DeKUWC	-0.388048	36.9588	1769
5-2016-01-28-13-00-01	2016-01-28	13:00:00	DeKUWC	-0.388048	36.9588	1769
5-2016-01-28-13-05-01	2016-01-28	13:05:00	DeKUWC	-0.388048	36.9588	1769
5-2016-01-28-13-10-01	2016-01-28	13:10:00	DeKUWC	-0.388048	36.9588	1769
5-2016-01-28-13-15-01	2016-01-28	13:15:00	DeKUWC	-0.388048	36.9588	1769
5-2016-01-28-13-20-01	2016-01-28	13:20:00	DeKUWC	-0.388048	36.9588	1769
5-2016-01-28-13-25-01	2016-01-28	13:25:00	DeKUWC	-0.388048	36.9588	1769
5-2016-01-28-13-30-01	2016-01-28	13:30:00	DeKUWC	-0.388048	36.9588	1769
5-2016-01-28-13-35-01	2016-01-28	13:35:00	DeKUWC	-0.388048	36.9588	1769
5-2016-01-28-13-40-01	2016-01-28	13:40:00	DeKUWC	-0.388048	36.9588	1769
5-2016-01-28-13-45-01	2016-01-28	13:45:00	DeKUWC	-0.388048	36.9588	1769
5-2016-01-28-13-50-01	2016-01-28	13:50:00	DeKUWC	-0.388048	36.9588	1769
5-2016-01-28-13-55-01	2016-01-28	13:55:00	DeKUWC	-0.388048	36.9588	1769
5-2016-01-28-14-00-01	2016-01-28	14:00:00	DeKUWC	-0.388048	36.9588	1769
5-2016-01-28-14-05-01	2016-01-28	14:05:00	DeKUWC	-0.388048	36.9588	1769
5-2016-01-28-14-10-01	2016-01-28	14:10:00	DeKUWC	-0.388048	36.9588	1769
5-2016-01-28-14-15-01	2016-01-28	14:15:00	DeKUWC	-0.388048	36.9588	1769
5-2016-01-28-14-20-01	2016-01-28	14:20:00	DeKUWC	-0.388048	36.9588	1769
5-2016-01-28-14-25-01	2016-01-28	14:25:00	DeKUWC	-0.388048	36.9588	1769
5-2016-01-28-14-30-02	2016-01-28	14:30:00	DeKUWC	-0.388048	36.9588	1769	YWGR;GBCA
5-2016-01-28-14-35-02	2016-01-28	14:35:00	DeKUWC	-0.388048	36.9588	1769	YWGR		Engine noise
5-2016-01-28-14-40-01	2016-01-28	14:40:00	DeKUWC	-0.388048	36.9588	1769
5-2016-01-28-14-45-01	2016-01-28	14:45:00	DeKUWC	-0.388048	36.9588	1769
5-2016-01-28-14-50-01	2016-01-28	14:50:00	DeKUWC	-0.388048	36.9588	1769
5-2016-01-28-14-55-01	2016-01-28	14:55:00	DeKUWC	-0.388048	36.9588	1769
5-2016-01-28-15-00-01	2016-01-28	15:00:00	DeKUWC	-0.388048	36.9588	1769
5-2016-01-28-15-05-01	2016-01-28	15:05:00	DeKUWC	-0.388048	36.9588	1769
5-2016-01-28-15-10-01	2016-01-28	15:10:00	DeKUWC	-0.388048	36.9588	1769
5-2016-01-28-15-15-01	2016-01-28	15:15:00	DeKUWC	-0.388048	36.9588	1769	YWGR	CHBA;YRTI;COSU
5-2016-01-28-15-20-01	2016-01-28	15:20:00	DeKUWC	-0.388048	36.9588	1769
5-2016-01-28-15-25-01	2016-01-28	15:25:00	DeKUWC	-0.388048	36.9588	1769
5-2016-01-28-15-30-01	2016-01-28	15:30:00	DeKUWC	-0.388048	36.9588	1769
5-2016-01-28-15-35-01	2016-01-28	15:35:00	DeKUWC	-0.388048	36.9588	1769
5-2016-01-28-15-40-01	2016-01-28	15:40:00	DeKUWC	-0.388048	36.9588	1769
5-2016-01-28-15-45-01	2016-01-28	15:45:00	DeKUWC	-0.388048	36.9588	1769	YWGR	BHOR
5-2016-01-28-15-50-01	2016-01-28	15:50:00	DeKUWC	-0.388048	36.9588	1769	YWGR	YRTI;BHOR
5-2016-01-28-15-55-02	2016-01-28	15:55:00	DeKUWC	-0.388048	36.9588	1769
5-2016-01-28-16-00-02	2016-01-28	16:00:00	DeKUWC	-0.388048	36.9588	1769
5-2016-01-28-16-05-01	2016-01-28	16:05:00	DeKUWC	-0.388048	36.9588	1769
5-2016-01-28-16-10-01	2016-01-28	16:10:00	DeKUWC	-0.388048	36.9588	1769
5-2016-01-28-16-15-01	2016-01-28	16:15:00	DeKUWC	-0.388048	36.9588	1769
5-2016-01-28-16-20-01	2016-01-28	16:20:00	DeKUWC	-0.388048	36.9588	1769
5-2016-01-28-16-25-01	2016-01-28	16:25:00	DeKUWC	-0.388048	36.9588	1769	YWGR	TRBO	People in the background and knocks
5-2016-01-28-16-30-01	2016-01-28	16:30:00	DeKUWC	-0.388048	36.9588	1769
5-2016-01-28-16-35-01	2016-01-28	16:35:00	DeKUWC	-0.388048	36.9588	1769
5-2016-01-28-16-40-01	2016-01-28	16:40:00	DeKUWC	-0.388048	36.9588	1769
5-2016-01-28-16-45-01	2016-01-28	16:45:00	DeKUWC	-0.388048	36.9588	1769	YWGR	GBCA;HATU	People's voices
5-2016-01-28-16-50-01	2016-01-28	16:50:00	DeKUWC	-0.388048	36.9588	1769
5-2016-01-28-16-55-01	2016-01-28	16:55:00	DeKUWC	-0.388048	36.9588	1769
5-2016-01-28-17-00-01	2016-01-28	17:00:00	DeKUWC	-0.388048	36.9588	1769
5-2016-01-28-17-05-01	2016-01-28	17:05:00	DeKUWC	-0.388048	36.9588	1769	YWGR;YRTI		Engine noise; Insect flying
5-2016-01-28-17-10-01	2016-01-28	17:10:00	DeKUWC	-0.388048	36.9588	1769
5-2016-01-28-17-15-01	2016-01-28	17:15:00	DeKUWC	-0.388048	36.9588	1769
5-2016-01-28-17-20-01	2016-01-28	17:20:00	DeKUWC	-0.388048	36.9588	1769
5-2016-01-28-17-25-01	2016-01-28	17:25:00	DeKUWC	-0.388048	36.9588	1769
5-2016-01-28-17-30-01	2016-01-28	17:30:00	DeKUWC	-0.388048	36.9588	1769	RCCU	YWGR	Engine noise; The Cuckoo is a juvenile
5-2016-01-28-17-35-01	2016-01-28	17:35:00	DeKUWC	-0.388048	36.9588	1769		YWGR	People preaching; Musical instruments
5-2016-01-28-17-40-01	2016-01-28	17:40:00	DeKUWC	-0.388048	36.9588	1769
5-2016-01-28-17-45-01	2016-01-28	17:45:00	DeKUWC	-0.388048	36.9588	1769
5-2016-01-28-17-50-01	2016-01-28	17:50:00	DeKUWC	-0.388048	36.9588	1769
5-2016-01-28-17-55-01	2016-01-28	17:55:00	DeKUWC	-0.388048	36.9588	1769
5-2016-01-28-18-00-01	2016-01-28	18:00:00	DeKUWC	-0.388048	36.9588	1769
5-2016-01-28-18-05-01	2016-01-28	18:05:00	DeKUWC	-0.388048	36.9588	1769
5-2016-01-28-18-10-01	2016-01-28	18:10:00	DeKUWC	-0.388048	36.9588	1769
5-2016-01-28-18-15-01	2016-01-28	18:15:00	DeKUWC	-0.388048	36.9588	1769	YWGR	SCHO	Insect noise
5-2016-01-28-18-20-01	2016-01-28	18:20:00	DeKUWC	-0.388048	36.9588	1769	YWGR;SCHO
5-2016-01-28-18-25-01	2016-01-28	18:25:00	DeKUWC	-0.388048	36.9588	1769
5-2016-01-28-18-30-01	2016-01-28	18:30:00	DeKUWC	-0.388048	36.9588	1769
5-2016-01-28-18-35-01	2016-01-28	18:35:00	DeKUWC	-0.388048	36.9588	1769
5-2016-01-28-18-40-01	2016-01-28	18:40:00	DeKUWC	-0.388048	36.9588	1769
5-2016-01-28-18-45-01	2016-01-28	18:45:00	DeKUWC	-0.388048	36.9588	1769
5-2016-01-28-18-50-01	2016-01-28	18:50:00	DeKUWC	-0.388048	36.9588	1769
5-2016-01-28-18-55-01	2016-01-28	18:55:00	DeKUWC	-0.388048	36.9588	1769
5-2016-01-28-19-00-01	2016-01-28	19:00:00	DeKUWC	-0.388048	36.9588	1769
5-2016-01-28-19-05-01	2016-01-28	19:05:00	DeKUWC	-0.388048	36.9588	1769
5-2016-01-28-19-10-01	2016-01-28	19:10:00	DeKUWC	-0.388048	36.9588	1769
5-2016-01-28-19-15-02	2016-01-28	19:15:00	DeKUWC	-0.388048	36.9588	1769
5-2016-01-28-19-20-01	2016-01-28	19:20:00	DeKUWC	-0.388048	36.9588	1769
5-2016-01-28-19-25-01	2016-01-28	19:25:00	DeKUWC	-0.388048	36.9588	1769
5-2016-01-28-19-30-01	2016-01-28	19:30:00	DeKUWC	-0.388048	36.9588	1769
5-2016-01-28-19-35-01	2016-01-28	19:35:00	DeKUWC	-0.388048	36.9588	1769
5-2016-01-28-19-40-01	2016-01-28	19:40:00	DeKUWC	-0.388048	36.9588	1769
5-2016-01-28-19-45-01	2016-01-28	19:45:00	DeKUWC	-0.388048	36.9588	1769
5-2016-01-28-19-50-01	2016-01-28	19:50:00	DeKUWC	-0.388048	36.9588	1769
5-2016-01-28-19-55-01	2016-01-28	19:55:00	DeKUWC	-0.388048	36.9588	1769
5-2016-01-28-20-00-01	2016-01-28	20:00:00	DeKUWC	-0.388048	36.9588	1769
5-2016-01-28-20-05-01	2016-01-28	20:05:00	DeKUWC	-0.388048	36.9588	1769
5-2016-01-28-20-10-02	2016-01-28	20:10:00	DeKUWC	-0.388048	36.9588	1769
5-2016-01-28-20-15-02	2016-01-28	20:15:00	DeKUWC	-0.388048	36.9588	1769
5-2016-01-28-20-20-01	2016-01-28	20:20:00	DeKUWC	-0.388048	36.9588	1769
5-2016-01-28-20-25-01	2016-01-28	20:25:00	DeKUWC	-0.388048	36.9588	1769
5-2016-01-28-20-30-01	2016-01-28	20:30:00	DeKUWC	-0.388048	36.9588	1769
5-2016-01-28-20-35-01	2016-01-28	20:35:00	DeKUWC	-0.388048	36.9588	1769
5-2016-01-28-20-40-01	2016-01-28	20:40:00	DeKUWC	-0.388048	36.9588	1769
5-2016-01-28-20-45-01	2016-01-28	20:45:00	DeKUWC	-0.388048	36.9588	1769
5-2016-01-28-20-50-01	2016-01-28	20:50:00	DeKUWC	-0.388048	36.9588	1769
5-2016-01-28-20-55-01	2016-01-28	20:55:00	DeKUWC	-0.388048	36.9588	1769
5-2016-01-28-21-00-01	2016-01-28	21:00:00	DeKUWC	-0.388048	36.9588	1769
5-2016-01-28-21-05-01	2016-01-28	21:05:00	DeKUWC	-0.388048	36.9588	1769
5-2016-01-28-21-10-02	2016-01-28	21:10:00	DeKUWC	-0.388048	36.9588	1769
5-2016-01-28-21-15-01	2016-01-28	21:15:00	DeKUWC	-0.388048	36.9588	1769
5-2016-01-28-21-20-01	2016-01-28	21:20:00	DeKUWC	-0.388048	36.9588	1769
5-2016-01-28-21-25-01	2016-01-28	21:25:00	DeKUWC	-0.388048	36.9588	1769
5-2016-01-28-21-30-01	2016-01-28	21:30:00	DeKUWC	-0.388048	36.9588	1769
5-2016-01-28-21-35-01	2016-01-28	21:35:00	DeKUWC	-0.388048	36.9588	1769
5-2016-01-28-21-40-01	2016-01-28	21:40:00	DeKUWC	-0.388048	36.9588	1769
5-2016-01-28-21-45-01	2016-01-28	21:45:00	DeKUWC	-0.388048	36.9588	1769
5-2016-01-28-21-50-01	2016-01-28	21:50:00	DeKUWC	-0.388048	36.9588	1769
5-2016-01-28-21-55-01	2016-01-28	21:55:00	DeKUWC	-0.388048	36.9588	1769
5-2016-01-28-22-00-01	2016-01-28	22:00:00	DeKUWC	-0.388048	36.9588	1769
5-2016-01-28-22-05-02	2016-01-28	22:05:00	DeKUWC	-0.388048	36.9588	1769
5-2016-01-28-22-10-01	2016-01-28	22:10:00	DeKUWC	-0.388048	36.9588	1769
5-2016-01-28-22-15-01	2016-01-28	22:15:00	DeKUWC	-0.388048	36.9588	1769
5-2016-01-28-22-20-01	2016-01-28	22:20:00	DeKUWC	-0.388048	36.9588	1769
5-2016-01-28-22-25-01	2016-01-28	22:25:00	DeKUWC	-0.388048	36.9588	1769
5-2016-01-28-22-30-01	2016-01-28	22:30:00	DeKUWC	-0.388048	36.9588	1769
5-2016-01-28-22-35-01	2016-01-28	22:35:00	DeKUWC	-0.388048	36.9588	1769
5-2016-01-28-22-40-01	2016-01-28	22:40:00	DeKUWC	-0.388048	36.9588	1769
5-2016-01-28-22-45-01	2016-01-28	22:45:00	DeKUWC	-0.388048	36.9588	1769
5-2016-01-28-22-50-01	2016-01-28	22:50:00	DeKUWC	-0.388048	36.9588	1769
5-2016-01-28-22-55-01	2016-01-28	22:55:00	DeKUWC	-0.388048	36.9588	1769
5-2016-01-28-23-00-02	2016-01-28	23:00:00	DeKUWC	-0.388048	36.9588	1769
5-2016-01-28-23-05-02	2016-01-28	23:05:00	DeKUWC	-0.388048	36.9588	1769
5-2016-01-28-23-10-01	2016-01-28	23:10:00	DeKUWC	-0.388048	36.9588	1769
5-2016-01-28-23-15-01	2016-01-28	23:15:00	DeKUWC	-0.388048	36.9588	1769
5-2016-01-28-23-20-01	2016-01-28	23:20:00	DeKUWC	-0.388048	36.9588	1769
5-2016-01-28-23-25-01	2016-01-28	23:25:00	DeKUWC	-0.388048	36.9588	1769
5-2016-01-28-23-30-01	2016-01-28	23:30:00	DeKUWC	-0.388048	36.9588	1769
5-2016-01-28-23-35-01	2016-01-28	23:35:00	DeKUWC	-0.388048	36.9588	1769
5-2016-01-28-23-40-01	2016-01-28	23:40:00	DeKUWC	-0.388048	36.9588	1769
5-2016-01-28-23-45-01	2016-01-28	23:45:00	DeKUWC	-0.388048	36.9588	1769
5-2016-01-28-23-50-01	2016-01-28	23:50:00	DeKUWC	-0.388048	36.9588	1769
5-2016-01-28-23-55-01	2016-01-28	23:55:00	DeKUWC	-0.388048	36.9588	1769
5-2016-01-29-00-00-02	2016-01-29	00:00:00	DeKUWC	-0.388048	36.9588	1769
5-2016-01-29-00-05-01	2016-01-29	00:05:00	DeKUWC	-0.388048	36.9588	1769
5-2016-01-29-00-10-01	2016-01-29	00:10:00	DeKUWC	-0.388048	36.9588	1769
5-2016-01-29-00-15-01	2016-01-29	00:15:00	DeKUWC	-0.388048	36.9588	1769
5-2016-01-29-00-20-01	2016-01-29	00:20:00	DeKUWC	-0.388048	36.9588	1769
5-2016-01-29-00-25-01	2016-01-29	00:25:00	DeKUWC	-0.388048	36.9588	1769
5-2016-01-29-00-30-01	2016-01-29	00:30:00	DeKUWC	-0.388048	36.9588	1769
5-2016-01-29-00-35-01	2016-01-29	00:35:00	DeKUWC	-0.388048	36.9588	1769
5-2016-01-29-00-40-01	2016-01-29	00:40:00	DeKUWC	-0.388048	36.9588	1769
5-2016-01-29-00-45-01	2016-01-29	00:45:00	DeKUWC	-0.388048	36.9588	1769
5-2016-01-29-00-50-01	2016-01-29	00:50:00	DeKUWC	-0.388048	36.9588	1769
5-2016-01-29-00-55-02	2016-01-29	00:55:00	DeKUWC	-0.388048	36.9588	1769
5-2016-01-29-01-00-01	2016-01-29	01:00:00	DeKUWC	-0.388048	36.9588	1769
5-2016-01-29-01-05-01	2016-01-29	01:05:00	DeKUWC	-0.388048	36.9588	1769
5-2016-01-29-01-10-01	2016-01-29	01:10:00	DeKUWC	-0.388048	36.9588	1769
5-2016-01-29-01-15-01	2016-01-29	01:15:00	DeKUWC	-0.388048	36.9588	1769
5-2016-01-29-01-20-01	2016-01-29	01:20:00	DeKUWC	-0.388048	36.9588	1769
5-2016-01-29-01-25-01	2016-01-29	01:25:00	DeKUWC	-0.388048	36.9588	1769
5-2016-01-29-01-30-01	2016-01-29	01:30:00	DeKUWC	-0.388048	36.9588	1769
5-2016-01-29-01-35-01	2016-01-29	01:35:00	DeKUWC	-0.388048	36.9588	1769
5-2016-01-29-01-40-01	2016-01-29	01:40:00	DeKUWC	-0.388048	36.9588	1769
5-2016-01-29-01-45-01	2016-01-29	01:45:00	DeKUWC	-0.388048	36.9588	1769
5-2016-01-29-01-50-02	2016-01-29	01:50:00	DeKUWC	-0.388048	36.9588	1769
5-2016-01-29-01-55-01	2016-01-29	01:55:00	DeKUWC	-0.388048	36.9588	1769
5-2016-01-29-02-00-01	2016-01-29	02:00:00	DeKUWC	-0.388048	36.9588	1769
5-2016-01-29-02-05-01	2016-01-29	02:05:00	DeKUWC	-0.388048	36.9588	1769
5-2016-01-29-02-10-01	2016-01-29	02:10:00	DeKUWC	-0.388048	36.9588	1769
5-2016-01-29-02-15-01	2016-01-29	02:15:00	DeKUWC	-0.388048	36.9588	1769
5-2016-01-29-02-20-01	2016-01-29	02:20:00	DeKUWC	-0.388048	36.9588	1769
5-2016-01-29-02-25-01	2016-01-29	02:25:00	DeKUWC	-0.388048	36.9588	1769
5-2016-01-29-02-30-01	2016-01-29	02:30:00	DeKUWC	-0.388048	36.9588	1769
5-2016-01-29-02-35-01	2016-01-29	02:35:00	DeKUWC	-0.388048	36.9588	1769
5-2016-01-29-02-40-01	2016-01-29	02:40:00	DeKUWC	-0.388048	36.9588	1769
5-2016-01-29-02-45-01	2016-01-29	02:45:00	DeKUWC	-0.388048	36.9588	1769
5-2016-01-29-02-50-02	2016-01-29	02:50:00	DeKUWC	-0.388048	36.9588	1769
5-2016-01-29-02-55-01	2016-01-29	02:55:00	DeKUWC	-0.388048	36.9588	1769
5-2016-01-29-03-00-01	2016-01-29	03:00:00	DeKUWC	-0.388048	36.9588	1769
5-2016-01-29-03-05-01	2016-01-29	03:05:00	DeKUWC	-0.388048	36.9588	1769
5-2016-01-29-03-10-01	2016-01-29	03:10:00	DeKUWC	-0.388048	36.9588	1769
5-2016-01-29-03-15-01	2016-01-29	03:15:00	DeKUWC	-0.388048	36.9588	1769
5-2016-01-29-03-20-01	2016-01-29	03:20:00	DeKUWC	-0.388048	36.9588	1769
5-2016-01-29-03-25-01	2016-01-29	03:25:00	DeKUWC	-0.388048	36.9588	1769
5-2016-01-29-03-30-01	2016-01-29	03:30:00	DeKUWC	-0.388048	36.9588	1769
5-2016-01-29-03-35-01	2016-01-29	03:35:00	DeKUWC	-0.388048	36.9588	1769
5-2016-01-29-03-40-01	2016-01-29	03:40:00	DeKUWC	-0.388048	36.9588	1769
5-2016-01-29-03-45-02	2016-01-29	03:45:00	DeKUWC	-0.388048	36.9588	1769
5-2016-01-29-03-50-01	2016-01-29	03:50:00	DeKUWC	-0.388048	36.9588	1769
5-2016-01-29-03-55-01	2016-01-29	03:55:00	DeKUWC	-0.388048	36.9588	1769
5-2016-01-29-04-00-01	2016-01-29	04:00:00	DeKUWC	-0.388048	36.9588	1769
5-2016-01-29-04-05-01	2016-01-29	04:05:00	DeKUWC	-0.388048	36.9588	1769
5-2016-01-29-04-10-01	2016-01-29	04:10:00	DeKUWC	-0.388048	36.9588	1769
5-2016-01-29-04-15-01	2016-01-29	04:15:00	DeKUWC	-0.388048	36.9588	1769
5-2016-01-29-04-20-01	2016-01-29	04:20:00	DeKUWC	-0.388048	36.9588	1769
5-2016-01-29-04-25-01	2016-01-29	04:25:00	DeKUWC	-0.388048	36.9588	1769
5-2016-01-29-04-30-01	2016-01-29	04:30:00	DeKUWC	-0.388048	36.9588	1769
5-2016-01-29-04-35-01	2016-01-29	04:35:00	DeKUWC	-0.388048	36.9588	1769
5-2016-01-29-04-40-02	2016-01-29	04:40:00	DeKUWC	-0.388048	36.9588	1769
5-2016-01-29-04-45-01	2016-01-29	04:45:00	DeKUWC	-0.388048	36.9588	1769
5-2016-01-29-04-50-01	2016-01-29	04:50:00	DeKUWC	-0.388048	36.9588	1769
5-2016-01-29-04-55-01	2016-01-29	04:55:00	DeKUWC	-0.388048	36.9588	1769
5-2016-01-29-05-00-01	2016-01-29	05:00:00	DeKUWC	-0.388048	36.9588	1769
5-2016-01-29-05-05-01	2016-01-29	05:05:00	DeKUWC	-0.388048	36.9588	1769
5-2016-01-29-05-10-01	2016-01-29	05:10:00	DeKUWC	-0.388048	36.9588	1769
5-2016-01-29-05-15-01	2016-01-29	05:15:00	DeKUWC	-0.388048	36.9588	1769
5-2016-01-29-05-20-01	2016-01-29	05:20:00	DeKUWC	-0.388048	36.9588	1769
5-2016-01-29-05-25-01	2016-01-29	05:25:00	DeKUWC	-0.388048	36.9588	1769
5-2016-01-29-05-30-01	2016-01-29	05:30:00	DeKUWC	-0.388048	36.9588	1769
5-2016-01-29-05-35-01	2016-01-29	05:35:00	DeKUWC	-0.388048	36.9588	1769
5-2016-01-29-05-40-02	2016-01-29	05:40:00	DeKUWC	-0.388048	36.9588	1769
5-2016-01-29-05-45-01	2016-01-29	05:45:00	DeKUWC	-0.388048	36.9588	1769
5-2016-01-29-05-50-01	2016-01-29	05:50:00	DeKUWC	-0.388048	36.9588	1769
5-2016-01-29-05-55-01	2016-01-29	05:55:00	DeKUWC	-0.388048	36.9588	1769
5-2016-01-29-06-00-01	2016-01-29	06:00:00	DeKUWC	-0.388048	36.9588	1769
5-2016-01-29-06-05-01	2016-01-29	06:05:00	DeKUWC	-0.388048	36.9588	1769
5-2016-01-29-06-10-01	2016-01-29	06:10:00	DeKUWC	-0.388048	36.9588	1769		HATU	Perhaps a BBPU
5-2016-01-29-06-15-01	2016-01-29	06:15:00	DeKUWC	-0.388048	36.9588	1769
5-2016-01-29-06-20-01	2016-01-29	06:20:00	DeKUWC	-0.388048	36.9588	1769
5-2016-01-29-06-25-01	2016-01-29	06:25:00	DeKUWC	-0.388048	36.9588	1769
5-2016-01-29-06-30-01	2016-01-29	06:30:00	DeKUWC	-0.388048	36.9588	1769
5-2016-01-29-06-35-02	2016-01-29	06:35:00	DeKUWC	-0.388048	36.9588	1769
5-2016-01-29-06-40-01	2016-01-29	06:40:00	DeKUWC	-0.388048	36.9588	1769
5-2016-01-29-06-45-01	2016-01-29	06:45:00	DeKUWC	-0.388048	36.9588	1769
5-2016-01-29-06-50-01	2016-01-29	06:50:00	DeKUWC	-0.388048	36.9588	1769	YWGR	BBPU;BTWE;HATU;BWWA
5-2016-01-29-06-55-01	2016-01-29	06:55:00	DeKUWC	-0.388048	36.9588	1769
5-2016-01-29-07-00-01	2016-01-29	07:00:00	DeKUWC	-0.388048	36.9588	1769	YWGR	GBCA
5-2016-01-29-07-05-01	2016-01-29	07:05:00	DeKUWC	-0.388048	36.9588	1769
5-2016-01-29-07-10-01	2016-01-29	07:10:00	DeKUWC	-0.388048	36.9588	1769
5-2016-01-29-07-15-01	2016-01-29	07:15:00	DeKUWC	-0.388048	36.9588	1769
5-2016-01-29-07-20-01	2016-01-29	07:20:00	DeKUWC	-0.388048	36.9588	1769	YWGR;GBCA	TRBO
5-2016-01-29-07-25-01	2016-01-29	07:25:00	DeKUWC	-0.388048	36.9588	1769
5-2016-01-29-07-30-01	2016-01-29	07:30:00	DeKUWC	-0.388048	36.9588	1769
5-2016-01-29-07-35-01	2016-01-29	07:35:00	DeKUWC	-0.388048	36.9588	1769	YWGR;GBCA	BWWA	Engine noise
5-2016-01-29-07-40-01	2016-01-29	07:40:00	DeKUWC	-0.388048	36.9588	1769
5-2016-01-29-07-45-01	2016-01-29	07:45:00	DeKUWC	-0.388048	36.9588	1769
5-2016-01-29-07-50-01	2016-01-29	07:50:00	DeKUWC	-0.388048	36.9588	1769
5-2016-01-29-07-55-01	2016-01-29	07:55:00	DeKUWC	-0.388048	36.9588	1769
5-2016-01-29-08-00-02	2016-01-29	08:00:00	DeKUWC	-0.388048	36.9588	1769
5-2016-01-29-08-05-01	2016-01-29	08:05:00	DeKUWC	-0.388048	36.9588	1769
5-2016-01-29-08-10-01	2016-01-29	08:10:00	DeKUWC	-0.388048	36.9588	1769
5-2016-01-29-08-15-01	2016-01-29	08:15:00	DeKUWC	-0.388048	36.9588	1769
5-2016-01-29-08-20-01	2016-01-29	08:20:00	DeKUWC	-0.388048	36.9588	1769
5-2016-01-29-08-25-01	2016-01-29	08:25:00	DeKUWC	-0.388048	36.9588	1769
5-2016-01-29-08-30-01	2016-01-29	08:30:00	DeKUWC	-0.388048	36.9588	1769
5-2016-01-29-08-35-01	2016-01-29	08:35:00	DeKUWC	-0.388048	36.9588	1769
5-2016-01-29-08-40-01	2016-01-29	08:40:00	DeKUWC	-0.388048	36.9588	1769		TRBO;GBCA;YWGR;HATU;BWWA;YRTI	Foreground knocks
5-2016-01-29-08-45-01	2016-01-29	08:45:00	DeKUWC	-0.388048	36.9588	1769
5-2016-01-29-08-50-01	2016-01-29	08:50:00	DeKUWC	-0.388048	36.9588	1769
5-2016-01-29-08-55-01	2016-01-29	08:55:00	DeKUWC	-0.388048	36.9588	1769
5-2016-01-29-09-00-01	2016-01-29	09:00:00	DeKUWC	-0.388048	36.9588	1769
5-2016-01-29-09-05-01	2016-01-29	09:05:00	DeKUWC	-0.388048	36.9588	1769
5-2016-01-29-09-10-01	2016-01-29	09:10:00	DeKUWC	-0.388048	36.9588	1769
5-2016-01-29-09-15-01	2016-01-29	09:15:00	DeKUWC	-0.388048	36.9588	1769
5-2016-01-29-09-20-01	2016-01-29	09:20:00	DeKUWC	-0.388048	36.9588	1769
5-2016-01-29-09-25-01	2016-01-29	09:25:00	DeKUWC	-0.388048	36.9588	1769
5-2016-01-29-09-30-01	2016-01-29	09:30:00	DeKUWC	-0.388048	36.9588	1769
5-2016-01-29-09-35-01	2016-01-29	09:35:00	DeKUWC	-0.388048	36.9588	1769
5-2016-01-29-09-40-01	2016-01-29	09:40:00	DeKUWC	-0.388048	36.9588	1769
5-2016-01-29-09-45-01	2016-01-29	09:45:00	DeKUWC	-0.388048	36.9588	1769
5-2016-01-29-09-50-01	2016-01-29	09:50:00	DeKUWC	-0.388048	36.9588	1769
5-2016-01-29-09-55-01	2016-01-29	09:55:00	DeKUWC	-0.388048	36.9588	1769
5-2016-01-29-10-00-01	2016-01-29	10:00:00	DeKUWC	-0.388048	36.9588	1769
5-2016-01-29-10-05-01	2016-01-29	10:05:00	DeKUWC	-0.388048	36.9588	1769
5-2016-01-29-10-10-01	2016-01-29	10:10:00	DeKUWC	-0.388048	36.9588	1769
5-2016-01-29-10-15-01	2016-01-29	10:15:00	DeKUWC	-0.388048	36.9588	1769
5-2016-01-29-10-20-01	2016-01-29	10:20:00	DeKUWC	-0.388048	36.9588	1769
5-2016-01-29-10-25-01	2016-01-29	10:25:00	DeKUWC	-0.388048	36.9588	1769
5-2016-01-29-10-30-01	2016-01-29	10:30:00	DeKUWC	-0.388048	36.9588	1769
5-2016-01-29-10-35-02	2016-01-29	10:35:00	DeKUWC	-0.388048	36.9588	1769
5-2016-01-29-10-40-01	2016-01-29	10:40:00	DeKUWC	-0.388048	36.9588	1769
5-2016-01-29-10-45-01	2016-01-29	10:45:00	DeKUWC	-0.388048	36.9588	1769
5-2016-01-29-10-50-01	2016-01-29	10:50:00	DeKUWC	-0.388048	36.9588	1769
5-2016-01-29-10-55-01	2016-01-29	10:55:00	DeKUWC	-0.388048	36.9588	1769
5-2016-01-29-11-00-01	2016-01-29	11:00:00	DeKUWC	-0.388048	36.9588	1769
5-2016-01-29-11-05-01	2016-01-29	11:05:00	DeKUWC	-0.388048	36.9588	1769
5-2016-01-29-11-10-01	2016-01-29	11:10:00	DeKUWC	-0.388048	36.9588	1769
5-2016-01-29-11-15-01	2016-01-29	11:15:00	DeKUWC	-0.388048	36.9588	1769
5-2016-01-29-11-20-01	2016-01-29	11:20:00	DeKUWC	-0.388048	36.9588	1769
5-2016-01-29-11-25-01	2016-01-29	11:25:00	DeKUWC	-0.388048	36.9588	1769
5-2016-01-29-11-30-01	2016-01-29	11:30:00	DeKUWC	-0.388048	36.9588	1769
5-2016-01-29-11-35-01	2016-01-29	11:35:00	DeKUWC	-0.388048	36.9588	1769
5-2016-01-29-11-40-01	2016-01-29	11:40:00	DeKUWC	-0.388048	36.9588	1769
5-2016-01-29-11-45-01	2016-01-29	11:45:00	DeKUWC	-0.388048	36.9588	1769
5-2016-01-29-11-50-01	2016-01-29	11:50:00	DeKUWC	-0.388048	36.9588	1769
5-2016-01-29-11-55-01	2016-01-29	11:55:00	DeKUWC	-0.388048	36.9588	1769
5-2016-01-29-12-00-02	2016-01-29	12:00:00	DeKUWC	-0.388048	36.9588	1769	YRTI	YWGR;HATU
5-2016-01-29-12-05-01	2016-01-29	12:05:00	DeKUWC	-0.388048	36.9588	1769	YRTI;YWGR
5-2016-01-29-12-10-01	2016-01-29	12:10:00	DeKUWC	-0.388048	36.9588	1769
5-2016-01-29-12-15-01	2016-01-29	12:15:00	DeKUWC	-0.388048	36.9588	1769
5-2016-01-29-12-20-01	2016-01-29	12:20:00	DeKUWC	-0.388048	36.9588	1769		YRTI;HATU;YWGR
5-2016-01-29-12-25-01	2016-01-29	12:25:00	DeKUWC	-0.388048	36.9588	1769
5-2016-01-29-12-30-01	2016-01-29	12:30:00	DeKUWC	-0.388048	36.9588	1769
5-2016-01-29-12-35-01	2016-01-29	12:35:00	DeKUWC	-0.388048	36.9588	1769
5-2016-01-29-12-40-01	2016-01-29	12:40:00	DeKUWC	-0.388048	36.9588	1769
5-2016-01-29-12-45-01	2016-01-29	12:45:00	DeKUWC	-0.388048	36.9588	1769
5-2016-01-29-12-50-01	2016-01-29	12:50:00	DeKUWC	-0.388048	36.9588	1769
5-2016-01-29-12-55-01	2016-01-29	12:55:00	DeKUWC	-0.388048	36.9588	1769
5-2016-01-29-13-00-01	2016-01-29	13:00:00	DeKUWC	-0.388048	36.9588	1769
5-2016-01-29-13-05-01	2016-01-29	13:05:00	DeKUWC	-0.388048	36.9588	1769
5-2016-01-29-13-10-01	2016-01-29	13:10:00	DeKUWC	-0.388048	36.9588	1769
5-2016-01-29-13-15-01	2016-01-29	13:15:00	DeKUWC	-0.388048	36.9588	1769

## Sheet: 6
Filename	Date	Time	Location	Latitude	Longitude	Elevation	Foreground Species	Background Species	Remarks
6-2016-01-28-09-00-01	2016-01-28	09:00:00	DeKUWC	-0.38812	36.9578	1771
6-2016-01-28-09-05-01	2016-01-28	09:05:00	DeKUWC	-0.38812	36.9578	1771
6-2016-01-28-09-10-02	2016-01-28	09:10:00	DeKUWC	-0.38812	36.9578	1771
6-2016-01-28-09-15-02	2016-01-28	09:15:00	DeKUWC	-0.38812	36.9578	1771
6-2016-01-28-09-20-01	2016-01-28	09:20:00	DeKUWC	-0.38812	36.9578	1771
6-2016-01-28-09-25-01	2016-01-28	09:25:00	DeKUWC	-0.38812	36.9578	1771	GBCA;TRBO	YRTI	Knocking sound; Engine noise
6-2016-01-28-09-30-01	2016-01-28	09:30:00	DeKUWC	-0.38812	36.9578	1771
6-2016-01-28-09-35-01	2016-01-28	09:35:00	DeKUWC	-0.38812	36.9578	1771
6-2016-01-28-09-40-01	2016-01-28	09:40:00	DeKUWC	-0.38812	36.9578	1771
6-2016-01-28-09-45-01	2016-01-28	09:45:00	DeKUWC	-0.38812	36.9578	1771
6-2016-01-28-09-50-01	2016-01-28	09:50:00	DeKUWC	-0.38812	36.9578	1771
6-2016-01-28-09-55-01	2016-01-28	09:55:00	DeKUWC	-0.38812	36.9578	1771
6-2016-01-28-10-00-01	2016-01-28	10:00:00	DeKUWC	-0.38812	36.9578	1771
6-2016-01-28-10-05-01	2016-01-28	10:05:00	DeKUWC	-0.38812	36.9578	1771		TRBO;YWGR;BBPU	Engine noise;Insect noise
6-2016-01-28-10-10-01	2016-01-28	10:10:00	DeKUWC	-0.38812	36.9578	1771
6-2016-01-28-10-15-01	2016-01-28	10:15:00	DeKUWC	-0.38812	36.9578	1771
6-2016-01-28-10-20-01	2016-01-28	10:20:00	DeKUWC	-0.38812	36.9578	1771
6-2016-01-28-10-25-02	2016-01-28	10:25:00	DeKUWC	-0.38812	36.9578	1771
6-2016-01-28-10-30-01	2016-01-28	10:30:00	DeKUWC	-0.38812	36.9578	1771
6-2016-01-28-10-35-01	2016-01-28	10:35:00	DeKUWC	-0.38812	36.9578	1771
6-2016-01-28-10-40-01	2016-01-28	10:40:00	DeKUWC	-0.38812	36.9578	1771
6-2016-01-28-10-45-01	2016-01-28	10:45:00	DeKUWC	-0.38812	36.9578	1771
6-2016-01-28-10-50-01	2016-01-28	10:50:00	DeKUWC	-0.38812	36.9578	1771
6-2016-01-28-10-55-01	2016-01-28	10:55:00	DeKUWC	-0.38812	36.9578	1771
6-2016-01-28-11-00-01	2016-01-28	11:00:00	DeKUWC	-0.38812	36.9578	1771
6-2016-01-28-11-05-01	2016-01-28	11:05:00	DeKUWC	-0.38812	36.9578	1771	BBPU;GBCA	YWGR	Engine noise
6-2016-01-28-11-10-01	2016-01-28	11:10:00	DeKUWC	-0.38812	36.9578	1771
6-2016-01-28-11-15-01	2016-01-28	11:15:00	DeKUWC	-0.38812	36.9578	1771
6-2016-01-28-11-20-01	2016-01-28	11:20:00	DeKUWC	-0.38812	36.9578	1771
6-2016-01-28-11-25-01	2016-01-28	11:25:00	DeKUWC	-0.38812	36.9578	1771
6-2016-01-28-11-30-01	2016-01-28	11:30:00	DeKUWC	-0.38812	36.9578	1771
6-2016-01-28-11-35-01	2016-01-28	11:35:00	DeKUWC	-0.38812	36.9578	1771
6-2016-01-28-11-40-01	2016-01-28	11:40:00	DeKUWC	-0.38812	36.9578	1771
6-2016-01-28-11-45-01	2016-01-28	11:45:00	DeKUWC	-0.38812	36.9578	1771
6-2016-01-28-11-50-02	2016-01-28	11:50:00	DeKUWC	-0.38812	36.9578	1771
6-2016-01-28-11-55-01	2016-01-28	11:55:00	DeKUWC	-0.38812	36.9578	1771
6-2016-01-28-12-00-01	2016-01-28	12:00:00	DeKUWC	-0.38812	36.9578	1771	GBCA;YRTI
6-2016-01-28-12-05-01	2016-01-28	12:05:00	DeKUWC	-0.38812	36.9578	1771
6-2016-01-28-12-10-01	2016-01-28	12:10:00	DeKUWC	-0.38812	36.9578	1771
6-2016-01-28-12-15-01	2016-01-28	12:15:00	DeKUWC	-0.38812	36.9578	1771
6-2016-01-28-12-20-01	2016-01-28	12:20:00	DeKUWC	-0.38812	36.9578	1771	TRBO		Vocalisation at the end; Engine noise
6-2016-01-28-12-25-01	2016-01-28	12:25:00	DeKUWC	-0.38812	36.9578	1771
6-2016-01-28-12-30-01	2016-01-28	12:30:00	DeKUWC	-0.38812	36.9578	1771
6-2016-01-28-12-35-01	2016-01-28	12:35:00	DeKUWC	-0.38812	36.9578	1771
6-2016-01-28-12-40-01	2016-01-28	12:40:00	DeKUWC	-0.38812	36.9578	1771
6-2016-01-28-12-45-01	2016-01-28	12:45:00	DeKUWC	-0.38812	36.9578	1771
6-2016-01-28-12-50-01	2016-01-28	12:50:00	DeKUWC	-0.38812	36.9578	1771
6-2016-01-28-12-55-01	2016-01-28	12:55:00	DeKUWC	-0.38812	36.9578	1771
6-2016-01-28-13-00-01	2016-01-28	13:00:00	DeKUWC	-0.38812	36.9578	1771
6-2016-01-28-13-05-01	2016-01-28	13:05:00	DeKUWC	-0.38812	36.9578	1771	YRTI	YWGR	Engine noise; Possible SCHO
6-2016-01-28-13-10-01	2016-01-28	13:10:00	DeKUWC	-0.38812	36.9578	1771
6-2016-01-28-13-15-02	2016-01-28	13:15:00	DeKUWC	-0.38812	36.9578	1771
6-2016-01-28-13-20-01	2016-01-28	13:20:00	DeKUWC	-0.38812	36.9578	1771
6-2016-01-28-13-25-01	2016-01-28	13:25:00	DeKUWC	-0.38812	36.9578	1771
6-2016-01-28-13-30-01	2016-01-28	13:30:00	DeKUWC	-0.38812	36.9578	1771
6-2016-01-28-13-35-01	2016-01-28	13:35:00	DeKUWC	-0.38812	36.9578	1771
6-2016-01-28-13-40-01	2016-01-28	13:40:00	DeKUWC	-0.38812	36.9578	1771
6-2016-01-28-13-45-01	2016-01-28	13:45:00	DeKUWC	-0.38812	36.9578	1771
6-2016-01-28-13-50-01	2016-01-28	13:50:00	DeKUWC	-0.38812	36.9578	1771
6-2016-01-28-13-55-01	2016-01-28	13:55:00	DeKUWC	-0.38812	36.9578	1771
6-2016-01-28-14-00-01	2016-01-28	14:00:00	DeKUWC	-0.38812	36.9578	1771
6-2016-01-28-14-05-01	2016-01-28	14:05:00	DeKUWC	-0.38812	36.9578	1771
6-2016-01-28-14-10-01	2016-01-28	14:10:00	DeKUWC	-0.38812	36.9578	1771
6-2016-01-28-14-15-01	2016-01-28	14:15:00	DeKUWC	-0.38812	36.9578	1771
6-2016-01-28-14-20-01	2016-01-28	14:20:00	DeKUWC	-0.38812	36.9578	1771
6-2016-01-28-14-25-01	2016-01-28	14:25:00	DeKUWC	-0.38812	36.9578	1771
6-2016-01-28-14-30-02	2016-01-28	14:30:00	DeKUWC	-0.38812	36.9578	1771
6-2016-01-28-14-35-01	2016-01-28	14:35:00	DeKUWC	-0.38812	36.9578	1771
6-2016-01-28-14-40-01	2016-01-28	14:40:00	DeKUWC	-0.38812	36.9578	1771
6-2016-01-28-14-45-01	2016-01-28	14:45:00	DeKUWC	-0.38812	36.9578	1771
6-2016-01-28-14-50-01	2016-01-28	14:50:00	DeKUWC	-0.38812	36.9578	1771
6-2016-01-28-14-55-01	2016-01-28	14:55:00	DeKUWC	-0.38812	36.9578	1771
6-2016-01-28-15-00-01	2016-01-28	15:00:00	DeKUWC	-0.38812	36.9578	1771
6-2016-01-28-15-05-01	2016-01-28	15:05:00	DeKUWC	-0.38812	36.9578	1771		YWGR	Engine noise
6-2016-01-28-15-10-01	2016-01-28	15:10:00	DeKUWC	-0.38812	36.9578	1771		YWGR;BBPU;MYWA;YRTI	Faint sound similar to a Robin-Chat
6-2016-01-28-15-15-01	2016-01-28	15:15:00	DeKUWC	-0.38812	36.9578	1771
6-2016-01-28-15-20-01	2016-01-28	15:20:00	DeKUWC	-0.38812	36.9578	1771
6-2016-01-28-15-25-01	2016-01-28	15:25:00	DeKUWC	-0.38812	36.9578	1771
6-2016-01-28-15-30-01	2016-01-28	15:30:00	DeKUWC	-0.38812	36.9578	1771
6-2016-01-28-15-35-01	2016-01-28	15:35:00	DeKUWC	-0.38812	36.9578	1771
6-2016-01-28-15-40-01	2016-01-28	15:40:00	DeKUWC	-0.38812	36.9578	1771
6-2016-01-28-15-45-01	2016-01-28	15:45:00	DeKUWC	-0.38812	36.9578	1771
6-2016-01-28-15-50-01	2016-01-28	15:50:00	DeKUWC	-0.38812	36.9578	1771		TRBO;YWGR;BHOR
6-2016-01-28-15-55-02	2016-01-28	15:55:00	DeKUWC	-0.38812	36.9578	1771
6-2016-01-28-16-00-01	2016-01-28	16:00:00	DeKUWC	-0.38812	36.9578	1771
6-2016-01-28-16-05-01	2016-01-28	16:05:00	DeKUWC	-0.38812	36.9578	1771
6-2016-01-28-16-10-01	2016-01-28	16:10:00	DeKUWC	-0.38812	36.9578	1771	GBCA	TRBO;TADO	Engine noise
6-2016-01-28-16-15-01	2016-01-28	16:15:00	DeKUWC	-0.38812	36.9578	1771
6-2016-01-28-16-20-01	2016-01-28	16:20:00	DeKUWC	-0.38812	36.9578	1771
6-2016-01-28-16-25-01	2016-01-28	16:25:00	DeKUWC	-0.38812	36.9578	1771		YWGR;BBPU;TRBO	Insect noise
6-2016-01-28-16-30-01	2016-01-28	16:30:00	DeKUWC	-0.38812	36.9578	1771
6-2016-01-28-16-35-01	2016-01-28	16:35:00	DeKUWC	-0.38812	36.9578	1771
6-2016-01-28-16-40-01	2016-01-28	16:40:00	DeKUWC	-0.38812	36.9578	1771
6-2016-01-28-16-45-01	2016-01-28	16:45:00	DeKUWC	-0.38812	36.9578	1771
6-2016-01-28-16-50-01	2016-01-28	16:50:00	DeKUWC	-0.38812	36.9578	1771
6-2016-01-28-16-55-01	2016-01-28	16:55:00	DeKUWC	-0.38812	36.9578	1771
6-2016-01-28-17-00-01	2016-01-28	17:00:00	DeKUWC	-0.38812	36.9578	1771
6-2016-01-28-17-05-01	2016-01-28	17:05:00	DeKUWC	-0.38812	36.9578	1771
6-2016-01-28-17-10-01	2016-01-28	17:10:00	DeKUWC	-0.38812	36.9578	1771
6-2016-01-28-17-15-01	2016-01-28	17:15:00	DeKUWC	-0.38812	36.9578	1771
6-2016-01-28-17-20-01	2016-01-28	17:20:00	DeKUWC	-0.38812	36.9578	1771		YWGR;BBPU;OLTH;COBU
6-2016-01-28-17-25-01	2016-01-28	17:25:00	DeKUWC	-0.38812	36.9578	1771
6-2016-01-28-17-30-01	2016-01-28	17:30:00	DeKUWC	-0.38812	36.9578	1771
6-2016-01-28-17-35-01	2016-01-28	17:35:00	DeKUWC	-0.38812	36.9578	1771
6-2016-01-28-17-40-01	2016-01-28	17:40:00	DeKUWC	-0.38812	36.9578	1771	GBCA;RURC		Engine noise
6-2016-01-28-17-45-01	2016-01-28	17:45:00	DeKUWC	-0.38812	36.9578	1771
6-2016-01-28-17-50-01	2016-01-28	17:50:00	DeKUWC	-0.38812	36.9578	1771
6-2016-01-28-17-55-01	2016-01-28	17:55:00	DeKUWC	-0.38812	36.9578	1771
6-2016-01-28-18-00-01	2016-01-28	18:00:00	DeKUWC	-0.38812	36.9578	1771
6-2016-01-28-18-05-01	2016-01-28	18:05:00	DeKUWC	-0.38812	36.9578	1771		YWGR	A Robin-Chat mimicking RCCU; People and music; Engine noise
6-2016-01-28-18-10-01	2016-01-28	18:10:00	DeKUWC	-0.38812	36.9578	1771	GBCA;HATU	BBPU;YWGR;TRBO	Insect noise;Engine noise
6-2016-01-28-18-15-02	2016-01-28	18:15:00	DeKUWC	-0.38812	36.9578	1771
6-2016-01-28-18-20-01	2016-01-28	18:20:00	DeKUWC	-0.38812	36.9578	1771
6-2016-01-28-18-25-01	2016-01-28	18:25:00	DeKUWC	-0.38812	36.9578	1771
6-2016-01-28-18-30-01	2016-01-28	18:30:00	DeKUWC	-0.38812	36.9578	1771
6-2016-01-28-18-35-01	2016-01-28	18:35:00	DeKUWC	-0.38812	36.9578	1771
6-2016-01-28-18-40-01	2016-01-28	18:40:00	DeKUWC	-0.38812	36.9578	1771
6-2016-01-28-18-45-01	2016-01-28	18:45:00	DeKUWC	-0.38812	36.9578	1771	RCCU		Engine noise
6-2016-01-28-18-50-01	2016-01-28	18:50:00	DeKUWC	-0.38812	36.9578	1771
6-2016-01-28-18-55-01	2016-01-28	18:55:00	DeKUWC	-0.38812	36.9578	1771
6-2016-01-28-19-00-01	2016-01-28	19:00:00	DeKUWC	-0.38812	36.9578	1771
6-2016-01-28-19-05-01	2016-01-28	19:05:00	DeKUWC	-0.38812	36.9578	1771
6-2016-01-28-19-10-02	2016-01-28	19:10:00	DeKUWC	-0.38812	36.9578	1771
6-2016-01-28-19-15-02	2016-01-28	19:15:00	DeKUWC	-0.38812	36.9578	1771
6-2016-01-28-19-20-01	2016-01-28	19:20:00	DeKUWC	-0.38812	36.9578	1771
6-2016-01-28-19-25-01	2016-01-28	19:25:00	DeKUWC	-0.38812	36.9578	1771
6-2016-01-28-19-30-01	2016-01-28	19:30:00	DeKUWC	-0.38812	36.9578	1771
6-2016-01-28-19-35-01	2016-01-28	19:35:00	DeKUWC	-0.38812	36.9578	1771
6-2016-01-28-19-40-01	2016-01-28	19:40:00	DeKUWC	-0.38812	36.9578	1771
6-2016-01-28-19-45-01	2016-01-28	19:45:00	DeKUWC	-0.38812	36.9578	1771
6-2016-01-28-19-50-01	2016-01-28	19:50:00	DeKUWC	-0.38812	36.9578	1771
6-2016-01-28-19-55-01	2016-01-28	19:55:00	DeKUWC	-0.38812	36.9578	1771
6-2016-01-28-20-00-01	2016-01-28	20:00:00	DeKUWC	-0.38812	36.9578	1771
6-2016-01-28-20-05-01	2016-01-28	20:05:00	DeKUWC	-0.38812	36.9578	1771
6-2016-01-28-20-10-02	2016-01-28	20:10:00	DeKUWC	-0.38812	36.9578	1771
6-2016-01-28-20-15-01	2016-01-28	20:15:00	DeKUWC	-0.38812	36.9578	1771
6-2016-01-28-20-20-01	2016-01-28	20:20:00	DeKUWC	-0.38812	36.9578	1771
6-2016-01-28-20-25-01	2016-01-28	20:25:00	DeKUWC	-0.38812	36.9578	1771
6-2016-01-28-20-30-01	2016-01-28	20:30:00	DeKUWC	-0.38812	36.9578	1771
6-2016-01-28-20-35-01	2016-01-28	20:35:00	DeKUWC	-0.38812	36.9578	1771
6-2016-01-28-20-40-01	2016-01-28	20:40:00	DeKUWC	-0.38812	36.9578	1771
6-2016-01-28-20-45-01	2016-01-28	20:45:00	DeKUWC	-0.38812	36.9578	1771
6-2016-01-28-20-50-01	2016-01-28	20:50:00	DeKUWC	-0.38812	36.9578	1771
6-2016-01-28-20-55-01	2016-01-28	20:55:00	DeKUWC	-0.38812	36.9578	1771
6-2016-01-28-21-00-01	2016-01-28	21:00:00	DeKUWC	-0.38812	36.9578	1771
6-2016-01-28-21-05-02	2016-01-28	21:05:00	DeKUWC	-0.38812	36.9578	1771
6-2016-01-28-21-10-01	2016-01-28	21:10:00	DeKUWC	-0.38812	36.9578	1771
6-2016-01-28-21-15-01	2016-01-28	21:15:00	DeKUWC	-0.38812	36.9578	1771
6-2016-01-28-21-20-01	2016-01-28	21:20:00	DeKUWC	-0.38812	36.9578	1771
6-2016-01-28-21-25-01	2016-01-28	21:25:00	DeKUWC	-0.38812	36.9578	1771
6-2016-01-28-21-30-01	2016-01-28	21:30:00	DeKUWC	-0.38812	36.9578	1771
6-2016-01-28-21-35-01	2016-01-28	21:35:00	DeKUWC	-0.38812	36.9578	1771
6-2016-01-28-21-40-01	2016-01-28	21:40:00	DeKUWC	-0.38812	36.9578	1771
6-2016-01-28-21-45-01	2016-01-28	21:45:00	DeKUWC	-0.38812	36.9578	1771
6-2016-01-28-21-50-01	2016-01-28	21:50:00	DeKUWC	-0.38812	36.9578	1771
6-2016-01-28-21-55-01	2016-01-28	21:55:00	DeKUWC	-0.38812	36.9578	1771
6-2016-01-28-22-00-01	2016-01-28	22:00:00	DeKUWC	-0.38812	36.9578	1771
6-2016-01-28-22-05-02	2016-01-28	22:05:00	DeKUWC	-0.38812	36.9578	1771
6-2016-01-28-22-10-01	2016-01-28	22:10:00	DeKUWC	-0.38812	36.9578	1771
6-2016-01-28-22-15-01	2016-01-28	22:15:00	DeKUWC	-0.38812	36.9578	1771
6-2016-01-28-22-20-01	2016-01-28	22:20:00	DeKUWC	-0.38812	36.9578	1771
6-2016-01-28-22-25-01	2016-01-28	22:25:00	DeKUWC	-0.38812	36.9578	1771
6-2016-01-28-22-30-01	2016-01-28	22:30:00	DeKUWC	-0.38812	36.9578	1771
6-2016-01-28-22-35-01	2016-01-28	22:35:00	DeKUWC	-0.38812	36.9578	1771
6-2016-01-28-22-40-01	2016-01-28	22:40:00	DeKUWC	-0.38812	36.9578	1771
6-2016-01-28-22-45-01	2016-01-28	22:45:00	DeKUWC	-0.38812	36.9578	1771
6-2016-01-28-22-50-01	2016-01-28	22:50:00	DeKUWC	-0.38812	36.9578	1771
6-2016-01-28-22-55-01	2016-01-28	22:55:00	DeKUWC	-0.38812	36.9578	1771
6-2016-01-28-23-00-02	2016-01-28	23:00:00	DeKUWC	-0.38812	36.9578	1771
6-2016-01-28-23-05-01	2016-01-28	23:05:00	DeKUWC	-0.38812	36.9578	1771
6-2016-01-28-23-10-01	2016-01-28	23:10:00	DeKUWC	-0.38812	36.9578	1771
6-2016-01-28-23-15-01	2016-01-28	23:15:00	DeKUWC	-0.38812	36.9578	1771
6-2016-01-28-23-20-01	2016-01-28	23:20:00	DeKUWC	-0.38812	36.9578	1771
6-2016-01-28-23-25-01	2016-01-28	23:25:00	DeKUWC	-0.38812	36.9578	1771
6-2016-01-28-23-30-01	2016-01-28	23:30:00	DeKUWC	-0.38812	36.9578	1771
6-2016-01-28-23-35-01	2016-01-28	23:35:00	DeKUWC	-0.38812	36.9578	1771
6-2016-01-28-23-40-01	2016-01-28	23:40:00	DeKUWC	-0.38812	36.9578	1771
6-2016-01-28-23-45-01	2016-01-28	23:45:00	DeKUWC	-0.38812	36.9578	1771
6-2016-01-28-23-50-01	2016-01-28	23:50:00	DeKUWC	-0.38812	36.9578	1771
6-2016-01-28-23-55-02	2016-01-28	23:55:00	DeKUWC	-0.38812	36.9578	1771
6-2016-01-29-00-00-01	2016-01-29	00:00:00	DeKUWC	-0.38812	36.9578	1771
6-2016-01-29-00-05-01	2016-01-29	00:05:00	DeKUWC	-0.38812	36.9578	1771
6-2016-01-29-00-10-01	2016-01-29	00:10:00	DeKUWC	-0.38812	36.9578	1771
6-2016-01-29-00-15-01	2016-01-29	00:15:00	DeKUWC	-0.38812	36.9578	1771
6-2016-01-29-00-20-01	2016-01-29	00:20:00	DeKUWC	-0.38812	36.9578	1771
6-2016-01-29-00-25-01	2016-01-29	00:25:00	DeKUWC	-0.38812	36.9578	1771
6-2016-01-29-00-30-01	2016-01-29	00:30:00	DeKUWC	-0.38812	36.9578	1771
6-2016-01-29-00-35-01	2016-01-29	00:35:00	DeKUWC	-0.38812	36.9578	1771
6-2016-01-29-00-40-01	2016-01-29	00:40:00	DeKUWC	-0.38812	36.9578	1771
6-2016-01-29-00-45-01	2016-01-29	00:45:00	DeKUWC	-0.38812	36.9578	1771
6-2016-01-29-00-50-02	2016-01-29	00:50:00	DeKUWC	-0.38812	36.9578	1771
6-2016-01-29-00-55-02	2016-01-29	00:55:00	DeKUWC	-0.38812	36.9578	1771
6-2016-01-29-01-00-01	2016-01-29	01:00:00	DeKUWC	-0.38812	36.9578	1771
6-2016-01-29-01-05-01	2016-01-29	01:05:00	DeKUWC	-0.38812	36.9578	1771
6-2016-01-29-01-10-01	2016-01-29	01:10:00	DeKUWC	-0.38812	36.9578	1771
6-2016-01-29-01-15-01	2016-01-29	01:15:00	DeKUWC	-0.38812	36.9578	1771
6-2016-01-29-01-20-01	2016-01-29	01:20:00	DeKUWC	-0.38812	36.9578	1771
6-2016-01-29-01-25-01	2016-01-29	01:25:00	DeKUWC	-0.38812	36.9578	1771
6-2016-01-29-01-30-01	2016-01-29	01:30:00	DeKUWC	-0.38812	36.9578	1771
6-2016-01-29-01-35-01	2016-01-29	01:35:00	DeKUWC	-0.38812	36.9578	1771
6-2016-01-29-01-40-01	2016-01-29	01:40:00	DeKUWC	-0.38812	36.9578	1771
6-2016-01-29-01-45-01	2016-01-29	01:45:00	DeKUWC	-0.38812	36.9578	1771
6-2016-01-29-01-50-02	2016-01-29	01:50:00	DeKUWC	-0.38812	36.9578	1771
6-2016-01-29-01-55-01	2016-01-29	01:55:00	DeKUWC	-0.38812	36.9578	1771
6-2016-01-29-02-00-01	2016-01-29	02:00:00	DeKUWC	-0.38812	36.9578	1771
6-2016-01-29-02-05-01	2016-01-29	02:05:00	DeKUWC	-0.38812	36.9578	1771
6-2016-01-29-02-10-01	2016-01-29	02:10:00	DeKUWC	-0.38812	36.9578	1771
6-2016-01-29-02-15-01	2016-01-29	02:15:00	DeKUWC	-0.38812	36.9578	1771
6-2016-01-29-02-20-01	2016-01-29	02:20:00	DeKUWC	-0.38812	36.9578	1771
6-2016-01-29-02-25-01	2016-01-29	02:25:00	DeKUWC	-0.38812	36.9578	1771
6-2016-01-29-02-30-01	2016-01-29	02:30:00	DeKUWC	-0.38812	36.9578	1771
6-2016-01-29-02-35-01	2016-01-29	02:35:00	DeKUWC	-0.38812	36.9578	1771
6-2016-01-29-02-40-01	2016-01-29	02:40:00	DeKUWC	-0.38812	36.9578	1771
6-2016-01-29-02-45-02	2016-01-29	02:45:00	DeKUWC	-0.38812	36.9578	1771
6-2016-01-29-02-50-01	2016-01-29	02:50:00	DeKUWC	-0.38812	36.9578	1771
6-2016-01-29-02-55-01	2016-01-29	02:55:00	DeKUWC	-0.38812	36.9578	1771
6-2016-01-29-03-00-01	2016-01-29	03:00:00	DeKUWC	-0.38812	36.9578	1771
6-2016-01-29-03-05-01	2016-01-29	03:05:00	DeKUWC	-0.38812	36.9578	1771
6-2016-01-29-03-10-01	2016-01-29	03:10:00	DeKUWC	-0.38812	36.9578	1771
6-2016-01-29-03-15-01	2016-01-29	03:15:00	DeKUWC	-0.38812	36.9578	1771
6-2016-01-29-03-20-01	2016-01-29	03:20:00	DeKUWC	-0.38812	36.9578	1771
6-2016-01-29-03-25-01	2016-01-29	03:25:00	DeKUWC	-0.38812	36.9578	1771
6-2016-01-29-03-30-01	2016-01-29	03:30:00	DeKUWC	-0.38812	36.9578	1771
6-2016-01-29-03-35-01	2016-01-29	03:35:00	DeKUWC	-0.38812	36.9578	1771
6-2016-01-29-03-40-02	2016-01-29	03:40:00	DeKUWC	-0.38812	36.9578	1771
6-2016-01-29-03-45-02	2016-01-29	03:45:00	DeKUWC	-0.38812	36.9578	1771
6-2016-01-29-03-50-01	2016-01-29	03:50:00	DeKUWC	-0.38812	36.9578	1771
6-2016-01-29-03-55-01	2016-01-29	03:55:00	DeKUWC	-0.38812	36.9578	1771
6-2016-01-29-04-00-01	2016-01-29	04:00:00	DeKUWC	-0.38812	36.9578	1771
6-2016-01-29-04-05-01	2016-01-29	04:05:00	DeKUWC	-0.38812	36.9578	1771
6-2016-01-29-04-10-01	2016-01-29	04:10:00	DeKUWC	-0.38812	36.9578	1771
6-2016-01-29-04-15-01	2016-01-29	04:15:00	DeKUWC	-0.38812	36.9578	1771
6-2016-01-29-04-20-01	2016-01-29	04:20:00	DeKUWC	-0.38812	36.9578	1771
6-2016-01-29-04-25-01	2016-01-29	04:25:00	DeKUWC	-0.38812	36.9578	1771
6-2016-01-29-04-30-01	2016-01-29	04:30:00	DeKUWC	-0.38812	36.9578	1771
6-2016-01-29-04-35-01	2016-01-29	04:35:00	DeKUWC	-0.38812	36.9578	1771
6-2016-01-29-04-40-02	2016-01-29	04:40:00	DeKUWC	-0.38812	36.9578	1771
6-2016-01-29-04-45-01	2016-01-29	04:45:00	DeKUWC	-0.38812	36.9578	1771
6-2016-01-29-04-50-01	2016-01-29	04:50:00	DeKUWC	-0.38812	36.9578	1771
6-2016-01-29-04-55-01	2016-01-29	04:55:00	DeKUWC	-0.38812	36.9578	1771
6-2016-01-29-05-00-01	2016-01-29	05:00:00	DeKUWC	-0.38812	36.9578	1771
6-2016-01-29-05-05-01	2016-01-29	05:05:00	DeKUWC	-0.38812	36.9578	1771
6-2016-01-29-05-10-01	2016-01-29	05:10:00	DeKUWC	-0.38812	36.9578	1771
6-2016-01-29-05-15-01	2016-01-29	05:15:00	DeKUWC	-0.38812	36.9578	1771
6-2016-01-29-05-20-01	2016-01-29	05:20:00	DeKUWC	-0.38812	36.9578	1771
6-2016-01-29-05-25-01	2016-01-29	05:25:00	DeKUWC	-0.38812	36.9578	1771
6-2016-01-29-05-30-01	2016-01-29	05:30:00	DeKUWC	-0.38812	36.9578	1771
6-2016-01-29-05-35-02	2016-01-29	05:35:00	DeKUWC	-0.38812	36.9578	1771
6-2016-01-29-05-40-01	2016-01-29	05:40:00	DeKUWC	-0.38812	36.9578	1771
6-2016-01-29-05-45-01	2016-01-29	05:45:00	DeKUWC	-0.38812	36.9578	1771
6-2016-01-29-05-50-01	2016-01-29	05:50:00	DeKUWC	-0.38812	36.9578	1771
6-2016-01-29-05-55-01	2016-01-29	05:55:00	DeKUWC	-0.38812	36.9578	1771
6-2016-01-29-06-00-01	2016-01-29	06:00:00	DeKUWC	-0.38812	36.9578	1771
6-2016-01-29-06-05-01	2016-01-29	06:05:00	DeKUWC	-0.38812	36.9578	1771	ADFL	YWGR	Insect noise; Engine noise
6-2016-01-29-06-10-01	2016-01-29	06:10:00	DeKUWC	-0.38812	36.9578	1771
6-2016-01-29-06-15-01	2016-01-29	06:15:00	DeKUWC	-0.38812	36.9578	1771
6-2016-01-29-06-20-01	2016-01-29	06:20:00	DeKUWC	-0.38812	36.9578	1771
6-2016-01-29-06-25-01	2016-01-29	06:25:00	DeKUWC	-0.38812	36.9578	1771
6-2016-01-29-06-30-01	2016-01-29	06:30:00	DeKUWC	-0.38812	36.9578	1771
6-2016-01-29-06-35-01	2016-01-29	06:35:00	DeKUWC	-0.38812	36.9578	1771	GBCA	YWGR;COSU;ESWD	Engine noise
6-2016-01-29-06-40-01	2016-01-29	06:40:00	DeKUWC	-0.38812	36.9578	1771
6-2016-01-29-06-45-02	2016-01-29	06:45:00	DeKUWC	-0.38812	36.9578	1771
6-2016-01-29-06-50-01	2016-01-29	06:50:00	DeKUWC	-0.38812	36.9578	1771
6-2016-01-29-06-55-01	2016-01-29	06:55:00	DeKUWC	-0.38812	36.9578	1771
6-2016-01-29-07-00-01	2016-01-29	07:00:00	DeKUWC	-0.38812	36.9578	1771
6-2016-01-29-07-05-01	2016-01-29	07:05:00	DeKUWC	-0.38812	36.9578	1771
6-2016-01-29-07-10-01	2016-01-29	07:10:00	DeKUWC	-0.38812	36.9578	1771
6-2016-01-29-07-15-01	2016-01-29	07:15:00	DeKUWC	-0.38812	36.9578	1771
6-2016-01-29-07-20-01	2016-01-29	07:20:00	DeKUWC	-0.38812	36.9578	1771		TRBO;YWGR	Engine noise;Possible Chat
6-2016-01-29-07-25-01	2016-01-29	07:25:00	DeKUWC	-0.38812	36.9578	1771	GBCA	OLTH;YWGR;BHOR
6-2016-01-29-07-30-01	2016-01-29	07:30:00	DeKUWC	-0.38812	36.9578	1771
6-2016-01-29-07-35-01	2016-01-29	07:35:00	DeKUWC	-0.38812	36.9578	1771
6-2016-01-29-07-40-01	2016-01-29	07:40:00	DeKUWC	-0.38812	36.9578	1771
6-2016-01-29-07-45-01	2016-01-29	07:45:00	DeKUWC	-0.38812	36.9578	1771
6-2016-01-29-07-50-01	2016-01-29	07:50:00	DeKUWC	-0.38812	36.9578	1771
6-2016-01-29-07-55-01	2016-01-29	07:55:00	DeKUWC	-0.38812	36.9578	1771
6-2016-01-29-08-00-01	2016-01-29	08:00:00	DeKUWC	-0.38812	36.9578	1771
6-2016-01-29-08-05-01	2016-01-29	08:05:00	DeKUWC	-0.38812	36.9578	1771
6-2016-01-29-08-10-02	2016-01-29	08:10:00	DeKUWC	-0.38812	36.9578	1771	OLTH;GBCA	YWGR	Engine noise
6-2016-01-29-08-15-01	2016-01-29	08:15:00	DeKUWC	-0.38812	36.9578	1771
6-2016-01-29-08-20-01	2016-01-29	08:20:00	DeKUWC	-0.38812	36.9578	1771
6-2016-01-29-08-25-01	2016-01-29	08:25:00	DeKUWC	-0.38812	36.9578	1771
6-2016-01-29-08-30-01	2016-01-29	08:30:00	DeKUWC	-0.38812	36.9578	1771	TRBO;GBCA		Engine noise
6-2016-01-29-08-35-01	2016-01-29	08:35:00	DeKUWC	-0.38812	36.9578	1771
6-2016-01-29-08-40-01	2016-01-29	08:40:00	DeKUWC	-0.38812	36.9578	1771	TRBO;GBCA
6-2016-01-29-08-45-01	2016-01-29	08:45:00	DeKUWC	-0.38812	36.9578	1771
6-2016-01-29-08-50-01	2016-01-29	08:50:00	DeKUWC	-0.38812	36.9578	1771
6-2016-01-29-08-55-01	2016-01-29	08:55:00	DeKUWC	-0.38812	36.9578	1771
6-2016-01-29-09-00-01	2016-01-29	09:00:00	DeKUWC	-0.38812	36.9578	1771
6-2016-01-29-09-05-01	2016-01-29	09:05:00	DeKUWC	-0.38812	36.9578	1771
6-2016-01-29-09-10-01	2016-01-29	09:10:00	DeKUWC	-0.38812	36.9578	1771
6-2016-01-29-09-15-01	2016-01-29	09:15:00	DeKUWC	-0.38812	36.9578	1771	CARC;GBCA	TRBO
6-2016-01-29-09-20-02	2016-01-29	09:20:00	DeKUWC	-0.38812	36.9578	1771	GBCA	TRBO
6-2016-01-29-09-25-02	2016-01-29	09:25:00	DeKUWC	-0.38812	36.9578	1771
6-2016-01-29-09-30-01	2016-01-29	09:30:00	DeKUWC	-0.38812	36.9578	1771
6-2016-01-29-09-35-01	2016-01-29	09:35:00	DeKUWC	-0.38812	36.9578	1771
6-2016-01-29-09-40-01	2016-01-29	09:40:00	DeKUWC	-0.38812	36.9578	1771
6-2016-01-29-09-45-01	2016-01-29	09:45:00	DeKUWC	-0.38812	36.9578	1771
6-2016-01-29-09-50-01	2016-01-29	09:50:00	DeKUWC	-0.38812	36.9578	1771
6-2016-01-29-09-55-01	2016-01-29	09:55:00	DeKUWC	-0.38812	36.9578	1771
6-2016-01-29-10-00-01	2016-01-29	10:00:00	DeKUWC	-0.38812	36.9578	1771
6-2016-01-29-10-05-01	2016-01-29	10:05:00	DeKUWC	-0.38812	36.9578	1771	BBPU	GBCA
6-2016-01-29-10-10-01	2016-01-29	10:10:00	DeKUWC	-0.38812	36.9578	1771	YRTI;TRBO	SCHO
6-2016-01-29-10-15-01	2016-01-29	10:15:00	DeKUWC	-0.38812	36.9578	1771	SCHO	TRBO
6-2016-01-29-10-20-01	2016-01-29	10:20:00	DeKUWC	-0.38812	36.9578	1771
6-2016-01-29-10-25-01	2016-01-29	10:25:00	DeKUWC	-0.38812	36.9578	1771
6-2016-01-29-10-30-01	2016-01-29	10:30:00	DeKUWC	-0.38812	36.9578	1771
6-2016-01-29-10-35-01	2016-01-29	10:35:00	DeKUWC	-0.38812	36.9578	1771
6-2016-01-29-10-40-01	2016-01-29	10:40:00	DeKUWC	-0.38812	36.9578	1771
6-2016-01-29-10-45-02	2016-01-29	10:45:00	DeKUWC	-0.38812	36.9578	1771
6-2016-01-29-10-50-02	2016-01-29	10:50:00	DeKUWC	-0.38812	36.9578	1771
6-2016-01-29-10-55-01	2016-01-29	10:55:00	DeKUWC	-0.38812	36.9578	1771
6-2016-01-29-11-00-01	2016-01-29	11:00:00	DeKUWC	-0.38812	36.9578	1771	YRTI	TRBO;YWGR	Engine noise
6-2016-01-29-11-05-01	2016-01-29	11:05:00	DeKUWC	-0.38812	36.9578	1771
6-2016-01-29-11-10-01	2016-01-29	11:10:00	DeKUWC	-0.38812	36.9578	1771
6-2016-01-29-11-15-01	2016-01-29	11:15:00	DeKUWC	-0.38812	36.9578	1771	TRBO	YWGR	Engine noise
6-2016-01-29-11-20-01	2016-01-29	11:20:00	DeKUWC	-0.38812	36.9578	1771
6-2016-01-29-11-25-01	2016-01-29	11:25:00	DeKUWC	-0.38812	36.9578	1771
6-2016-01-29-11-30-01	2016-01-29	11:30:00	DeKUWC	-0.38812	36.9578	1771
6-2016-01-29-11-35-01	2016-01-29	11:35:00	DeKUWC	-0.38812	36.9578	1771
6-2016-01-29-11-40-01	2016-01-29	11:40:00	DeKUWC	-0.38812	36.9578	1771
6-2016-01-29-11-45-01	2016-01-29	11:45:00	DeKUWC	-0.38812	36.9578	1771
6-2016-01-29-11-50-01	2016-01-29	11:50:00	DeKUWC	-0.38812	36.9578	1771
6-2016-01-29-11-55-01	2016-01-29	11:55:00	DeKUWC	-0.38812	36.9578	1771
6-2016-01-29-12-00-01	2016-01-29	12:00:00	DeKUWC	-0.38812	36.9578	1771
6-2016-01-29-12-05-01	2016-01-29	12:05:00	DeKUWC	-0.38812	36.9578	1771
6-2016-01-29-12-10-02	2016-01-29	12:10:00	DeKUWC	-0.38812	36.9578	1771
6-2016-01-29-12-15-02	2016-01-29	12:15:00	DeKUWC	-0.38812	36.9578	1771
6-2016-01-29-12-20-01	2016-01-29	12:20:00	DeKUWC	-0.38812	36.9578	1771
6-2016-01-29-12-25-01	2016-01-29	12:25:00	DeKUWC	-0.38812	36.9578	1771
6-2016-01-29-12-30-01	2016-01-29	12:30:00	DeKUWC	-0.38812	36.9578	1771
6-2016-01-29-12-35-01	2016-01-29	12:35:00	DeKUWC	-0.38812	36.9578	1771	YRTI;BBPU;TRBO
6-2016-01-29-12-40-01	2016-01-29	12:40:00	DeKUWC	-0.38812	36.9578	1771	TRBO;YRTI;BBPU
6-2016-01-29-12-45-01	2016-01-29	12:45:00	DeKUWC	-0.38812	36.9578	1771
6-2016-01-29-12-50-01	2016-01-29	12:50:00	DeKUWC	-0.38812	36.9578	1771
6-2016-01-29-12-55-01	2016-01-29	12:55:00	DeKUWC	-0.38812	36.9578	1771			Raindrops
6-2016-01-29-13-00-01	2016-01-29	13:00:00	DeKUWC	-0.38812	36.9578	1771

## Sheet: 7
Filename	Date	Time	Location	Latitude	Longitude	Elevation	Foreground Species	Background Species	Remarks
7-2016-01-28-09-45-01	2016-01-28	09:45:00	DeKUWC	-0.387983	36.9569	1800
7-2016-01-28-09-50-01	2016-01-28	09:50:00	DeKUWC	-0.387983	36.9569	1800
7-2016-01-28-09-55-01	2016-01-28	09:55:00	DeKUWC	-0.387983	36.9569	1800
7-2016-01-28-10-00-01	2016-01-28	10:00:00	DeKUWC	-0.387983	36.9569	1800
7-2016-01-28-10-05-01	2016-01-28	10:05:00	DeKUWC	-0.387983	36.9569	1800
7-2016-01-28-10-10-01	2016-01-28	10:10:00	DeKUWC	-0.387983	36.9569	1800
7-2016-01-28-10-15-01	2016-01-28	10:15:00	DeKUWC	-0.387983	36.9569	1800
7-2016-01-28-10-20-01	2016-01-28	10:20:00	DeKUWC	-0.387983	36.9569	1800
7-2016-01-28-10-25-01	2016-01-28	10:25:00	DeKUWC	-0.387983	36.9569	1800
7-2016-01-28-10-30-01	2016-01-28	10:30:00	DeKUWC	-0.387983	36.9569	1800
7-2016-01-28-10-35-01	2016-01-28	10:35:00	DeKUWC	-0.387983	36.9569	1800
7-2016-01-28-10-40-01	2016-01-28	10:40:00	DeKUWC	-0.387983	36.9569	1800
7-2016-01-28-10-45-01	2016-01-28	10:45:00	DeKUWC	-0.387983	36.9569	1800
7-2016-01-28-10-50-01	2016-01-28	10:50:00	DeKUWC	-0.387983	36.9569	1800
7-2016-01-28-10-55-01	2016-01-28	10:55:00	DeKUWC	-0.387983	36.9569	1800
7-2016-01-28-11-00-01	2016-01-28	11:00:00	DeKUWC	-0.387983	36.9569	1800
7-2016-01-28-11-05-01	2016-01-28	11:05:00	DeKUWC	-0.387983	36.9569	1800
7-2016-01-28-11-10-01	2016-01-28	11:10:00	DeKUWC	-0.387983	36.9569	1800
7-2016-01-28-11-15-01	2016-01-28	11:15:00	DeKUWC	-0.387983	36.9569	1800
7-2016-01-28-11-20-01	2016-01-28	11:20:00	DeKUWC	-0.387983	36.9569	1800
7-2016-01-28-11-25-01	2016-01-28	11:25:00	DeKUWC	-0.387983	36.9569	1800
7-2016-01-28-11-30-01	2016-01-28	11:30:00	DeKUWC	-0.387983	36.9569	1800
7-2016-01-28-11-35-01	2016-01-28	11:35:00	DeKUWC	-0.387983	36.9569	1800
7-2016-01-28-11-40-02	2016-01-28	11:40:00	DeKUWC	-0.387983	36.9569	1800
7-2016-01-28-11-45-01	2016-01-28	11:45:00	DeKUWC	-0.387983	36.9569	1800
7-2016-01-28-11-50-01	2016-01-28	11:50:00	DeKUWC	-0.387983	36.9569	1800
7-2016-01-28-11-55-01	2016-01-28	11:55:00	DeKUWC	-0.387983	36.9569	1800
7-2016-01-28-12-00-01	2016-01-28	12:00:00	DeKUWC	-0.387983	36.9569	1800
7-2016-01-28-12-05-01	2016-01-28	12:05:00	DeKUWC	-0.387983	36.9569	1800
7-2016-01-28-12-10-01	2016-01-28	12:10:00	DeKUWC	-0.387983	36.9569	1800
7-2016-01-28-12-15-01	2016-01-28	12:15:00	DeKUWC	-0.387983	36.9569	1800
7-2016-01-28-12-20-01	2016-01-28	12:20:00	DeKUWC	-0.387983	36.9569	1800
7-2016-01-28-12-25-01	2016-01-28	12:25:00	DeKUWC	-0.387983	36.9569	1800
7-2016-01-28-12-30-01	2016-01-28	12:30:00	DeKUWC	-0.387983	36.9569	1800
7-2016-01-28-12-35-01	2016-01-28	12:35:00	DeKUWC	-0.387983	36.9569	1800
7-2016-01-28-12-40-01	2016-01-28	12:40:00	DeKUWC	-0.387983	36.9569	1800
7-2016-01-28-12-45-01	2016-01-28	12:45:00	DeKUWC	-0.387983	36.9569	1800
7-2016-01-28-12-50-01	2016-01-28	12:50:00	DeKUWC	-0.387983	36.9569	1800
7-2016-01-28-12-55-01	2016-01-28	12:55:00	DeKUWC	-0.387983	36.9569	1800
7-2016-01-28-13-00-01	2016-01-28	13:00:00	DeKUWC	-0.387983	36.9569	1800
7-2016-01-28-13-05-02	2016-01-28	13:05:00	DeKUWC	-0.387983	36.9569	1800
7-2016-01-28-13-10-01	2016-01-28	13:10:00	DeKUWC	-0.387983	36.9569	1800
7-2016-01-28-13-15-01	2016-01-28	13:15:00	DeKUWC	-0.387983	36.9569	1800
7-2016-01-28-13-20-01	2016-01-28	13:20:00	DeKUWC	-0.387983	36.9569	1800
7-2016-01-28-13-25-01	2016-01-28	13:25:00	DeKUWC	-0.387983	36.9569	1800
7-2016-01-28-13-30-01	2016-01-28	13:30:00	DeKUWC	-0.387983	36.9569	1800
7-2016-01-28-13-35-01	2016-01-28	13:35:00	DeKUWC	-0.387983	36.9569	1800
7-2016-01-28-13-40-01	2016-01-28	13:40:00	DeKUWC	-0.387983	36.9569	1800
7-2016-01-28-13-45-01	2016-01-28	13:45:00	DeKUWC	-0.387983	36.9569	1800
7-2016-01-28-13-50-01	2016-01-28	13:50:00	DeKUWC	-0.387983	36.9569	1800
7-2016-01-28-13-55-01	2016-01-28	13:55:00	DeKUWC	-0.387983	36.9569	1800
7-2016-01-28-14-00-01	2016-01-28	14:00:00	DeKUWC	-0.387983	36.9569	1800
7-2016-01-28-14-05-01	2016-01-28	14:05:00	DeKUWC	-0.387983	36.9569	1800
7-2016-01-28-14-10-01	2016-01-28	14:10:00	DeKUWC	-0.387983	36.9569	1800
7-2016-01-28-14-15-01	2016-01-28	14:15:00	DeKUWC	-0.387983	36.9569	1800
7-2016-01-28-14-20-02	2016-01-28	14:20:00	DeKUWC	-0.387983	36.9569	1800
7-2016-01-28-14-25-01	2016-01-28	14:25:00	DeKUWC	-0.387983	36.9569	1800
7-2016-01-28-14-30-01	2016-01-28	14:30:00	DeKUWC	-0.387983	36.9569	1800
7-2016-01-28-14-35-01	2016-01-28	14:35:00	DeKUWC	-0.387983	36.9569	1800
7-2016-01-28-14-40-01	2016-01-28	14:40:00	DeKUWC	-0.387983	36.9569	1800
7-2016-01-28-14-45-01	2016-01-28	14:45:00	DeKUWC	-0.387983	36.9569	1800
7-2016-01-28-14-50-01	2016-01-28	14:50:00	DeKUWC	-0.387983	36.9569	1800
7-2016-01-28-14-55-01	2016-01-28	14:55:00	DeKUWC	-0.387983	36.9569	1800
7-2016-01-28-15-00-01	2016-01-28	15:00:00	DeKUWC	-0.387983	36.9569	1800
7-2016-01-28-15-05-01	2016-01-28	15:05:00	DeKUWC	-0.387983	36.9569	1800
7-2016-01-28-15-10-01	2016-01-28	15:10:00	DeKUWC	-0.387983	36.9569	1800
7-2016-01-28-15-15-01	2016-01-28	15:15:00	DeKUWC	-0.387983	36.9569	1800
7-2016-01-28-15-20-01	2016-01-28	15:20:00	DeKUWC	-0.387983	36.9569	1800
7-2016-01-28-15-25-01	2016-01-28	15:25:00	DeKUWC	-0.387983	36.9569	1800
7-2016-01-28-15-30-01	2016-01-28	15:30:00	DeKUWC	-0.387983	36.9569	1800
7-2016-01-28-15-35-01	2016-01-28	15:35:00	DeKUWC	-0.387983	36.9569	1800
7-2016-01-28-15-40-01	2016-01-28	15:40:00	DeKUWC	-0.387983	36.9569	1800
7-2016-01-28-15-45-02	2016-01-28	15:45:00	DeKUWC	-0.387983	36.9569	1800
7-2016-01-28-15-50-01	2016-01-28	15:50:00	DeKUWC	-0.387983	36.9569	1800		YWGR	Engine noise
7-2016-01-28-15-55-01	2016-01-28	15:55:00	DeKUWC	-0.387983	36.9569	1800		SCHO	Engine noise
7-2016-01-28-16-00-01	2016-01-28	16:00:00	DeKUWC	-0.387983	36.9569	1800
7-2016-01-28-16-05-01	2016-01-28	16:05:00	DeKUWC	-0.387983	36.9569	1800
7-2016-01-28-16-10-01	2016-01-28	16:10:00	DeKUWC	-0.387983	36.9569	1800
7-2016-01-28-16-15-01	2016-01-28	16:15:00	DeKUWC	-0.387983	36.9569	1800
7-2016-01-28-16-20-01	2016-01-28	16:20:00	DeKUWC	-0.387983	36.9569	1800
7-2016-01-28-16-25-01	2016-01-28	16:25:00	DeKUWC	-0.387983	36.9569	1800
7-2016-01-28-16-30-01	2016-01-28	16:30:00	DeKUWC	-0.387983	36.9569	1800
7-2016-01-28-16-35-01	2016-01-28	16:35:00	DeKUWC	-0.387983	36.9569	1800		YWGR;GBCA	Engine noise;Knocking sound
7-2016-01-28-16-40-01	2016-01-28	16:40:00	DeKUWC	-0.387983	36.9569	1800
7-2016-01-28-16-45-01	2016-01-28	16:45:00	DeKUWC	-0.387983	36.9569	1800
7-2016-01-28-16-50-01	2016-01-28	16:50:00	DeKUWC	-0.387983	36.9569	1800
7-2016-01-28-16-55-01	2016-01-28	16:55:00	DeKUWC	-0.387983	36.9569	1800
7-2016-01-28-17-00-01	2016-01-28	17:00:00	DeKUWC	-0.387983	36.9569	1800
7-2016-01-28-17-05-02	2016-01-28	17:05:00	DeKUWC	-0.387983	36.9569	1800
7-2016-01-28-17-10-02	2016-01-28	17:10:00	DeKUWC	-0.387983	36.9569	1800
7-2016-01-28-17-15-01	2016-01-28	17:15:00	DeKUWC	-0.387983	36.9569	1800
7-2016-01-28-17-20-01	2016-01-28	17:20:00	DeKUWC	-0.387983	36.9569	1800
7-2016-01-28-17-25-01	2016-01-28	17:25:00	DeKUWC	-0.387983	36.9569	1800
7-2016-01-28-17-30-01	2016-01-28	17:30:00	DeKUWC	-0.387983	36.9569	1800
7-2016-01-28-17-35-01	2016-01-28	17:35:00	DeKUWC	-0.387983	36.9569	1800
7-2016-01-28-17-40-01	2016-01-28	17:40:00	DeKUWC	-0.387983	36.9569	1800
7-2016-01-28-17-45-01	2016-01-28	17:45:00	DeKUWC	-0.387983	36.9569	1800
7-2016-01-28-17-50-01	2016-01-28	17:50:00	DeKUWC	-0.387983	36.9569	1800
7-2016-01-28-17-55-01	2016-01-28	17:55:00	DeKUWC	-0.387983	36.9569	1800
7-2016-01-28-18-00-01	2016-01-28	18:00:00	DeKUWC	-0.387983	36.9569	1800
7-2016-01-28-18-05-02	2016-01-28	18:05:00	DeKUWC	-0.387983	36.9569	1800
7-2016-01-28-18-10-01	2016-01-28	18:10:00	DeKUWC	-0.387983	36.9569	1800
7-2016-01-28-18-15-01	2016-01-28	18:15:00	DeKUWC	-0.387983	36.9569	1800
7-2016-01-28-18-20-01	2016-01-28	18:20:00	DeKUWC	-0.387983	36.9569	1800
7-2016-01-28-18-25-01	2016-01-28	18:25:00	DeKUWC	-0.387983	36.9569	1800
7-2016-01-28-18-30-01	2016-01-28	18:30:00	DeKUWC	-0.387983	36.9569	1800	RURC		Engine noise
7-2016-01-28-18-35-01	2016-01-28	18:35:00	DeKUWC	-0.387983	36.9569	1800
7-2016-01-28-18-40-01	2016-01-28	18:40:00	DeKUWC	-0.387983	36.9569	1800
7-2016-01-28-18-45-01	2016-01-28	18:45:00	DeKUWC	-0.387983	36.9569	1800
7-2016-01-28-18-50-01	2016-01-28	18:50:00	DeKUWC	-0.387983	36.9569	1800
7-2016-01-28-18-55-01	2016-01-28	18:55:00	DeKUWC	-0.387983	36.9569	1800
7-2016-01-28-19-00-02	2016-01-28	19:00:00	DeKUWC	-0.387983	36.9569	1800
7-2016-01-28-19-05-02	2016-01-28	19:05:00	DeKUWC	-0.387983	36.9569	1800
7-2016-01-28-19-10-01	2016-01-28	19:10:00	DeKUWC	-0.387983	36.9569	1800
7-2016-01-28-19-15-01	2016-01-28	19:15:00	DeKUWC	-0.387983	36.9569	1800
7-2016-01-28-19-20-01	2016-01-28	19:20:00	DeKUWC	-0.387983	36.9569	1800
7-2016-01-28-19-25-01	2016-01-28	19:25:00	DeKUWC	-0.387983	36.9569	1800
7-2016-01-28-19-30-01	2016-01-28	19:30:00	DeKUWC	-0.387983	36.9569	1800
7-2016-01-28-19-35-01	2016-01-28	19:35:00	DeKUWC	-0.387983	36.9569	1800
7-2016-01-28-19-40-01	2016-01-28	19:40:00	DeKUWC	-0.387983	36.9569	1800
7-2016-01-28-19-45-01	2016-01-28	19:45:00	DeKUWC	-0.387983	36.9569	1800
7-2016-01-28-19-50-01	2016-01-28	19:50:00	DeKUWC	-0.387983	36.9569	1800
7-2016-01-28-19-55-02	2016-01-28	19:55:00	DeKUWC	-0.387983	36.9569	1800
7-2016-01-28-20-00-02	2016-01-28	20:00:00	DeKUWC	-0.387983	36.9569	1800
7-2016-01-28-20-05-01	2016-01-28	20:05:00	DeKUWC	-0.387983	36.9569	1800
7-2016-01-28-20-10-01	2016-01-28	20:10:00	DeKUWC	-0.387983	36.9569	1800
7-2016-01-28-20-15-01	2016-01-28	20:15:00	DeKUWC	-0.387983	36.9569	1800
7-2016-01-28-20-20-01	2016-01-28	20:20:00	DeKUWC	-0.387983	36.9569	1800
7-2016-01-28-20-25-01	2016-01-28	20:25:00	DeKUWC	-0.387983	36.9569	1800
7-2016-01-28-20-30-01	2016-01-28	20:30:00	DeKUWC	-0.387983	36.9569	1800
7-2016-01-28-20-35-01	2016-01-28	20:35:00	DeKUWC	-0.387983	36.9569	1800
7-2016-01-28-20-40-01	2016-01-28	20:40:00	DeKUWC	-0.387983	36.9569	1800
7-2016-01-28-20-45-01	2016-01-28	20:45:00	DeKUWC	-0.387983	36.9569	1800
7-2016-01-28-20-50-01	2016-01-28	20:50:00	DeKUWC	-0.387983	36.9569	1800
7-2016-01-28-20-55-02	2016-01-28	20:55:00	DeKUWC	-0.387983	36.9569	1800
7-2016-01-28-21-00-01	2016-01-28	21:00:00	DeKUWC	-0.387983	36.9569	1800
7-2016-01-28-21-05-01	2016-01-28	21:05:00	DeKUWC	-0.387983	36.9569	1800
7-2016-01-28-21-10-01	2016-01-28	21:10:00	DeKUWC	-0.387983	36.9569	1800
7-2016-01-28-21-15-01	2016-01-28	21:15:00	DeKUWC	-0.387983	36.9569	1800
7-2016-01-28-21-20-01	2016-01-28	21:20:00	DeKUWC	-0.387983	36.9569	1800
7-2016-01-28-21-25-01	2016-01-28	21:25:00	DeKUWC	-0.387983	36.9569	1800
7-2016-01-28-21-30-01	2016-01-28	21:30:00	DeKUWC	-0.387983	36.9569	1800
7-2016-01-28-21-35-01	2016-01-28	21:35:00	DeKUWC	-0.387983	36.9569	1800
7-2016-01-28-21-40-01	2016-01-28	21:40:00	DeKUWC	-0.387983	36.9569	1800
7-2016-01-28-21-45-01	2016-01-28	21:45:00	DeKUWC	-0.387983	36.9569	1800
7-2016-01-28-21-50-02	2016-01-28	21:50:00	DeKUWC	-0.387983	36.9569	1800
7-2016-01-28-21-55-01	2016-01-28	21:55:00	DeKUWC	-0.387983	36.9569	1800
7-2016-01-28-22-00-01	2016-01-28	22:00:00	DeKUWC	-0.387983	36.9569	1800
7-2016-01-28-22-05-01	2016-01-28	22:05:00	DeKUWC	-0.387983	36.9569	1800
7-2016-01-28-22-10-01	2016-01-28	22:10:00	DeKUWC	-0.387983	36.9569	1800
7-2016-01-28-22-15-01	2016-01-28	22:15:00	DeKUWC	-0.387983	36.9569	1800
7-2016-01-28-22-20-01	2016-01-28	22:20:00	DeKUWC	-0.387983	36.9569	1800
7-2016-01-28-22-25-01	2016-01-28	22:25:00	DeKUWC	-0.387983	36.9569	1800
7-2016-01-28-22-30-01	2016-01-28	22:30:00	DeKUWC	-0.387983	36.9569	1800
7-2016-01-28-22-35-01	2016-01-28	22:35:00	DeKUWC	-0.387983	36.9569	1800
7-2016-01-28-22-40-01	2016-01-28	22:40:00	DeKUWC	-0.387983	36.9569	1800
7-2016-01-28-22-45-02	2016-01-28	22:45:00	DeKUWC	-0.387983	36.9569	1800
7-2016-01-28-22-50-01	2016-01-28	22:50:00	DeKUWC	-0.387983	36.9569	1800
7-2016-01-28-22-55-01	2016-01-28	22:55:00	DeKUWC	-0.387983	36.9569	1800
7-2016-01-28-23-00-01	2016-01-28	23:00:00	DeKUWC	-0.387983	36.9569	1800
7-2016-01-28-23-05-01	2016-01-28	23:05:00	DeKUWC	-0.387983	36.9569	1800
7-2016-01-28-23-10-01	2016-01-28	23:10:00	DeKUWC	-0.387983	36.9569	1800
7-2016-01-28-23-15-01	2016-01-28	23:15:00	DeKUWC	-0.387983	36.9569	1800
7-2016-01-28-23-20-01	2016-01-28	23:20:00	DeKUWC	-0.387983	36.9569	1800
7-2016-01-28-23-25-01	2016-01-28	23:25:00	DeKUWC	-0.387983	36.9569	1800
7-2016-01-28-23-30-01	2016-01-28	23:30:00	DeKUWC	-0.387983	36.9569	1800
7-2016-01-28-23-35-01	2016-01-28	23:35:00	DeKUWC	-0.387983	36.9569	1800
7-2016-01-28-23-40-02	2016-01-28	23:40:00	DeKUWC	-0.387983	36.9569	1800
7-2016-01-28-23-45-01	2016-01-28	23:45:00	DeKUWC	-0.387983	36.9569	1800
7-2016-01-28-23-50-01	2016-01-28	23:50:00	DeKUWC	-0.387983	36.9569	1800
7-2016-01-28-23-55-01	2016-01-28	23:55:00	DeKUWC	-0.387983	36.9569	1800
7-2016-01-29-00-00-01	2016-01-29	00:00:00	DeKUWC	-0.387983	36.9569	1800
7-2016-01-29-00-05-01	2016-01-29	00:05:00	DeKUWC	-0.387983	36.9569	1800
7-2016-01-29-00-10-01	2016-01-29	00:10:00	DeKUWC	-0.387983	36.9569	1800
7-2016-01-29-00-15-01	2016-01-29	00:15:00	DeKUWC	-0.387983	36.9569	1800
7-2016-01-29-00-20-01	2016-01-29	00:20:00	DeKUWC	-0.387983	36.9569	1800
7-2016-01-29-00-25-01	2016-01-29	00:25:00	DeKUWC	-0.387983	36.9569	1800
7-2016-01-29-00-30-01	2016-01-29	00:30:00	DeKUWC	-0.387983	36.9569	1800
7-2016-01-29-00-35-02	2016-01-29	00:35:00	DeKUWC	-0.387983	36.9569	1800
7-2016-01-29-00-40-01	2016-01-29	00:40:00	DeKUWC	-0.387983	36.9569	1800
7-2016-01-29-00-45-01	2016-01-29	00:45:00	DeKUWC	-0.387983	36.9569	1800
7-2016-01-29-00-50-01	2016-01-29	00:50:00	DeKUWC	-0.387983	36.9569	1800
7-2016-01-29-00-55-01	2016-01-29	00:55:00	DeKUWC	-0.387983	36.9569	1800
7-2016-01-29-01-00-01	2016-01-29	01:00:00	DeKUWC	-0.387983	36.9569	1800
7-2016-01-29-01-05-01	2016-01-29	01:05:00	DeKUWC	-0.387983	36.9569	1800
7-2016-01-29-01-10-01	2016-01-29	01:10:00	DeKUWC	-0.387983	36.9569	1800
7-2016-01-29-01-15-01	2016-01-29	01:15:00	DeKUWC	-0.387983	36.9569	1800
7-2016-01-29-01-20-01	2016-01-29	01:20:00	DeKUWC	-0.387983	36.9569	1800
7-2016-01-29-01-25-01	2016-01-29	01:25:00	DeKUWC	-0.387983	36.9569	1800
7-2016-01-29-01-30-02	2016-01-29	01:30:00	DeKUWC	-0.387983	36.9569	1800
7-2016-01-29-01-35-01	2016-01-29	01:35:00	DeKUWC	-0.387983	36.9569	1800
7-2016-01-29-01-40-01	2016-01-29	01:40:00	DeKUWC	-0.387983	36.9569	1800
7-2016-01-29-01-45-01	2016-01-29	01:45:00	DeKUWC	-0.387983	36.9569	1800
7-2016-01-29-01-50-01	2016-01-29	01:50:00	DeKUWC	-0.387983	36.9569	1800
7-2016-01-29-01-55-01	2016-01-29	01:55:00	DeKUWC	-0.387983	36.9569	1800
7-2016-01-29-02-00-01	2016-01-29	02:00:00	DeKUWC	-0.387983	36.9569	1800
7-2016-01-29-02-05-01	2016-01-29	02:05:00	DeKUWC	-0.387983	36.9569	1800
7-2016-01-29-02-10-01	2016-01-29	02:10:00	DeKUWC	-0.387983	36.9569	1800
7-2016-01-29-02-15-01	2016-01-29	02:15:00	DeKUWC	-0.387983	36.9569	1800
7-2016-01-29-02-20-01	2016-01-29	02:20:00	DeKUWC	-0.387983	36.9569	1800
7-2016-01-29-02-25-02	2016-01-29	02:25:00	DeKUWC	-0.387983	36.9569	1800
7-2016-01-29-02-30-02	2016-01-29	02:30:00	DeKUWC	-0.387983	36.9569	1800
7-2016-01-29-02-35-01	2016-01-29	02:35:00	DeKUWC	-0.387983	36.9569	1800
7-2016-01-29-02-40-01	2016-01-29	02:40:00	DeKUWC	-0.387983	36.9569	1800
7-2016-01-29-02-45-01	2016-01-29	02:45:00	DeKUWC	-0.387983	36.9569	1800
7-2016-01-29-02-50-01	2016-01-29	02:50:00	DeKUWC	-0.387983	36.9569	1800
7-2016-01-29-02-55-01	2016-01-29	02:55:00	DeKUWC	-0.387983	36.9569	1800
7-2016-01-29-03-00-01	2016-01-29	03:00:00	DeKUWC	-0.387983	36.9569	1800
7-2016-01-29-03-05-01	2016-01-29	03:05:00	DeKUWC	-0.387983	36.9569	1800
7-2016-01-29-03-10-01	2016-01-29	03:10:00	DeKUWC	-0.387983	36.9569	1800
7-2016-01-29-03-15-01	2016-01-29	03:15:00	DeKUWC	-0.387983	36.9569	1800
7-2016-01-29-03-20-01	2016-01-29	03:20:00	DeKUWC	-0.387983	36.9569	1800
7-2016-01-29-03-25-02	2016-01-29	03:25:00	DeKUWC	-0.387983	36.9569	1800
7-2016-01-29-03-30-01	2016-01-29	03:30:00	DeKUWC	-0.387983	36.9569	1800
7-2016-01-29-03-35-01	2016-01-29	03:35:00	DeKUWC	-0.387983	36.9569	1800
7-2016-01-29-03-40-01	2016-01-29	03:40:00	DeKUWC	-0.387983	36.9569	1800
7-2016-01-29-03-45-01	2016-01-29	03:45:00	DeKUWC	-0.387983	36.9569	1800
7-2016-01-29-03-50-01	2016-01-29	03:50:00	DeKUWC	-0.387983	36.9569	1800
7-2016-01-29-03-55-01	2016-01-29	03:55:00	DeKUWC	-0.387983	36.9569	1800
7-2016-01-29-04-00-01	2016-01-29	04:00:00	DeKUWC	-0.387983	36.9569	1800
7-2016-01-29-04-05-01	2016-01-29	04:05:00	DeKUWC	-0.387983	36.9569	1800
7-2016-01-29-04-10-01	2016-01-29	04:10:00	DeKUWC	-0.387983	36.9569	1800
7-2016-01-29-04-15-01	2016-01-29	04:15:00	DeKUWC	-0.387983	36.9569	1800
7-2016-01-29-04-20-02	2016-01-29	04:20:00	DeKUWC	-0.387983	36.9569	1800
7-2016-01-29-04-25-01	2016-01-29	04:25:00	DeKUWC	-0.387983	36.9569	1800
7-2016-01-29-04-30-01	2016-01-29	04:30:00	DeKUWC	-0.387983	36.9569	1800
7-2016-01-29-04-35-01	2016-01-29	04:35:00	DeKUWC	-0.387983	36.9569	1800
7-2016-01-29-04-40-01	2016-01-29	04:40:00	DeKUWC	-0.387983	36.9569	1800
7-2016-01-29-04-45-01	2016-01-29	04:45:00	DeKUWC	-0.387983	36.9569	1800
7-2016-01-29-04-50-01	2016-01-29	04:50:00	DeKUWC	-0.387983	36.9569	1800
7-2016-01-29-04-55-01	2016-01-29	04:55:00	DeKUWC	-0.387983	36.9569	1800
7-2016-01-29-05-00-01	2016-01-29	05:00:00	DeKUWC	-0.387983	36.9569	1800
7-2016-01-29-05-05-01	2016-01-29	05:05:00	DeKUWC	-0.387983	36.9569	1800
7-2016-01-29-05-10-01	2016-01-29	05:10:00	DeKUWC	-0.387983	36.9569	1800
7-2016-01-29-05-15-01	2016-01-29	05:15:00	DeKUWC	-0.387983	36.9569	1800
7-2016-01-29-05-20-01	2016-01-29	05:20:00	DeKUWC	-0.387983	36.9569	1800
7-2016-01-29-05-25-01	2016-01-29	05:25:00	DeKUWC	-0.387983	36.9569	1800
7-2016-01-29-05-30-01	2016-01-29	05:30:00	DeKUWC	-0.387983	36.9569	1800
7-2016-01-29-05-35-01	2016-01-29	05:35:00	DeKUWC	-0.387983	36.9569	1800
7-2016-01-29-05-40-01	2016-01-29	05:40:00	DeKUWC	-0.387983	36.9569	1800
7-2016-01-29-05-45-01	2016-01-29	05:45:00	DeKUWC	-0.387983	36.9569	1800
7-2016-01-29-05-50-01	2016-01-29	05:50:00	DeKUWC	-0.387983	36.9569	1800
7-2016-01-29-05-55-01	2016-01-29	05:55:00	DeKUWC	-0.387983	36.9569	1800
7-2016-01-29-06-00-01	2016-01-29	06:00:00	DeKUWC	-0.387983	36.9569	1800
7-2016-01-29-06-05-01	2016-01-29	06:05:00	DeKUWC	-0.387983	36.9569	1800
7-2016-01-29-06-10-01	2016-01-29	06:10:00	DeKUWC	-0.387983	36.9569	1800		YWGR	Engine noise
7-2016-01-29-06-15-01	2016-01-29	06:15:00	DeKUWC	-0.387983	36.9569	1800		YWGR;COSU	Engine noise
7-2016-01-29-06-20-01	2016-01-29	06:20:00	DeKUWC	-0.387983	36.9569	1800
7-2016-01-29-06-25-01	2016-01-29	06:25:00	DeKUWC	-0.387983	36.9569	1800
7-2016-01-29-06-30-01	2016-01-29	06:30:00	DeKUWC	-0.387983	36.9569	1800
7-2016-01-29-06-35-01	2016-01-29	06:35:00	DeKUWC	-0.387983	36.9569	1800
7-2016-01-29-06-40-01	2016-01-29	06:40:00	DeKUWC	-0.387983	36.9569	1800
7-2016-01-29-06-45-01	2016-01-29	06:45:00	DeKUWC	-0.387983	36.9569	1800
7-2016-01-29-06-50-01	2016-01-29	06:50:00	DeKUWC	-0.387983	36.9569	1800		GBCA;BHOR	Engine noise
7-2016-01-29-06-55-01	2016-01-29	06:55:00	DeKUWC	-0.387983	36.9569	1800
7-2016-01-29-07-00-01	2016-01-29	07:00:00	DeKUWC	-0.387983	36.9569	1800
7-2016-01-29-07-05-01	2016-01-29	07:05:00	DeKUWC	-0.387983	36.9569	1800
7-2016-01-29-07-10-01	2016-01-29	07:10:00	DeKUWC	-0.387983	36.9569	1800
7-2016-01-29-07-15-01	2016-01-29	07:15:00	DeKUWC	-0.387983	36.9569	1800
7-2016-01-29-07-20-01	2016-01-29	07:20:00	DeKUWC	-0.387983	36.9569	1800
7-2016-01-29-07-25-01	2016-01-29	07:25:00	DeKUWC	-0.387983	36.9569	1800		GBCA	Engine noise
7-2016-01-29-07-30-02	2016-01-29	07:30:00	DeKUWC	-0.387983	36.9569	1800
7-2016-01-29-07-35-01	2016-01-29	07:35:00	DeKUWC	-0.387983	36.9569	1800
7-2016-01-29-07-40-01	2016-01-29	07:40:00	DeKUWC	-0.387983	36.9569	1800
7-2016-01-29-07-45-01	2016-01-29	07:45:00	DeKUWC	-0.387983	36.9569	1800
7-2016-01-29-07-50-01	2016-01-29	07:50:00	DeKUWC	-0.387983	36.9569	1800
7-2016-01-29-07-55-01	2016-01-29	07:55:00	DeKUWC	-0.387983	36.9569	1800
7-2016-01-29-08-00-01	2016-01-29	08:00:00	DeKUWC	-0.387983	36.9569	1800
7-2016-01-29-08-05-01	2016-01-29	08:05:00	DeKUWC	-0.387983	36.9569	1800
7-2016-01-29-08-10-01	2016-01-29	08:10:00	DeKUWC	-0.387983	36.9569	1800	GBCA		Engine noise
7-2016-01-29-08-15-01	2016-01-29	08:15:00	DeKUWC	-0.387983	36.9569	1800
7-2016-01-29-08-20-01	2016-01-29	08:20:00	DeKUWC	-0.387983	36.9569	1800
7-2016-01-29-08-25-01	2016-01-29	08:25:00	DeKUWC	-0.387983	36.9569	1800
7-2016-01-29-08-30-01	2016-01-29	08:30:00	DeKUWC	-0.387983	36.9569	1800
7-2016-01-29-08-35-01	2016-01-29	08:35:00	DeKUWC	-0.387983	36.9569	1800
7-2016-01-29-08-40-01	2016-01-29	08:40:00	DeKUWC	-0.387983	36.9569	1800
7-2016-01-29-08-45-01	2016-01-29	08:45:00	DeKUWC	-0.387983	36.9569	1800
7-2016-01-29-08-50-01	2016-01-29	08:50:00	DeKUWC	-0.387983	36.9569	1800
7-2016-01-29-08-55-02	2016-01-29	08:55:00	DeKUWC	-0.387983	36.9569	1800		YWGR	Engine noise
7-2016-01-29-09-00-01	2016-01-29	09:00:00	DeKUWC	-0.387983	36.9569	1800
7-2016-01-29-09-05-01	2016-01-29	09:05:00	DeKUWC	-0.387983	36.9569	1800
7-2016-01-29-09-10-01	2016-01-29	09:10:00	DeKUWC	-0.387983	36.9569	1800
7-2016-01-29-09-15-01	2016-01-29	09:15:00	DeKUWC	-0.387983	36.9569	1800
7-2016-01-29-09-20-01	2016-01-29	09:20:00	DeKUWC	-0.387983	36.9569	1800
7-2016-01-29-09-25-01	2016-01-29	09:25:00	DeKUWC	-0.387983	36.9569	1800
7-2016-01-29-09-30-01	2016-01-29	09:30:00	DeKUWC	-0.387983	36.9569	1800
7-2016-01-29-09-35-01	2016-01-29	09:35:00	DeKUWC	-0.387983	36.9569	1800
7-2016-01-29-09-40-01	2016-01-29	09:40:00	DeKUWC	-0.387983	36.9569	1800
7-2016-01-29-09-45-01	2016-01-29	09:45:00	DeKUWC	-0.387983	36.9569	1800
7-2016-01-29-09-50-01	2016-01-29	09:50:00	DeKUWC	-0.387983	36.9569	1800
7-2016-01-29-09-55-01	2016-01-29	09:55:00	DeKUWC	-0.387983	36.9569	1800
7-2016-01-29-10-00-01	2016-01-29	10:00:00	DeKUWC	-0.387983	36.9569	1800		COSU;SCHO
7-2016-01-29-10-05-01	2016-01-29	10:05:00	DeKUWC	-0.387983	36.9569	1800
7-2016-01-29-10-10-01	2016-01-29	10:10:00	DeKUWC	-0.387983	36.9569	1800
7-2016-01-29-10-15-01	2016-01-29	10:15:00	DeKUWC	-0.387983	36.9569	1800
7-2016-01-29-10-20-01	2016-01-29	10:20:00	DeKUWC	-0.387983	36.9569	1800
7-2016-01-29-10-25-01	2016-01-29	10:25:00	DeKUWC	-0.387983	36.9569	1800
7-2016-01-29-10-30-01	2016-01-29	10:30:00	DeKUWC	-0.387983	36.9569	1800
7-2016-01-29-10-35-01	2016-01-29	10:35:00	DeKUWC	-0.387983	36.9569	1800
7-2016-01-29-10-40-01	2016-01-29	10:40:00	DeKUWC	-0.387983	36.9569	1800
7-2016-01-29-10-45-01	2016-01-29	10:45:00	DeKUWC	-0.387983	36.9569	1800		TRBO;YWGR
7-2016-01-29-10-50-01	2016-01-29	10:50:00	DeKUWC	-0.387983	36.9569	1800
7-2016-01-29-10-55-01	2016-01-29	10:55:00	DeKUWC	-0.387983	36.9569	1800
7-2016-01-29-11-00-01	2016-01-29	11:00:00	DeKUWC	-0.387983	36.9569	1800
7-2016-01-29-11-05-01	2016-01-29	11:05:00	DeKUWC	-0.387983	36.9569	1800
7-2016-01-29-11-10-01	2016-01-29	11:10:00	DeKUWC	-0.387983	36.9569	1800
7-2016-01-29-11-15-01	2016-01-29	11:15:00	DeKUWC	-0.387983	36.9569	1800
7-2016-01-29-11-20-01	2016-01-29	11:20:00	DeKUWC	-0.387983	36.9569	1800
7-2016-01-29-11-25-01	2016-01-29	11:25:00	DeKUWC	-0.387983	36.9569	1800
7-2016-01-29-11-30-01	2016-01-29	11:30:00	DeKUWC	-0.387983	36.9569	1800
7-2016-01-29-11-35-02	2016-01-29	11:35:00	DeKUWC	-0.387983	36.9569	1800
7-2016-01-29-11-40-01	2016-01-29	11:40:00	DeKUWC	-0.387983	36.9569	1800
7-2016-01-29-11-45-01	2016-01-29	11:45:00	DeKUWC	-0.387983	36.9569	1800		YWGR	Engine noise
7-2016-01-29-11-50-01	2016-01-29	11:50:00	DeKUWC	-0.387983	36.9569	1800
7-2016-01-29-11-55-01	2016-01-29	11:55:00	DeKUWC	-0.387983	36.9569	1800
7-2016-01-29-12-00-01	2016-01-29	12:00:00	DeKUWC	-0.387983	36.9569	1800
7-2016-01-29-12-05-01	2016-01-29	12:05:00	DeKUWC	-0.387983	36.9569	1800
7-2016-01-29-12-10-01	2016-01-29	12:10:00	DeKUWC	-0.387983	36.9569	1800
7-2016-01-29-12-15-01	2016-01-29	12:15:00	DeKUWC	-0.387983	36.9569	1800
7-2016-01-29-12-20-01	2016-01-29	12:20:00	DeKUWC	-0.387983	36.9569	1800
7-2016-01-29-12-25-01	2016-01-29	12:25:00	DeKUWC	-0.387983	36.9569	1800
7-2016-01-29-12-30-01	2016-01-29	12:30:00	DeKUWC	-0.387983	36.9569	1800
7-2016-01-29-12-35-01	2016-01-29	12:35:00	DeKUWC	-0.387983	36.9569	1800
7-2016-01-29-12-40-01	2016-01-29	12:40:00	DeKUWC	-0.387983	36.9569	1800
7-2016-01-29-12-45-01	2016-01-29	12:45:00	DeKUWC	-0.387983	36.9569	1800
7-2016-01-29-12-50-01	2016-01-29	12:50:00	DeKUWC	-0.387983	36.9569	1800
7-2016-01-29-12-55-02	2016-01-29	12:55:00	DeKUWC	-0.387983	36.9569	1800
7-2016-01-29-13-00-02	2016-01-29	13:00:00	DeKUWC	-0.387983	36.9569	1800
7-2016-01-29-13-05-01	2016-01-29	13:05:00	DeKUWC	-0.387983	36.9569	1800
7-2016-01-29-13-10-01	2016-01-29	13:10:00	DeKUWC	-0.387983	36.9569	1800

## Sheet: 8
Filename	Date	Time	Location	Latitude	Longitude	Elevation	Foreground Species	Background Species	Remarks
8-2016-01-28-10-10-02	2016-01-28	10:10:00	DeKUWC	-0.387087	36.957	1769
8-2016-01-28-10-15-01	2016-01-28	10:15:00	DeKUWC	-0.387087	36.957	1769
8-2016-01-28-10-20-01	2016-01-28	10:20:00	DeKUWC	-0.387087	36.957	1769
8-2016-01-28-10-25-01	2016-01-28	10:25:00	DeKUWC	-0.387087	36.957	1769	GBCA	YWGR
8-2016-01-28-10-30-01	2016-01-28	10:30:00	DeKUWC	-0.387087	36.957	1769
8-2016-01-28-10-35-01	2016-01-28	10:35:00	DeKUWC	-0.387087	36.957	1769
8-2016-01-28-10-40-01	2016-01-28	10:40:00	DeKUWC	-0.387087	36.957	1769
8-2016-01-28-10-45-01	2016-01-28	10:45:00	DeKUWC	-0.387087	36.957	1769
8-2016-01-28-10-50-01	2016-01-28	10:50:00	DeKUWC	-0.387087	36.957	1769
8-2016-01-28-10-55-01	2016-01-28	10:55:00	DeKUWC	-0.387087	36.957	1769
8-2016-01-28-11-00-01	2016-01-28	11:00:00	DeKUWC	-0.387087	36.957	1769
8-2016-01-28-11-05-01	2016-01-28	11:05:00	DeKUWC	-0.387087	36.957	1769
8-2016-01-28-11-10-01	2016-01-28	11:10:00	DeKUWC	-0.387087	36.957	1769
8-2016-01-28-11-15-01	2016-01-28	11:15:00	DeKUWC	-0.387087	36.957	1769
8-2016-01-28-11-20-01	2016-01-28	11:20:00	DeKUWC	-0.387087	36.957	1769
8-2016-01-28-11-25-01	2016-01-28	11:25:00	DeKUWC	-0.387087	36.957	1769
8-2016-01-28-11-30-01	2016-01-28	11:30:00	DeKUWC	-0.387087	36.957	1769
8-2016-01-28-11-35-02	2016-01-28	11:35:00	DeKUWC	-0.387087	36.957	1769
8-2016-01-28-11-40-01	2016-01-28	11:40:00	DeKUWC	-0.387087	36.957	1769
8-2016-01-28-11-45-01	2016-01-28	11:45:00	DeKUWC	-0.387087	36.957	1769
8-2016-01-28-11-50-01	2016-01-28	11:50:00	DeKUWC	-0.387087	36.957	1769
8-2016-01-28-11-55-01	2016-01-28	11:55:00	DeKUWC	-0.387087	36.957	1769
8-2016-01-28-12-00-02	2016-01-28	12:00:00	DeKUWC	-0.387087	36.957	1769
8-2016-01-28-12-05-01	2016-01-28	12:05:00	DeKUWC	-0.387087	36.957	1769
8-2016-01-28-12-10-01	2016-01-28	12:10:00	DeKUWC	-0.387087	36.957	1769
8-2016-01-28-12-15-01	2016-01-28	12:15:00	DeKUWC	-0.387087	36.957	1769		GBCA;YWGR;YRTI;NDCS
8-2016-01-28-12-20-02	2016-01-28	12:20:00	DeKUWC	-0.387087	36.957	1769
8-2016-01-28-12-25-01	2016-01-28	12:25:00	DeKUWC	-0.387087	36.957	1769	GBCA;YWGR
8-2016-01-28-12-30-01	2016-01-28	12:30:00	DeKUWC	-0.387087	36.957	1769
8-2016-01-28-12-35-01	2016-01-28	12:35:00	DeKUWC	-0.387087	36.957	1769
8-2016-01-28-12-40-01	2016-01-28	12:40:00	DeKUWC	-0.387087	36.957	1769
8-2016-01-28-12-45-02	2016-01-28	12:45:00	DeKUWC	-0.387087	36.957	1769
8-2016-01-28-12-50-01	2016-01-28	12:50:00	DeKUWC	-0.387087	36.957	1769
8-2016-01-28-12-55-01	2016-01-28	12:55:00	DeKUWC	-0.387087	36.957	1769
8-2016-01-28-13-00-01	2016-01-28	13:00:00	DeKUWC	-0.387087	36.957	1769
8-2016-01-28-13-05-01	2016-01-28	13:05:00	DeKUWC	-0.387087	36.957	1769
8-2016-01-28-13-10-02	2016-01-28	13:10:00	DeKUWC	-0.387087	36.957	1769
8-2016-01-28-13-15-01	2016-01-28	13:15:00	DeKUWC	-0.387087	36.957	1769
8-2016-01-28-13-20-01	2016-01-28	13:20:00	DeKUWC	-0.387087	36.957	1769
8-2016-01-28-13-25-01	2016-01-28	13:25:00	DeKUWC	-0.387087	36.957	1769
8-2016-01-28-13-30-02	2016-01-28	13:30:00	DeKUWC	-0.387087	36.957	1769
8-2016-01-28-13-35-01	2016-01-28	13:35:00	DeKUWC	-0.387087	36.957	1769
8-2016-01-28-13-40-01	2016-01-28	13:40:00	DeKUWC	-0.387087	36.957	1769
8-2016-01-28-13-45-01	2016-01-28	13:45:00	DeKUWC	-0.387087	36.957	1769
8-2016-01-28-13-50-01	2016-01-28	13:50:00	DeKUWC	-0.387087	36.957	1769
8-2016-01-28-13-55-02	2016-01-28	13:55:00	DeKUWC	-0.387087	36.957	1769
8-2016-01-28-14-00-01	2016-01-28	14:00:00	DeKUWC	-0.387087	36.957	1769
8-2016-01-28-14-05-01	2016-01-28	14:05:00	DeKUWC	-0.387087	36.957	1769
8-2016-01-28-14-10-01	2016-01-28	14:10:00	DeKUWC	-0.387087	36.957	1769
8-2016-01-28-14-15-01	2016-01-28	14:15:00	DeKUWC	-0.387087	36.957	1769	YWGR;OLSU
8-2016-01-28-14-20-01	2016-01-28	14:20:00	DeKUWC	-0.387087	36.957	1769
8-2016-01-28-14-25-01	2016-01-28	14:25:00	DeKUWC	-0.387087	36.957	1769
8-2016-01-28-14-30-01	2016-01-28	14:30:00	DeKUWC	-0.387087	36.957	1769		YWGR;HATU
8-2016-01-28-14-35-01	2016-01-28	14:35:00	DeKUWC	-0.387087	36.957	1769
8-2016-01-28-14-40-02	2016-01-28	14:40:00	DeKUWC	-0.387087	36.957	1769
8-2016-01-28-14-45-01	2016-01-28	14:45:00	DeKUWC	-0.387087	36.957	1769
8-2016-01-28-14-50-01	2016-01-28	14:50:00	DeKUWC	-0.387087	36.957	1769
8-2016-01-28-14-55-01	2016-01-28	14:55:00	DeKUWC	-0.387087	36.957	1769
8-2016-01-28-15-00-01	2016-01-28	15:00:00	DeKUWC	-0.387087	36.957	1769
8-2016-01-28-15-05-02	2016-01-28	15:05:00	DeKUWC	-0.387087	36.957	1769
8-2016-01-28-15-10-01	2016-01-28	15:10:00	DeKUWC	-0.387087	36.957	1769
8-2016-01-28-15-15-01	2016-01-28	15:15:00	DeKUWC	-0.387087	36.957	1769
8-2016-01-28-15-20-01	2016-01-28	15:20:00	DeKUWC	-0.387087	36.957	1769
8-2016-01-28-15-25-01	2016-01-28	15:25:00	DeKUWC	-0.387087	36.957	1769
8-2016-01-28-15-30-01	2016-01-28	15:30:00	DeKUWC	-0.387087	36.957	1769
8-2016-01-28-15-35-01	2016-01-28	15:35:00	DeKUWC	-0.387087	36.957	1769	OLTH;YWGR;SCHO;CHBA;HATU
8-2016-01-28-15-40-01	2016-01-28	15:40:00	DeKUWC	-0.387087	36.957	1769
8-2016-01-28-15-45-01	2016-01-28	15:45:00	DeKUWC	-0.387087	36.957	1769
8-2016-01-28-15-50-01	2016-01-28	15:50:00	DeKUWC	-0.387087	36.957	1769
8-2016-01-28-15-55-01	2016-01-28	15:55:00	DeKUWC	-0.387087	36.957	1769
8-2016-01-28-16-00-01	2016-01-28	16:00:00	DeKUWC	-0.387087	36.957	1769
8-2016-01-28-16-05-01	2016-01-28	16:05:00	DeKUWC	-0.387087	36.957	1769
8-2016-01-28-16-10-01	2016-01-28	16:10:00	DeKUWC	-0.387087	36.957	1769
8-2016-01-28-16-15-01	2016-01-28	16:15:00	DeKUWC	-0.387087	36.957	1769	RURC;BHOR;YWGR;SCHO		Robin-Chat mimicking Olive Thrush
8-2016-01-28-16-20-01	2016-01-28	16:20:00	DeKUWC	-0.387087	36.957	1769	GBCA;YWGR;OLTH	OLSU
8-2016-01-28-16-25-01	2016-01-28	16:25:00	DeKUWC	-0.387087	36.957	1769
8-2016-01-28-16-30-02	2016-01-28	16:30:00	DeKUWC	-0.387087	36.957	1769
8-2016-01-28-16-35-01	2016-01-28	16:35:00	DeKUWC	-0.387087	36.957	1769
8-2016-01-28-16-40-01	2016-01-28	16:40:00	DeKUWC	-0.387087	36.957	1769
8-2016-01-28-16-45-01	2016-01-28	16:45:00	DeKUWC	-0.387087	36.957	1769
8-2016-01-28-16-50-01	2016-01-28	16:50:00	DeKUWC	-0.387087	36.957	1769
8-2016-01-28-16-55-02	2016-01-28	16:55:00	DeKUWC	-0.387087	36.957	1769
8-2016-01-28-17-00-01	2016-01-28	17:00:00	DeKUWC	-0.387087	36.957	1769		HATU;YWGR;YRTI	Engine noise
8-2016-01-28-17-05-01	2016-01-28	17:05:00	DeKUWC	-0.387087	36.957	1769
8-2016-01-28-17-10-01	2016-01-28	17:10:00	DeKUWC	-0.387087	36.957	1769
8-2016-01-28-17-15-01	2016-01-28	17:15:00	DeKUWC	-0.387087	36.957	1769
8-2016-01-28-17-20-01	2016-01-28	17:20:00	DeKUWC	-0.387087	36.957	1769
8-2016-01-28-17-25-01	2016-01-28	17:25:00	DeKUWC	-0.387087	36.957	1769
8-2016-01-28-17-30-01	2016-01-28	17:30:00	DeKUWC	-0.387087	36.957	1769
8-2016-01-28-17-35-01	2016-01-28	17:35:00	DeKUWC	-0.387087	36.957	1769	COSU	YWGR;HATU	Engine noise; People shouting; Music
8-2016-01-28-17-40-02	2016-01-28	17:40:00	DeKUWC	-0.387087	36.957	1769
8-2016-01-28-17-45-01	2016-01-28	17:45:00	DeKUWC	-0.387087	36.957	1769
8-2016-01-28-17-50-01	2016-01-28	17:50:00	DeKUWC	-0.387087	36.957	1769
8-2016-01-28-17-55-01	2016-01-28	17:55:00	DeKUWC	-0.387087	36.957	1769
8-2016-01-28-18-00-01	2016-01-28	18:00:00	DeKUWC	-0.387087	36.957	1769
8-2016-01-28-18-05-02	2016-01-28	18:05:00	DeKUWC	-0.387087	36.957	1769
8-2016-01-28-18-10-01	2016-01-28	18:10:00	DeKUWC	-0.387087	36.957	1769
8-2016-01-28-18-15-01	2016-01-28	18:15:00	DeKUWC	-0.387087	36.957	1769
8-2016-01-28-18-20-01	2016-01-28	18:20:00	DeKUWC	-0.387087	36.957	1769
8-2016-01-28-18-25-02	2016-01-28	18:25:00	DeKUWC	-0.387087	36.957	1769
8-2016-01-28-18-30-01	2016-01-28	18:30:00	DeKUWC	-0.387087	36.957	1769
8-2016-01-28-18-35-01	2016-01-28	18:35:00	DeKUWC	-0.387087	36.957	1769
8-2016-01-28-18-40-01	2016-01-28	18:40:00	DeKUWC	-0.387087	36.957	1769
8-2016-01-28-18-45-01	2016-01-28	18:45:00	DeKUWC	-0.387087	36.957	1769
8-2016-01-28-18-50-02	2016-01-28	18:50:00	DeKUWC	-0.387087	36.957	1769
8-2016-01-28-18-55-01	2016-01-28	18:55:00	DeKUWC	-0.387087	36.957	1769
8-2016-01-28-19-00-01	2016-01-28	19:00:00	DeKUWC	-0.387087	36.957	1769
8-2016-01-28-19-05-01	2016-01-28	19:05:00	DeKUWC	-0.387087	36.957	1769
8-2016-01-28-19-10-01	2016-01-28	19:10:00	DeKUWC	-0.387087	36.957	1769
8-2016-01-28-19-15-02	2016-01-28	19:15:00	DeKUWC	-0.387087	36.957	1769
8-2016-01-28-19-20-01	2016-01-28	19:20:00	DeKUWC	-0.387087	36.957	1769
8-2016-01-28-19-25-01	2016-01-28	19:25:00	DeKUWC	-0.387087	36.957	1769
8-2016-01-28-19-30-01	2016-01-28	19:30:00	DeKUWC	-0.387087	36.957	1769
8-2016-01-28-19-35-01	2016-01-28	19:35:00	DeKUWC	-0.387087	36.957	1769
8-2016-01-28-19-40-01	2016-01-28	19:40:00	DeKUWC	-0.387087	36.957	1769
8-2016-01-28-19-45-01	2016-01-28	19:45:00	DeKUWC	-0.387087	36.957	1769
8-2016-01-28-19-50-01	2016-01-28	19:50:00	DeKUWC	-0.387087	36.957	1769
8-2016-01-28-19-55-01	2016-01-28	19:55:00	DeKUWC	-0.387087	36.957	1769
8-2016-01-28-20-00-01	2016-01-28	20:00:00	DeKUWC	-0.387087	36.957	1769
8-2016-01-28-20-05-01	2016-01-28	20:05:00	DeKUWC	-0.387087	36.957	1769
8-2016-01-28-20-10-01	2016-01-28	20:10:00	DeKUWC	-0.387087	36.957	1769
8-2016-01-28-20-15-01	2016-01-28	20:15:00	DeKUWC	-0.387087	36.957	1769
8-2016-01-28-20-20-01	2016-01-28	20:20:00	DeKUWC	-0.387087	36.957	1769
8-2016-01-28-20-25-01	2016-01-28	20:25:00	DeKUWC	-0.387087	36.957	1769
8-2016-01-28-20-30-01	2016-01-28	20:30:00	DeKUWC	-0.387087	36.957	1769
8-2016-01-28-20-35-01	2016-01-28	20:35:00	DeKUWC	-0.387087	36.957	1769
8-2016-01-28-20-40-02	2016-01-28	20:40:00	DeKUWC	-0.387087	36.957	1769
8-2016-01-28-20-45-01	2016-01-28	20:45:00	DeKUWC	-0.387087	36.957	1769
8-2016-01-28-20-50-01	2016-01-28	20:50:00	DeKUWC	-0.387087	36.957	1769
8-2016-01-28-20-55-01	2016-01-28	20:55:00	DeKUWC	-0.387087	36.957	1769
8-2016-01-28-21-00-01	2016-01-28	21:00:00	DeKUWC	-0.387087	36.957	1769
8-2016-01-28-21-05-02	2016-01-28	21:05:00	DeKUWC	-0.387087	36.957	1769
8-2016-01-28-21-10-01	2016-01-28	21:10:00	DeKUWC	-0.387087	36.957	1769
8-2016-01-28-21-15-01	2016-01-28	21:15:00	DeKUWC	-0.387087	36.957	1769
8-2016-01-28-21-20-01	2016-01-28	21:20:00	DeKUWC	-0.387087	36.957	1769
8-2016-01-28-21-25-02	2016-01-28	21:25:00	DeKUWC	-0.387087	36.957	1769
8-2016-01-28-21-30-01	2016-01-28	21:30:00	DeKUWC	-0.387087	36.957	1769
8-2016-01-28-21-35-01	2016-01-28	21:35:00	DeKUWC	-0.387087	36.957	1769
8-2016-01-28-21-40-01	2016-01-28	21:40:00	DeKUWC	-0.387087	36.957	1769
8-2016-01-28-21-45-01	2016-01-28	21:45:00	DeKUWC	-0.387087	36.957	1769
8-2016-01-28-21-50-02	2016-01-28	21:50:00	DeKUWC	-0.387087	36.957	1769
8-2016-01-28-21-55-01	2016-01-28	21:55:00	DeKUWC	-0.387087	36.957	1769
8-2016-01-28-22-00-01	2016-01-28	22:00:00	DeKUWC	-0.387087	36.957	1769
8-2016-01-28-22-05-01	2016-01-28	22:05:00	DeKUWC	-0.387087	36.957	1769
8-2016-01-28-22-10-01	2016-01-28	22:10:00	DeKUWC	-0.387087	36.957	1769
8-2016-01-28-22-15-02	2016-01-28	22:15:00	DeKUWC	-0.387087	36.957	1769
8-2016-01-28-22-20-01	2016-01-28	22:20:00	DeKUWC	-0.387087	36.957	1769
8-2016-01-28-22-25-01	2016-01-28	22:25:00	DeKUWC	-0.387087	36.957	1769
8-2016-01-28-22-30-01	2016-01-28	22:30:00	DeKUWC	-0.387087	36.957	1769
8-2016-01-28-22-35-02	2016-01-28	22:35:00	DeKUWC	-0.387087	36.957	1769
8-2016-01-28-22-40-01	2016-01-28	22:40:00	DeKUWC	-0.387087	36.957	1769
8-2016-01-28-22-45-01	2016-01-28	22:45:00	DeKUWC	-0.387087	36.957	1769
8-2016-01-28-22-50-01	2016-01-28	22:50:00	DeKUWC	-0.387087	36.957	1769
8-2016-01-28-22-55-01	2016-01-28	22:55:00	DeKUWC	-0.387087	36.957	1769
8-2016-01-28-23-00-02	2016-01-28	23:00:00	DeKUWC	-0.387087	36.957	1769
8-2016-01-28-23-05-01	2016-01-28	23:05:00	DeKUWC	-0.387087	36.957	1769
8-2016-01-28-23-10-01	2016-01-28	23:10:00	DeKUWC	-0.387087	36.957	1769
8-2016-01-28-23-15-01	2016-01-28	23:15:00	DeKUWC	-0.387087	36.957	1769
8-2016-01-28-23-20-01	2016-01-28	23:20:00	DeKUWC	-0.387087	36.957	1769
8-2016-01-28-23-25-01	2016-01-28	23:25:00	DeKUWC	-0.387087	36.957	1769
8-2016-01-28-23-30-01	2016-01-28	23:30:00	DeKUWC	-0.387087	36.957	1769
8-2016-01-28-23-35-01	2016-01-28	23:35:00	DeKUWC	-0.387087	36.957	1769
8-2016-01-28-23-40-01	2016-01-28	23:40:00	DeKUWC	-0.387087	36.957	1769
8-2016-01-28-23-45-01	2016-01-28	23:45:00	DeKUWC	-0.387087	36.957	1769
8-2016-01-28-23-50-01	2016-01-28	23:50:00	DeKUWC	-0.387087	36.957	1769
8-2016-01-28-23-55-01	2016-01-28	23:55:00	DeKUWC	-0.387087	36.957	1769
8-2016-01-29-00-00-01	2016-01-29	00:00:00	DeKUWC	-0.387087	36.957	1769
8-2016-01-29-00-05-01	2016-01-29	00:05:00	DeKUWC	-0.387087	36.957	1769
8-2016-01-29-00-10-01	2016-01-29	00:10:00	DeKUWC	-0.387087	36.957	1769
8-2016-01-29-00-15-01	2016-01-29	00:15:00	DeKUWC	-0.387087	36.957	1769
8-2016-01-29-00-20-01	2016-01-29	00:20:00	DeKUWC	-0.387087	36.957	1769
8-2016-01-29-00-25-02	2016-01-29	00:25:00	DeKUWC	-0.387087	36.957	1769
8-2016-01-29-00-30-01	2016-01-29	00:30:00	DeKUWC	-0.387087	36.957	1769
8-2016-01-29-00-35-01	2016-01-29	00:35:00	DeKUWC	-0.387087	36.957	1769
8-2016-01-29-00-40-01	2016-01-29	00:40:00	DeKUWC	-0.387087	36.957	1769
8-2016-01-29-00-45-01	2016-01-29	00:45:00	DeKUWC	-0.387087	36.957	1769
8-2016-01-29-00-50-02	2016-01-29	00:50:00	DeKUWC	-0.387087	36.957	1769
8-2016-01-29-00-55-01	2016-01-29	00:55:00	DeKUWC	-0.387087	36.957	1769
8-2016-01-29-01-00-01	2016-01-29	01:00:00	DeKUWC	-0.387087	36.957	1769
8-2016-01-29-01-05-01	2016-01-29	01:05:00	DeKUWC	-0.387087	36.957	1769
8-2016-01-29-01-10-01	2016-01-29	01:10:00	DeKUWC	-0.387087	36.957	1769
8-2016-01-29-01-15-02	2016-01-29	01:15:00	DeKUWC	-0.387087	36.957	1769
8-2016-01-29-01-20-01	2016-01-29	01:20:00	DeKUWC	-0.387087	36.957	1769
8-2016-01-29-01-25-01	2016-01-29	01:25:00	DeKUWC	-0.387087	36.957	1769
8-2016-01-29-01-30-01	2016-01-29	01:30:00	DeKUWC	-0.387087	36.957	1769
8-2016-01-29-01-35-02	2016-01-29	01:35:00	DeKUWC	-0.387087	36.957	1769
8-2016-01-29-01-40-01	2016-01-29	01:40:00	DeKUWC	-0.387087	36.957	1769
8-2016-01-29-01-45-01	2016-01-29	01:45:00	DeKUWC	-0.387087	36.957	1769
8-2016-01-29-01-50-01	2016-01-29	01:50:00	DeKUWC	-0.387087	36.957	1769
8-2016-01-29-01-55-01	2016-01-29	01:55:00	DeKUWC	-0.387087	36.957	1769
8-2016-01-29-02-00-02	2016-01-29	02:00:00	DeKUWC	-0.387087	36.957	1769
8-2016-01-29-02-05-01	2016-01-29	02:05:00	DeKUWC	-0.387087	36.957	1769
8-2016-01-29-02-10-01	2016-01-29	02:10:00	DeKUWC	-0.387087	36.957	1769
8-2016-01-29-02-15-01	2016-01-29	02:15:00	DeKUWC	-0.387087	36.957	1769
8-2016-01-29-02-20-02	2016-01-29	02:20:00	DeKUWC	-0.387087	36.957	1769
8-2016-01-29-02-25-01	2016-01-29	02:25:00	DeKUWC	-0.387087	36.957	1769
8-2016-01-29-02-30-01	2016-01-29	02:30:00	DeKUWC	-0.387087	36.957	1769
8-2016-01-29-02-35-01	2016-01-29	02:35:00	DeKUWC	-0.387087	36.957	1769
8-2016-01-29-02-40-01	2016-01-29	02:40:00	DeKUWC	-0.387087	36.957	1769
8-2016-01-29-02-45-02	2016-01-29	02:45:00	DeKUWC	-0.387087	36.957	1769
8-2016-01-29-02-50-01	2016-01-29	02:50:00	DeKUWC	-0.387087	36.957	1769
8-2016-01-29-02-55-01	2016-01-29	02:55:00	DeKUWC	-0.387087	36.957	1769
8-2016-01-29-03-00-01	2016-01-29	03:00:00	DeKUWC	-0.387087	36.957	1769
8-2016-01-29-03-05-01	2016-01-29	03:05:00	DeKUWC	-0.387087	36.957	1769
8-2016-01-29-03-10-02	2016-01-29	03:10:00	DeKUWC	-0.387087	36.957	1769
8-2016-01-29-03-15-01	2016-01-29	03:15:00	DeKUWC	-0.387087	36.957	1769
8-2016-01-29-03-20-01	2016-01-29	03:20:00	DeKUWC	-0.387087	36.957	1769
8-2016-01-29-03-25-01	2016-01-29	03:25:00	DeKUWC	-0.387087	36.957	1769
8-2016-01-29-03-30-01	2016-01-29	03:30:00	DeKUWC	-0.387087	36.957	1769
8-2016-01-29-03-35-01	2016-01-29	03:35:00	DeKUWC	-0.387087	36.957	1769
8-2016-01-29-03-40-01	2016-01-29	03:40:00	DeKUWC	-0.387087	36.957	1769
8-2016-01-29-03-45-01	2016-01-29	03:45:00	DeKUWC	-0.387087	36.957	1769
8-2016-01-29-03-50-01	2016-01-29	03:50:00	DeKUWC	-0.387087	36.957	1769
8-2016-01-29-03-55-01	2016-01-29	03:55:00	DeKUWC	-0.387087	36.957	1769
8-2016-01-29-04-00-01	2016-01-29	04:00:00	DeKUWC	-0.387087	36.957	1769
8-2016-01-29-04-05-01	2016-01-29	04:05:00	DeKUWC	-0.387087	36.957	1769
8-2016-01-29-04-10-01	2016-01-29	04:10:00	DeKUWC	-0.387087	36.957	1769
8-2016-01-29-04-15-01	2016-01-29	04:15:00	DeKUWC	-0.387087	36.957	1769
8-2016-01-29-04-20-01	2016-01-29	04:20:00	DeKUWC	-0.387087	36.957	1769
8-2016-01-29-04-25-01	2016-01-29	04:25:00	DeKUWC	-0.387087	36.957	1769
8-2016-01-29-04-30-01	2016-01-29	04:30:00	DeKUWC	-0.387087	36.957	1769
8-2016-01-29-04-35-01	2016-01-29	04:35:00	DeKUWC	-0.387087	36.957	1769
8-2016-01-29-04-40-01	2016-01-29	04:40:00	DeKUWC	-0.387087	36.957	1769
8-2016-01-29-04-45-01	2016-01-29	04:45:00	DeKUWC	-0.387087	36.957	1769
8-2016-01-29-04-50-01	2016-01-29	04:50:00	DeKUWC	-0.387087	36.957	1769
8-2016-01-29-04-55-01	2016-01-29	04:55:00	DeKUWC	-0.387087	36.957	1769
8-2016-01-29-05-00-02	2016-01-29	05:00:00	DeKUWC	-0.387087	36.957	1769
8-2016-01-29-05-05-01	2016-01-29	05:05:00	DeKUWC	-0.387087	36.957	1769
8-2016-01-29-05-10-01	2016-01-29	05:10:00	DeKUWC	-0.387087	36.957	1769
8-2016-01-29-05-15-01	2016-01-29	05:15:00	DeKUWC	-0.387087	36.957	1769
8-2016-01-29-05-20-02	2016-01-29	05:20:00	DeKUWC	-0.387087	36.957	1769
8-2016-01-29-05-25-01	2016-01-29	05:25:00	DeKUWC	-0.387087	36.957	1769
8-2016-01-29-05-30-01	2016-01-29	05:30:00	DeKUWC	-0.387087	36.957	1769
8-2016-01-29-05-35-01	2016-01-29	05:35:00	DeKUWC	-0.387087	36.957	1769
8-2016-01-29-05-40-01	2016-01-29	05:40:00	DeKUWC	-0.387087	36.957	1769
8-2016-01-29-05-45-02	2016-01-29	05:45:00	DeKUWC	-0.387087	36.957	1769
8-2016-01-29-05-50-01	2016-01-29	05:50:00	DeKUWC	-0.387087	36.957	1769
8-2016-01-29-05-55-01	2016-01-29	05:55:00	DeKUWC	-0.387087	36.957	1769
8-2016-01-29-06-00-01	2016-01-29	06:00:00	DeKUWC	-0.387087	36.957	1769
8-2016-01-29-06-05-01	2016-01-29	06:05:00	DeKUWC	-0.387087	36.957	1769
8-2016-01-29-06-10-02	2016-01-29	06:10:00	DeKUWC	-0.387087	36.957	1769	WBRC	GCWA;HATU
8-2016-01-29-06-15-01	2016-01-29	06:15:00	DeKUWC	-0.387087	36.957	1769		CARC	Engine noise
8-2016-01-29-06-20-01	2016-01-29	06:20:00	DeKUWC	-0.387087	36.957	1769
8-2016-01-29-06-25-02	2016-01-29	06:25:00	DeKUWC	-0.387087	36.957	1769
8-2016-01-29-06-30-01	2016-01-29	06:30:00	DeKUWC	-0.387087	36.957	1769	GBCA	HATU
8-2016-01-29-06-35-01	2016-01-29	06:35:00	DeKUWC	-0.387087	36.957	1769	GBCA;YWGR
8-2016-01-29-06-40-01	2016-01-29	06:40:00	DeKUWC	-0.387087	36.957	1769		COSU;HATU	Engine noise
8-2016-01-29-06-45-01	2016-01-29	06:45:00	DeKUWC	-0.387087	36.957	1769	SCHO
8-2016-01-29-06-50-02	2016-01-29	06:50:00	DeKUWC	-0.387087	36.957	1769
8-2016-01-29-06-55-01	2016-01-29	06:55:00	DeKUWC	-0.387087	36.957	1769
8-2016-01-29-07-00-01	2016-01-29	07:00:00	DeKUWC	-0.387087	36.957	1769
8-2016-01-29-07-05-01	2016-01-29	07:05:00	DeKUWC	-0.387087	36.957	1769
8-2016-01-29-07-10-01	2016-01-29	07:10:00	DeKUWC	-0.387087	36.957	1769
8-2016-01-29-07-15-02	2016-01-29	07:15:00	DeKUWC	-0.387087	36.957	1769	BWWA;YWGR	HATU
8-2016-01-29-07-20-01	2016-01-29	07:20:00	DeKUWC	-0.387087	36.957	1769
8-2016-01-29-07-25-01	2016-01-29	07:25:00	DeKUWC	-0.387087	36.957	1769	GBCA		Possible Robin-Chat
8-2016-01-29-07-30-01	2016-01-29	07:30:00	DeKUWC	-0.387087	36.957	1769
8-2016-01-29-07-35-02	2016-01-29	07:35:00	DeKUWC	-0.387087	36.957	1769
8-2016-01-29-07-40-01	2016-01-29	07:40:00	DeKUWC	-0.387087	36.957	1769
8-2016-01-29-07-45-01	2016-01-29	07:45:00	DeKUWC	-0.387087	36.957	1769	YWGR		Engine noise
8-2016-01-29-07-50-01	2016-01-29	07:50:00	DeKUWC	-0.387087	36.957	1769		TRBO;GBCA;COBU
8-2016-01-29-07-55-01	2016-01-29	07:55:00	DeKUWC	-0.387087	36.957	1769
8-2016-01-29-08-00-02	2016-01-29	08:00:00	DeKUWC	-0.387087	36.957	1769
8-2016-01-29-08-05-01	2016-01-29	08:05:00	DeKUWC	-0.387087	36.957	1769
8-2016-01-29-08-10-01	2016-01-29	08:10:00	DeKUWC	-0.387087	36.957	1769
8-2016-01-29-08-15-01	2016-01-29	08:15:00	DeKUWC	-0.387087	36.957	1769	YWGR
8-2016-01-29-08-20-01	2016-01-29	08:20:00	DeKUWC	-0.387087	36.957	1769		YWGR;SCHO	Engine noise
8-2016-01-29-08-25-01	2016-01-29	08:25:00	DeKUWC	-0.387087	36.957	1769
8-2016-01-29-08-30-01	2016-01-29	08:30:00	DeKUWC	-0.387087	36.957	1769
8-2016-01-29-08-35-01	2016-01-29	08:35:00	DeKUWC	-0.387087	36.957	1769		YWGR	Engine noise
8-2016-01-29-08-40-01	2016-01-29	08:40:00	DeKUWC	-0.387087	36.957	1769
8-2016-01-29-08-45-01	2016-01-29	08:45:00	DeKUWC	-0.387087	36.957	1769
8-2016-01-29-08-50-01	2016-01-29	08:50:00	DeKUWC	-0.387087	36.957	1769
8-2016-01-29-08-55-01	2016-01-29	08:55:00	DeKUWC	-0.387087	36.957	1769
8-2016-01-29-09-00-01	2016-01-29	09:00:00	DeKUWC	-0.387087	36.957	1769
8-2016-01-29-09-05-01	2016-01-29	09:05:00	DeKUWC	-0.387087	36.957	1769
8-2016-01-29-09-10-01	2016-01-29	09:10:00	DeKUWC	-0.387087	36.957	1769
8-2016-01-29-09-15-01	2016-01-29	09:15:00	DeKUWC	-0.387087	36.957	1769
8-2016-01-29-09-20-01	2016-01-29	09:20:00	DeKUWC	-0.387087	36.957	1769	YWGR		Sykes Monkey
8-2016-01-29-09-25-02	2016-01-29	09:25:00	DeKUWC	-0.387087	36.957	1769
8-2016-01-29-09-30-01	2016-01-29	09:30:00	DeKUWC	-0.387087	36.957	1769	YWGR	YRTI;YEBI
8-2016-01-29-09-35-01	2016-01-29	09:35:00	DeKUWC	-0.387087	36.957	1769
8-2016-01-29-09-40-01	2016-01-29	09:40:00	DeKUWC	-0.387087	36.957	1769
8-2016-01-29-09-45-01	2016-01-29	09:45:00	DeKUWC	-0.387087	36.957	1769
8-2016-01-29-09-50-02	2016-01-29	09:50:00	DeKUWC	-0.387087	36.957	1769
8-2016-01-29-09-55-01	2016-01-29	09:55:00	DeKUWC	-0.387087	36.957	1769
8-2016-01-29-10-00-01	2016-01-29	10:00:00	DeKUWC	-0.387087	36.957	1769
8-2016-01-29-10-05-01	2016-01-29	10:05:00	DeKUWC	-0.387087	36.957	1769
8-2016-01-29-10-10-01	2016-01-29	10:10:00	DeKUWC	-0.387087	36.957	1769
8-2016-01-29-10-15-02	2016-01-29	10:15:00	DeKUWC	-0.387087	36.957	1769
8-2016-01-29-10-20-01	2016-01-29	10:20:00	DeKUWC	-0.387087	36.957	1769
8-2016-01-29-10-25-01	2016-01-29	10:25:00	DeKUWC	-0.387087	36.957	1769	GBCA;YWGR;SCHO;BMCF		Engine noise
8-2016-01-29-10-30-01	2016-01-29	10:30:00	DeKUWC	-0.387087	36.957	1769
8-2016-01-29-10-35-02	2016-01-29	10:35:00	DeKUWC	-0.387087	36.957	1769
8-2016-01-29-10-40-01	2016-01-29	10:40:00	DeKUWC	-0.387087	36.957	1769
8-2016-01-29-10-45-01	2016-01-29	10:45:00	DeKUWC	-0.387087	36.957	1769
8-2016-01-29-10-50-01	2016-01-29	10:50:00	DeKUWC	-0.387087	36.957	1769
8-2016-01-29-10-55-01	2016-01-29	10:55:00	DeKUWC	-0.387087	36.957	1769
8-2016-01-29-11-00-02	2016-01-29	11:00:00	DeKUWC	-0.387087	36.957	1769
8-2016-01-29-11-05-01	2016-01-29	11:05:00	DeKUWC	-0.387087	36.957	1769
8-2016-01-29-11-10-01	2016-01-29	11:10:00	DeKUWC	-0.387087	36.957	1769	YWGR
8-2016-01-29-11-15-01	2016-01-29	11:15:00	DeKUWC	-0.387087	36.957	1769
8-2016-01-29-11-20-02	2016-01-29	11:20:00	DeKUWC	-0.387087	36.957	1769
8-2016-01-29-11-25-01	2016-01-29	11:25:00	DeKUWC	-0.387087	36.957	1769
8-2016-01-29-11-30-01	2016-01-29	11:30:00	DeKUWC	-0.387087	36.957	1769
8-2016-01-29-11-35-01	2016-01-29	11:35:00	DeKUWC	-0.387087	36.957	1769
8-2016-01-29-11-40-01	2016-01-29	11:40:00	DeKUWC	-0.387087	36.957	1769
8-2016-01-29-11-45-02	2016-01-29	11:45:00	DeKUWC	-0.387087	36.957	1769
8-2016-01-29-11-50-01	2016-01-29	11:50:00	DeKUWC	-0.387087	36.957	1769
8-2016-01-29-11-55-01	2016-01-29	11:55:00	DeKUWC	-0.387087	36.957	1769
8-2016-01-29-12-00-01	2016-01-29	12:00:00	DeKUWC	-0.387087	36.957	1769
8-2016-01-29-12-05-01	2016-01-29	12:05:00	DeKUWC	-0.387087	36.957	1769
8-2016-01-29-12-10-02	2016-01-29	12:10:00	DeKUWC	-0.387087	36.957	1769	YWGR	GBCA;SCHO	Robin-Chat mimicking BHOR; He-goat
8-2016-01-29-12-15-01	2016-01-29	12:15:00	DeKUWC	-0.387087	36.957	1769
8-2016-01-29-12-20-01	2016-01-29	12:20:00	DeKUWC	-0.387087	36.957	1769
8-2016-01-29-12-25-01	2016-01-29	12:25:00	DeKUWC	-0.387087	36.957	1769
8-2016-01-29-12-30-02	2016-01-29	12:30:00	DeKUWC	-0.387087	36.957	1769
8-2016-01-29-12-35-01	2016-01-29	12:35:00	DeKUWC	-0.387087	36.957	1769
8-2016-01-29-12-40-01	2016-01-29	12:40:00	DeKUWC	-0.387087	36.957	1769
8-2016-01-29-12-45-01	2016-01-29	12:45:00	DeKUWC	-0.387087	36.957	1769
8-2016-01-29-12-50-01	2016-01-29	12:50:00	DeKUWC	-0.387087	36.957	1769
8-2016-01-29-12-55-02	2016-01-29	12:55:00	DeKUWC	-0.387087	36.957	1769
8-2016-01-29-13-00-01	2016-01-29	13:00:00	DeKUWC	-0.387087	36.957	1769
8-2016-01-29-13-05-01	2016-01-29	13:05:00	DeKUWC	-0.387087	36.957	1769
8-2016-01-29-13-10-01	2016-01-29	13:10:00	DeKUWC	-0.387087	36.957	1769
8-2016-01-29-13-15-01	2016-01-29	13:15:00	DeKUWC	-0.387087	36.957	1769
8-2016-01-29-13-20-01	2016-01-29	13:20:00	DeKUWC	-0.387087	36.957	1769
8-2016-01-29-13-25-01	2016-01-29	13:25:00	DeKUWC	-0.387087	36.957	1769
8-2016-01-29-13-30-01	2016-01-29	13:30:00	DeKUWC	-0.387087	36.957	1769
8-2016-01-29-13-35-01	2016-01-29	13:35:00	DeKUWC	-0.387087	36.957	1769
