# Supplementary material for: A Bioacoustic Record of a Conservancy in the Mount Kenya Ecosystem
Source: Biodivers Data J. 2016 Oct 5;(4):e9906. doi: 10.3897/BDJ.4.e9906 (PMC5136683; doi:10.3897/BDJ.4.e9906)
Supplement: Supplementary material 3 — Acoustic Recorder Cost [file biodiversity_data_journal-4-e9906-s003.xlsx]

## Sheet: Sheet1
#	Item	Cost (Kenya Shilling)	Cost (USD)
1	Raspberry Pi Model B+	4500	45
2	Microphone	600	6
3	8 GB Memory Card	1500	15
4	Wi-Fi Module	1000	10
5	USB Battery Bank (6250mAh 5.1V)	2500	25
	Total	10,100.00	101
